# Supplementary material for: Phytochemical Characterization and Chemotherapeutic Potential of Cinnamomum verum Extracts on the Multiplication of Protozoan Parasites In Vitro and In Vivo
Source: MDPI journal article supplement (doi:10.3390/molecules25040996), 2020-02-24

# My GC-MS Report

RT: 0.00 - 36.00 SM: 7B

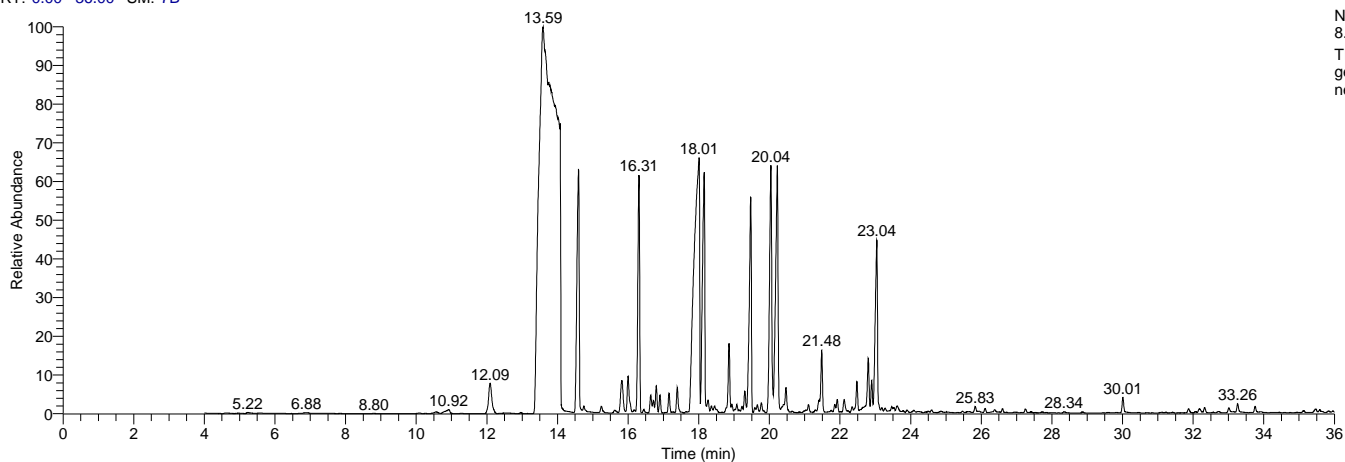

NL:  
8.87E8  
TIC MS  
gerfa\_aceto  
ne

| RT    | Area % | Peak Area      |
|-------|--------|----------------|
| 12.09 | 0.82   | 426551844.35   |
| 13.59 | 52.87  | 27490372653.35 |
| 14.59 | 4.70   | 2444275758.69  |
| 15.82 | 0.69   | 358181589.01   |
| 16.00 | 0.62   | 323448015.47   |
| 16.31 | 3.72   | 1934080489.00  |
| 16.80 | 0.34   | 175677656.25   |
| 17.39 | 0.37   | 193108979.13   |
| 18.01 | 10.63  | 5524798093.56  |
| 18.15 | 4.35   | 2259611528.08  |
| 18.86 | 1.00   | 519143271.26   |
| 19.31 | 0.28   | 146352862.98   |
| 19.47 | 3.92   | 2037223466.72  |
| 20.04 | 4.64   | 2412482316.33  |
| 20.23 | 5.04   | 2621519142.89  |
| 20.47 | 0.44   | 227988039.01   |
| 21.48 | 1.05   | 546572802.75   |
| 22.48 | 0.41   | 215654397.46   |
| 22.80 | 0.67   | 347516631.91   |
| 22.90 | 0.28   | 147839625.80   |
| 23.04 | 3.15   | 1639644594.88  |

gerfa\_acetone #2413 RT: 12.09 AV: 1 NL: 1.56E7  
T: + c EI Full ms [50.000-650.000]

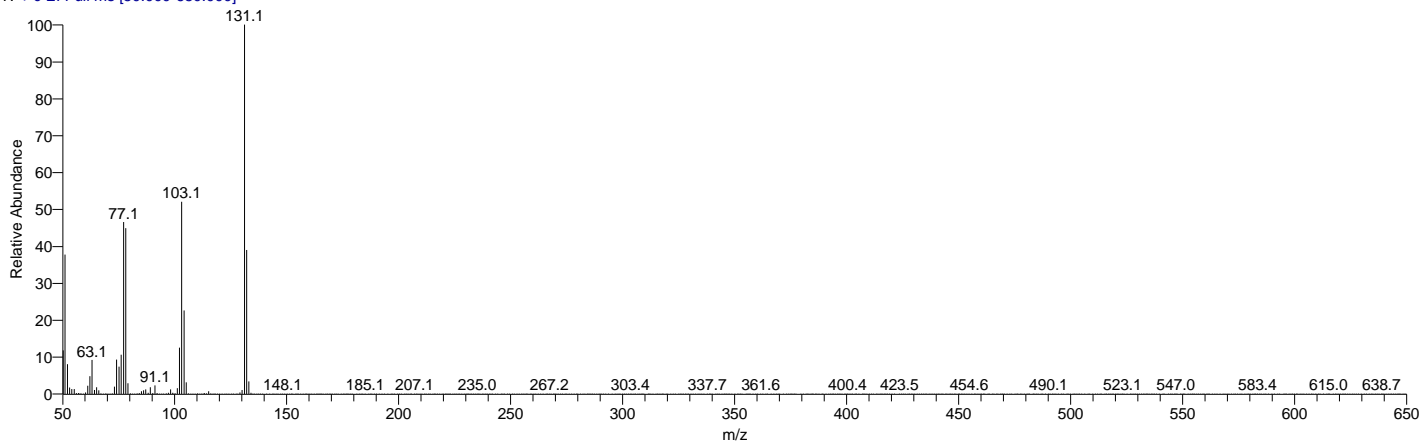

# My GC-MS Report

| RT    | Compound Name             | Area % | Molecular Formula               | Molecular Weight | Cas #      | MF  | Library |
|-------|---------------------------|--------|---------------------------------|------------------|------------|-----|---------|
| 12.09 | (Z)-3-Phenylacrylaldehyde | 0.82   | C <sub>9</sub> H <sub>8</sub> O | 132              | 57194-69-1 | 961 | mainlib |
| 12.09 | Cinnamaldehyde, (E)-      | 0.82   | C <sub>9</sub> H <sub>8</sub> O | 132              | 14371-10-9 | 946 | mainlib |
| 12.09 | 2-Propenal, 3-phenyl-     | 0.82   | C <sub>9</sub> H <sub>8</sub> O | 132              | 104-55-2   | 945 | replib  |

Compound Structure

Hit Spectrum

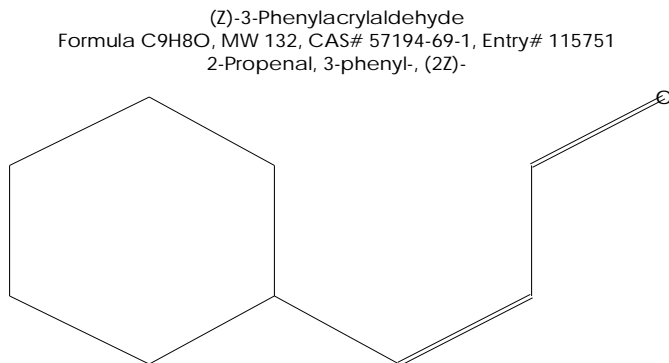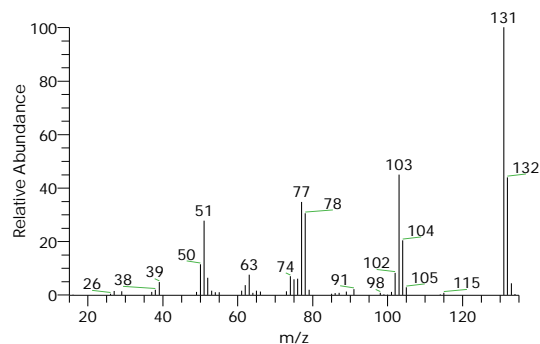

Cinnamaldehyde, (E)-  
Formula C<sub>9</sub>H<sub>8</sub>O, MW 132, CAS# 14371-10-9, Entry# 115750  
(E)-Cinnamaldehyde

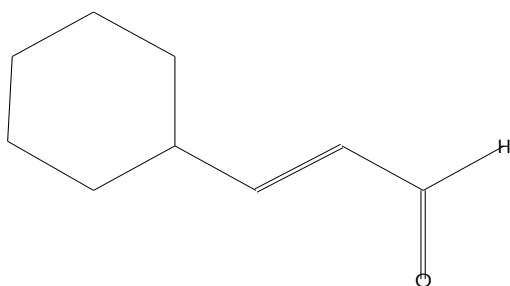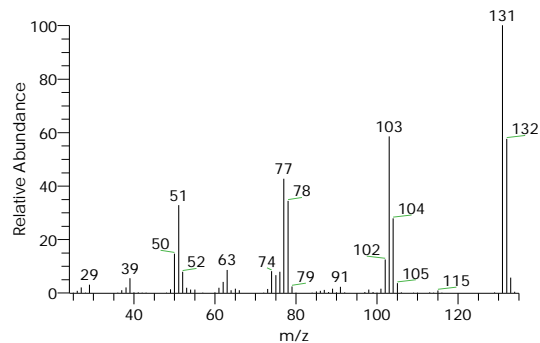

2-Propenal, 3-phenyl-  
Formula C<sub>9</sub>H<sub>8</sub>O, MW 132, CAS# 104-55-2, Entry# 20950  
Cinnamaldehyde

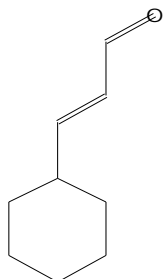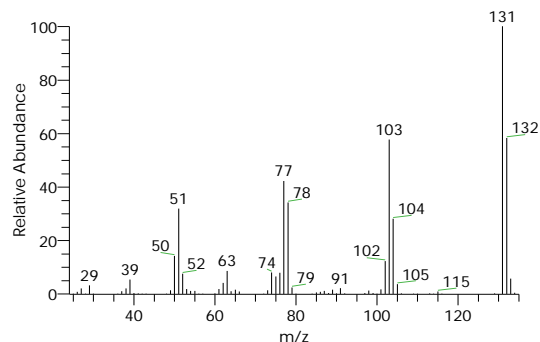

# My GC-MS Report

gerfa\_acetone #2859 RT: 13.59 AV: 1 NL: 2.21E8  
T: + c EI Full ms [50.000-650.000]

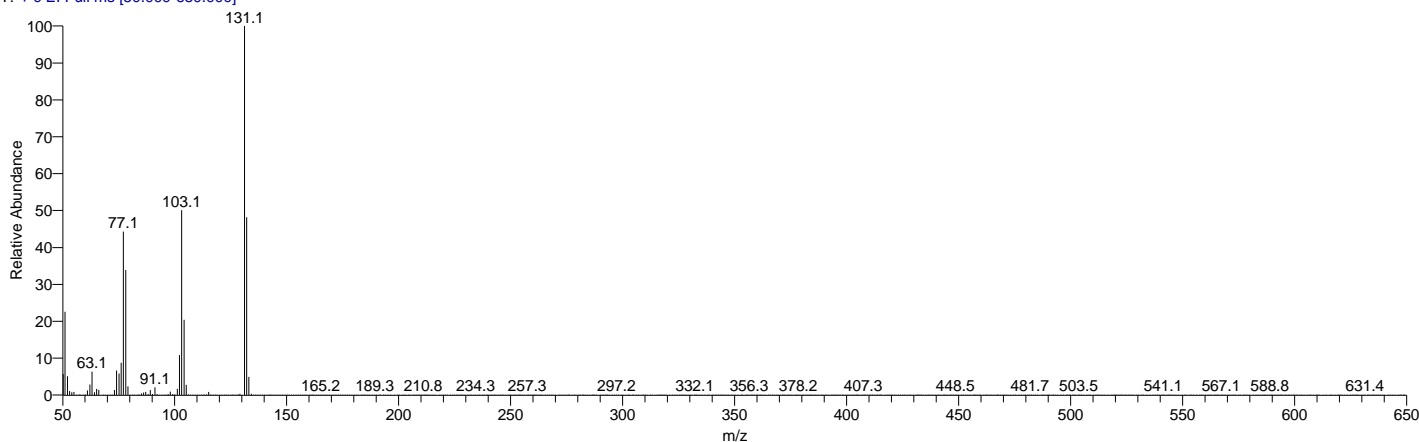

| RT    | Compound Name             | Area % | Molecular Formula | Molecular Weight | Cas #      | MF  | Library |
|-------|---------------------------|--------|-------------------|------------------|------------|-----|---------|
| 13.59 | (Z)-3-Phenylacrylaldehyde | 52.87  | C9H8O             | 132              | 57194-69-1 | 960 | mainlib |
| 13.59 | Cinnamaldehyde, (E)-      | 52.87  | C9H8O             | 132              | 14371-10-9 | 947 | mainlib |
| 13.59 | 2-Propenal, 3-phenyl-     | 52.87  | C9H8O             | 132              | 104-55-2   | 946 | replib  |

Compound Structure

Hit Spectrum

(Z)-3-Phenylacrylaldehyde  
Formula C9H8O, MW 132, CAS# 57194-69-1, Entry# 115751  
2-Propenal, 3-phenyl-, (Z)-

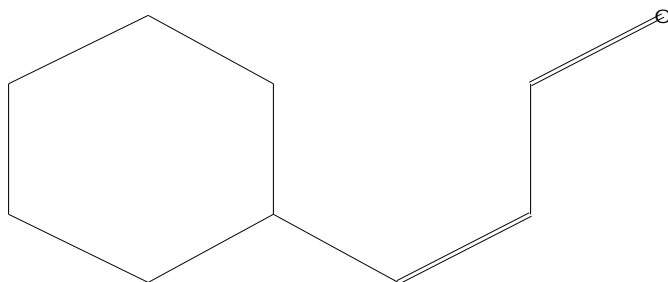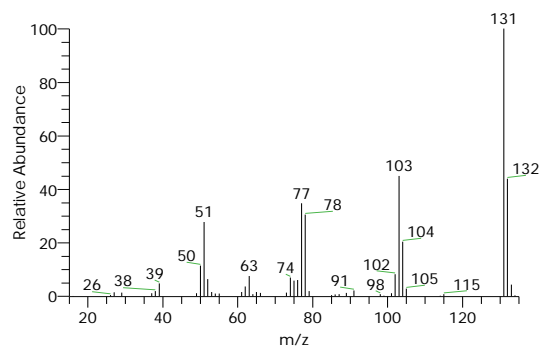

Cinnamaldehyde, (E)-  
Formula C9H8O, MW 132, CAS# 14371-10-9, Entry# 115750  
(E)-Cinnamaldehyde

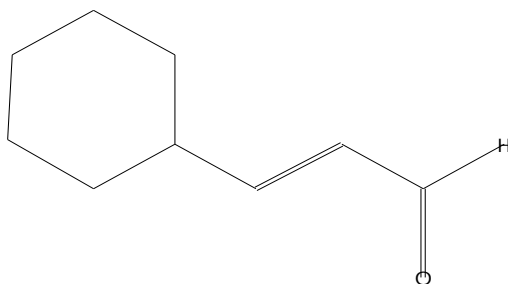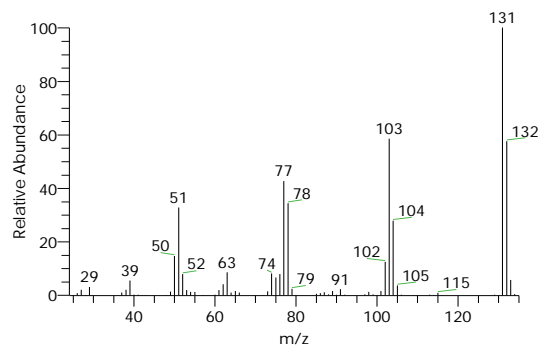

2-Propenal, 3-phenyl-  
Formula C9H8O, MW 132, CAS# 104-55-2, Entry# 20950  
Cinnamaldehyde

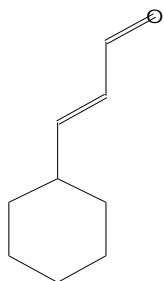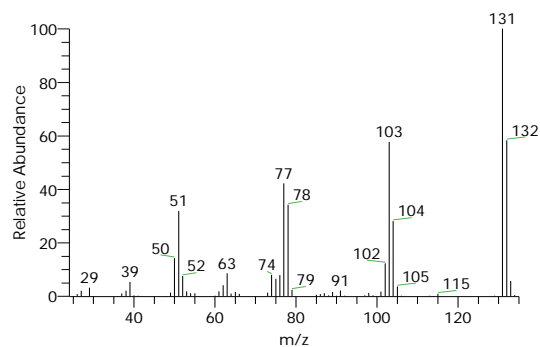

# My GC-MS Report

gerfa\_acetone #3159 RT: 14.59 AV: 1 NL: 7.60E7  
T: + c EI Full ms [50.000-650.000]

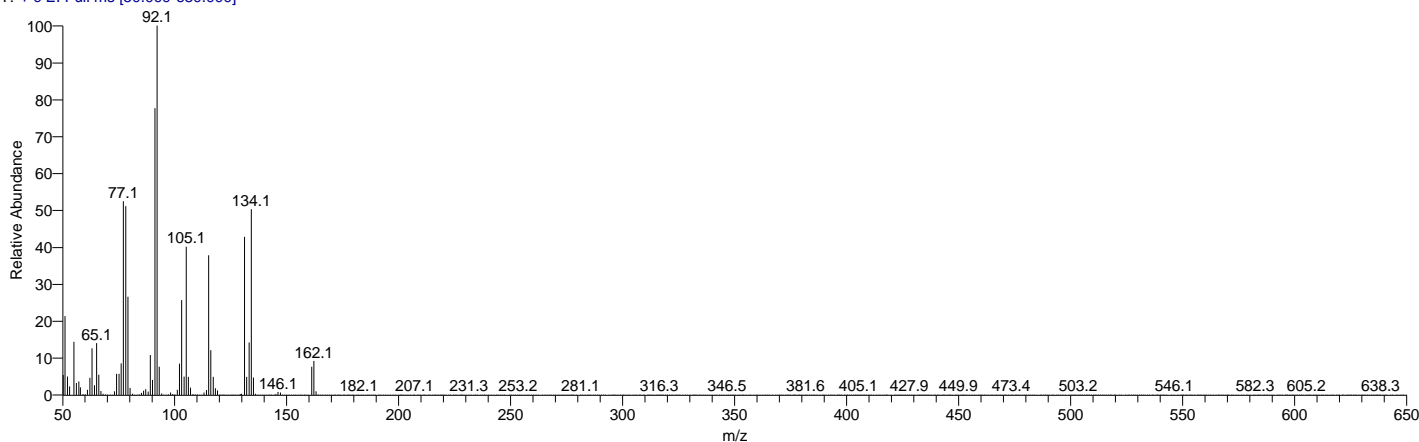

| RT    | Compound Name                  | Area % | Molecular Formula                | Molecular Weight | Cas #     | MF  | Library         |
|-------|--------------------------------|--------|----------------------------------|------------------|-----------|-----|-----------------|
| 14.59 | 2-Propen-1-ol, 3-phenyl-, (E)- | 4.70   | C <sub>9</sub> H <sub>10</sub> O | 134              | 4407-36-7 | 914 | mainlib         |
| 14.59 | 2-Propen-1-ol, 3-phenyl-       | 4.70   | C <sub>9</sub> H <sub>10</sub> O | 134              | 104-54-1  | 903 | replib          |
| 14.59 | 3-PHENYL-2-PROPEN-1-OL         | 4.70   | C <sub>9</sub> H <sub>10</sub> O | 134              | NA        | 903 | WileyRegistry8e |

Compound Structure

Hit Spectrum

2-Propen-1-ol, 3-phenyl-, (E)-  
Formula C<sub>9</sub>H<sub>10</sub>O, MW 134, CAS# 4407-36-7, Entry# 65164  
\$:28OOCDEMITAIZTP-QPJXVBHSA-N

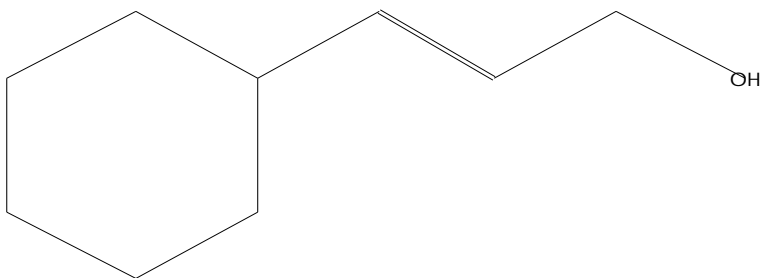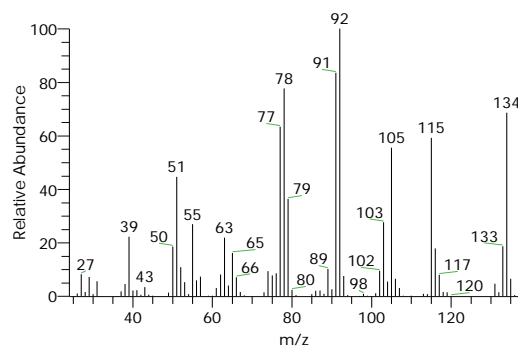

2-Propen-1-ol, 3-phenyl-  
Formula C<sub>9</sub>H<sub>10</sub>O, MW 134, CAS# 104-54-1, Entry# 13932  
Cinnamyl alcohol

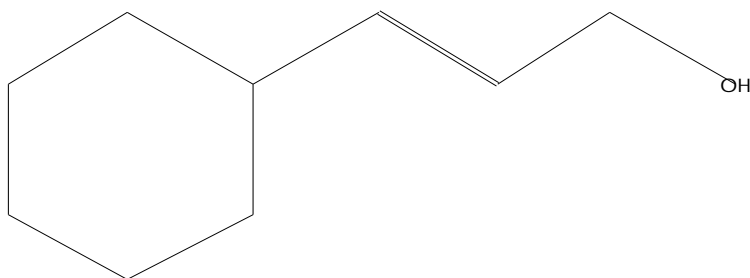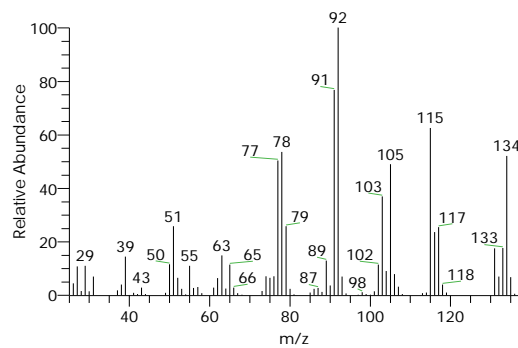

3-PHENYL-2-PROPEN-1-OL  
Formula C<sub>9</sub>H<sub>10</sub>O, MW 134, CAS# NA, Entry# 384433  
ZIMTALKOHOL

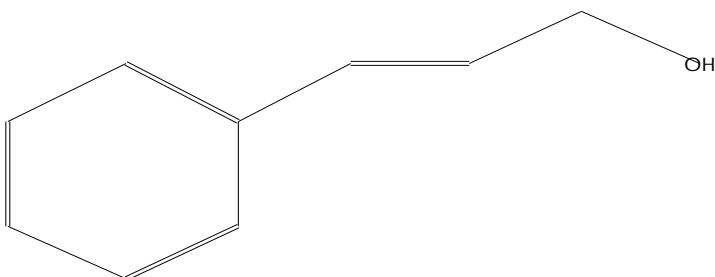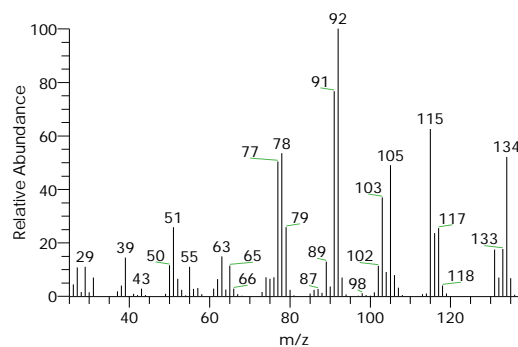

# My GC-MS Report

gerfa\_acetone #3525 RT: 15.82 AV: 1 NL: 1.13E7  
T: + c EI Full ms [50.000-650.000]

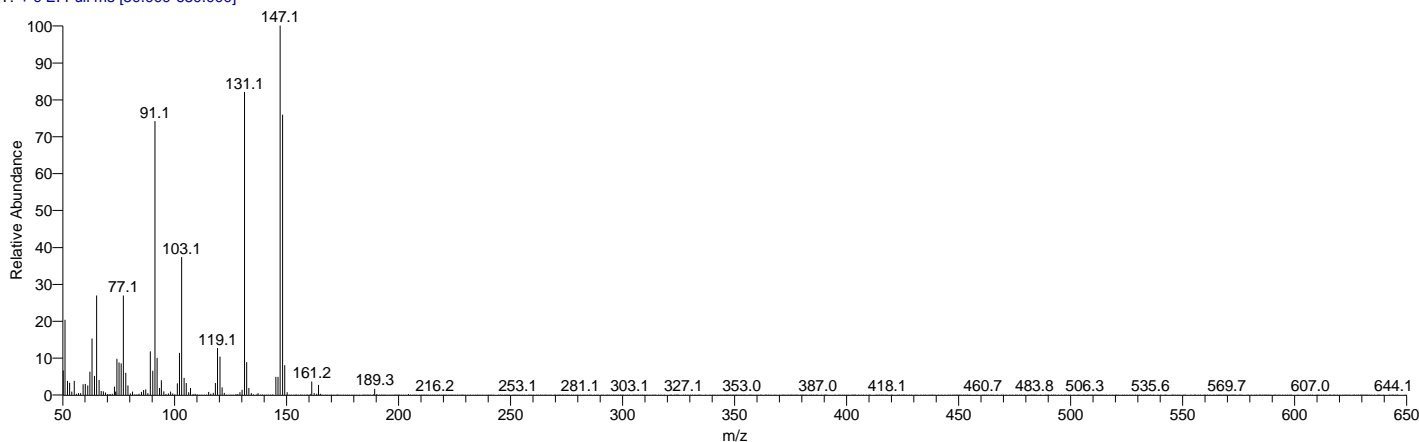

| RT    | Compound Name                     | Area % | Molecular Formula | Molecular Weight | Cas #    | MF  | Library         |
|-------|-----------------------------------|--------|-------------------|------------------|----------|-----|-----------------|
| 15.82 | 2-PROPENOIC ACID, 3-PHENYL-, (E)- | 0.69   | C9H8O2            | 148              | 140-10-3 | 850 | WileyRegistry8e |
| 15.82 | 2-PROPENOIC ACID, 3-PHENYL-       | 0.69   | C9H8O2            | 148              | 621-82-9 | 850 | WileyRegistry8e |
| 15.82 | 2-Propenoic acid, 3-phenyl-       | 0.69   | C9H8O2            | 148              | 621-82-9 | 855 | replib          |

## Compound Structure

## Hit Spectrum

2-PROPENOIC ACID, 3-PHENYL-, (E)-  
Formula C9H8O2, MW 148, CAS# 140-10-3, Entry# 32043  
CINNAMIC ACID

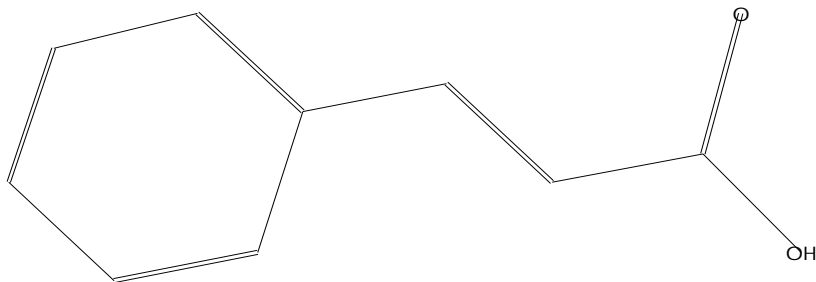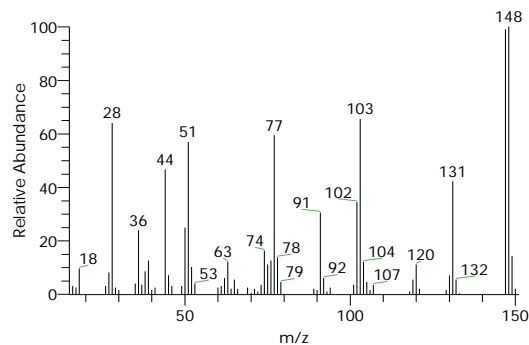

2-PROPENOIC ACID, 3-PHENYL-  
Formula C9H8O2, MW 148, CAS# 621-82-9, Entry# 32046  
CINNAMIC ACID

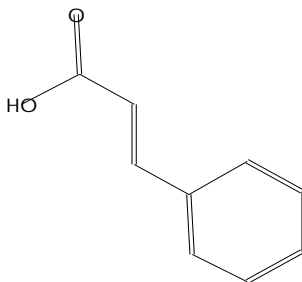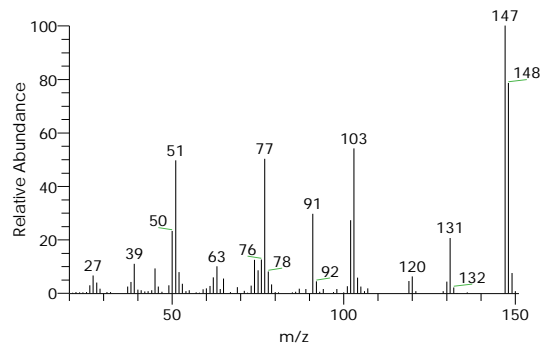

2-Propenoic acid, 3-phenyl-  
Formula C9H8O2, MW 148, CAS# 621-82-9, Entry# 23248  
Cinnamic acid

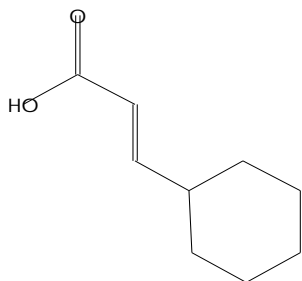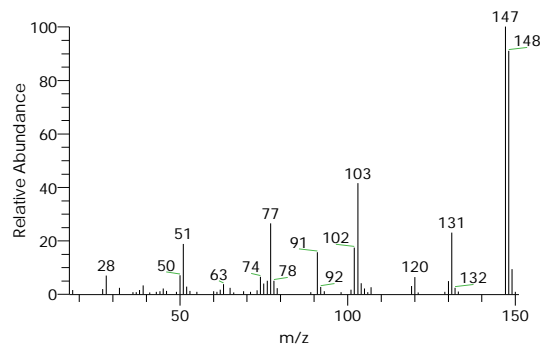

# My GC-MS Report

gerfa\_acetone #3578 RT: 16.00 AV: 1 NL: 7.77E6  
T: + c EI Full ms [50.000-650.000]

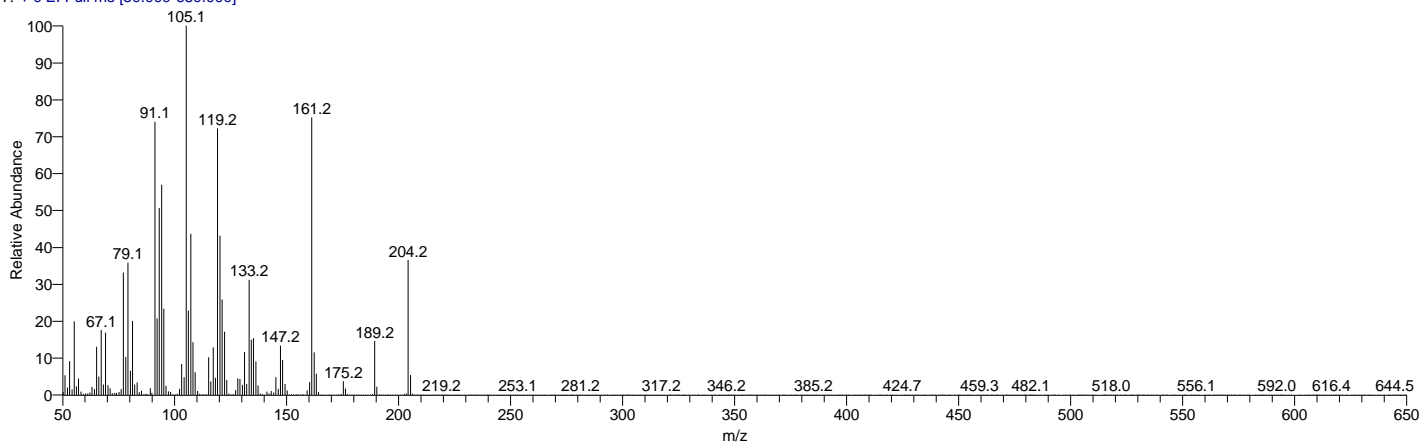

| RT    | Compound Name                                                                                        | Area % | Molecular Formula | Molecular Weight | Cas #      | MF  | Library         |
|-------|------------------------------------------------------------------------------------------------------|--------|-------------------|------------------|------------|-----|-----------------|
| 16.00 | 1,2,4-Metheno-1H-indene, octahydro-1,7a-dimethyl-5-(1-methylethyl)-, [1S-(1à,2à,3aà,4à,5à,7aà,8S*)]- | 0.62   | C15H24            | 204              | 22469-52-9 | 951 | replib          |
| 16.00 | (+)-CYCLOSATIVEN                                                                                     | 0.62   | C15H24            | 204              | NA         | 928 | WileyRegistry8e |
| 16.00 | 1,2,4-Metheno-1H-indene, octahydro-1,7a-dimethyl-5-(1-methylethyl)-, [1S-(1à,2à,3aà,4à,5à,7aà,8S*)]- | 0.62   | C15H24            | 204              | 22469-52-9 | 928 | mainlib         |

Compound Structure

Hit Spectrum

Formula C15H24, MW 204, CAS# 22469-52-9, Entry# 16426  
(+)-Cyclosativene

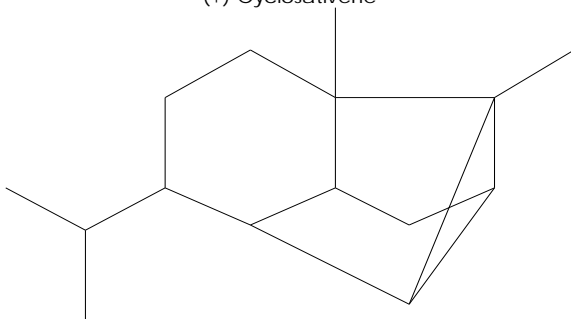

(+)-CYCLOSATIVEN

Formula C15H24, MW 204, CAS# NA, Entry# 385560

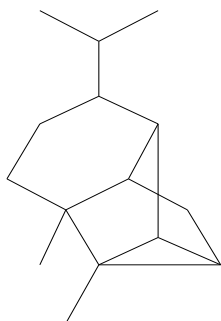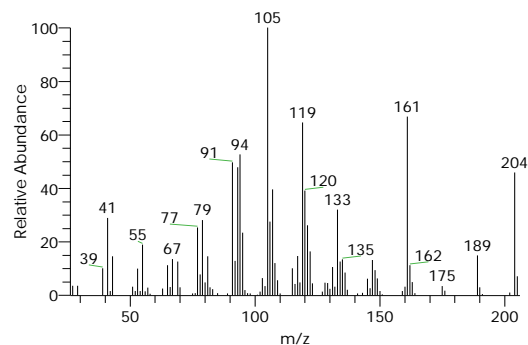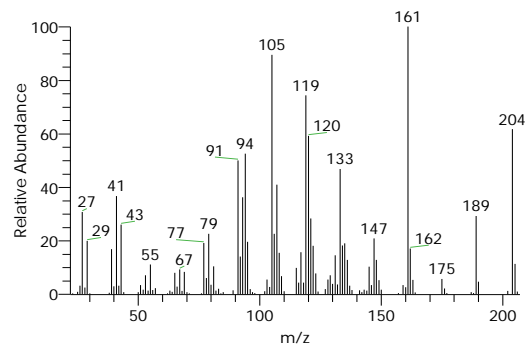

# My GC-MS Report

Compound Structure

Hit Spectrum

Formula C<sub>15</sub>H<sub>24</sub>, MW 204, CAS# 22469-52-9, Entry# 150503

(+)-Cyclosativene

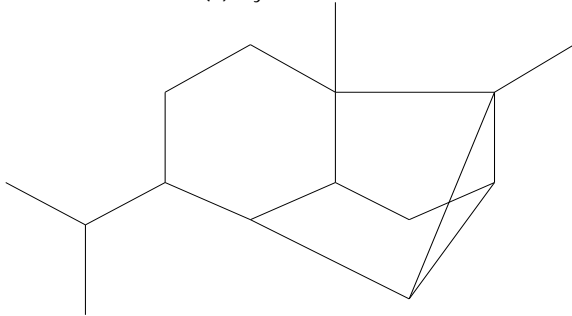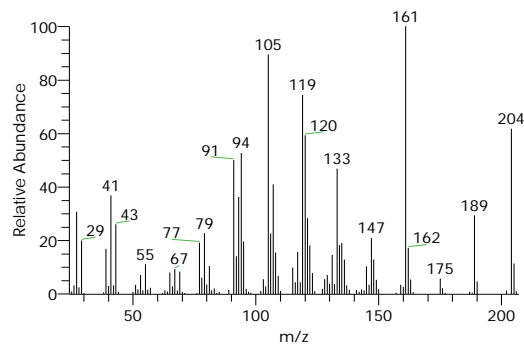

gerfa\_acetone #3670 RT: 16.31 AV: 1 NL: 8.16E7

T: + c EI Full ms [50.000-650.000]

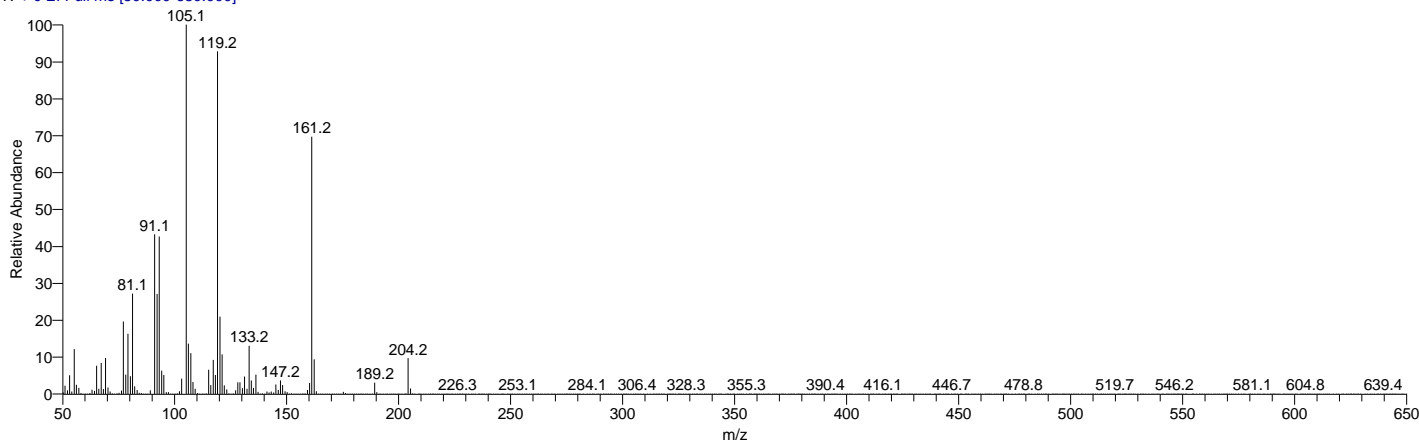

| RT    | Compound Name                                                        | Area % | Molecular Formula               | Molecular Weight | Cas #  | MF  | Library   |
|-------|----------------------------------------------------------------------|--------|---------------------------------|------------------|--------|-----|-----------|
| 16.31 | TRICYCLO[4.4.0.0(2,7)]DEC-3-ENE, 1,3-DIMETHYL-8-(1-METHYLETHYL)-, ST | 3.72   | C <sub>15</sub> H <sub>24</sub> | 204              | 3856-2 | 951 | WileyRegi |
| 16.31 | .alfa.-Copaene                                                       | 3.72   | C <sub>15</sub> H <sub>24</sub> | 204              | NA     | 934 | mainlib   |
| 16.31 | TRICYCLO[4.4.0.0(2,7)]DEC-3-ENE, 1,3-DIMETHYL-8-(1-METHYLETHYL)-, ST | 3.72   | C <sub>15</sub> H <sub>24</sub> | 204              | 3856-2 | 956 | WileyRegi |
|       |                                                                      |        |                                 |                  | 5-5    |     | stry8e    |

Compound Structure

Hit Spectrum

TRICYCLO[4.4.0.0(2,7)]DEC-3-ENE, 1,3-DIMETHYL-8-(1-METHYLETHYL)-, ST

Formula C<sub>15</sub>H<sub>24</sub>, MW 204, CAS# 3856-25-5, Entry# 89462

TRICYCLO[4.4.0.0(2,7)]DEC-3-ENE, 1,3-DIMETHYL-8-(1-METHYLETHYL)-, STEREOISOMER

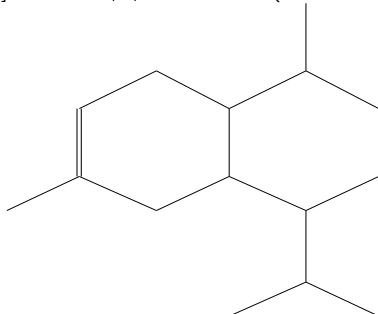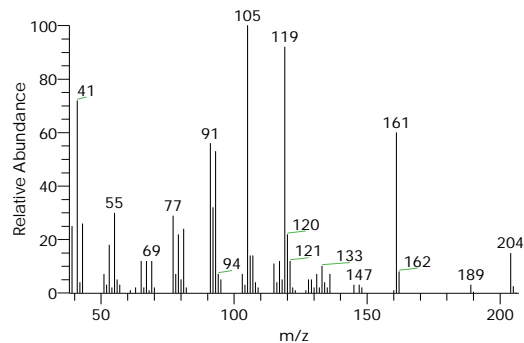

# My GC-MS Report

Compound Structure

Hit Spectrum

.alfa.-Copaene  
Formula C15H24, MW 204, CAS# NA, Entry# 150578  
\$:28VLXDPFLIRFYIME-UHFFFAOYSA-N

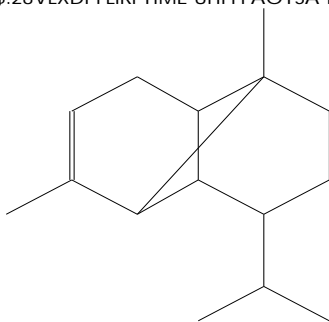

SI 933, RSI 934, mainlib, Entry# 150578, CAS# NA, .alfa.-Copaene

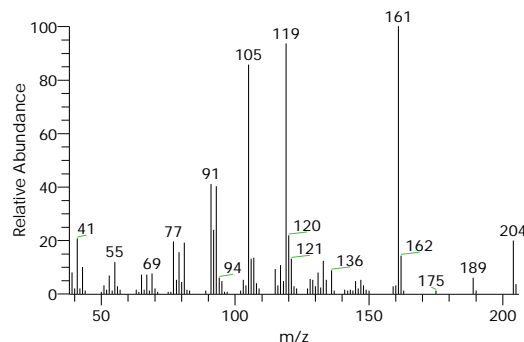

TRICYCLO[4.4.0.0(2,7)]DEC-3-ENE, 1,3-DIMETHYL-8-(1-METHYLETHYL)-, ST  
Formula C15H24, MW 204, CAS# 3856-25-5, Entry# 89463  
TRICYCLO[4.4.0.0(2,7)]DEC-3-ENE, 1,3-DIMETHYL-8-(1-METHYLETHYL)-, STEREOISOMER

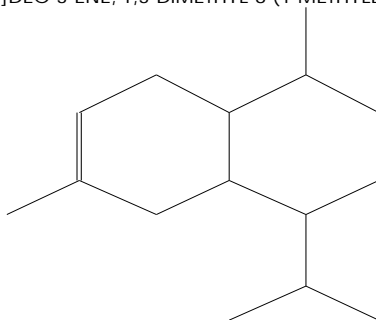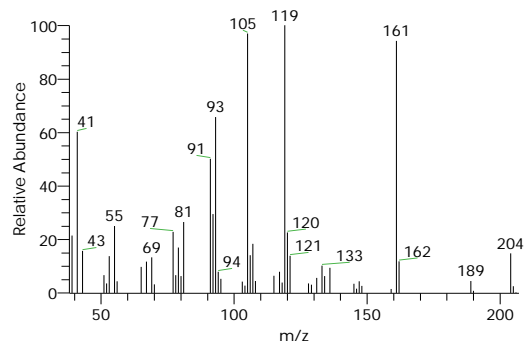

gerfa\_acetone #3816 RT: 16.80 AV: 1 NL: 4.55E6  
T: + c EI Full ms [50.000-650.000]

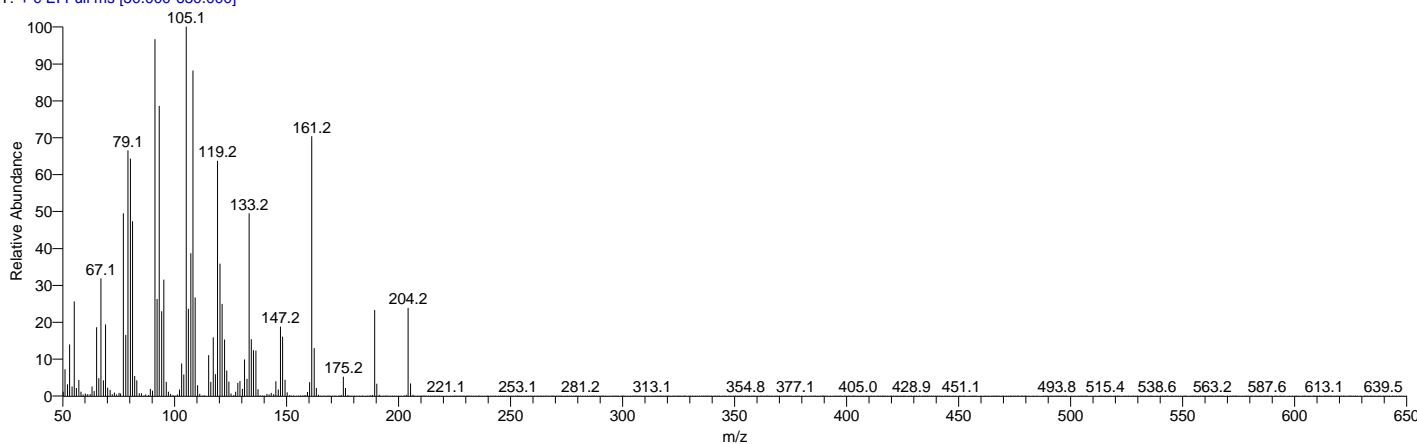

| RT    | Compound Name                                                                                      | Area % | Molecular Formula | Molecular Weight | Cas #     | MF  | Library         |
|-------|----------------------------------------------------------------------------------------------------|--------|-------------------|------------------|-----------|-----|-----------------|
| 16.80 | 1,4-METHANO-1H-INDENE, OCTAHYDRO-4-METHYL-8-METHYLENE-7-(1-METHYLETHYL)-, [1S-(1à,3Aá,4à,7à,7Aá)]- | 0.34   | C15H24            | 204              | 3650-28-0 | 894 | WileyRegistry8e |
| 16.80 | 1,4-Methano-1H-indene, octahydro-4-methyl-8-methylene-7-(1-methylethyl)-, [1S-(1à,3aá,4à,7à,7aá)]- | 0.34   | C15H24            | 204              | 3650-28-0 | 892 | mainlib         |
| 16.80 | 1,4-METHANO-1H-INDENE, OCTAHYDRO-4-METHYL-8-METHYLENE-7-(1-METHYLETHYL)-, [1S-(1à,3Aá,4à,7à,7Aá)]- | 0.34   | C15H24            | 204              | 3650-28-0 | 892 | WileyRegistry8e |

# My GC-MS Report

Compound Structure

Hit Spectrum

Formula C<sub>15</sub>H<sub>24</sub>, MW 204, CAS# 3650-28-0, Entry# 89186

(+)-SATIVEN

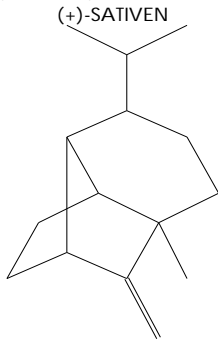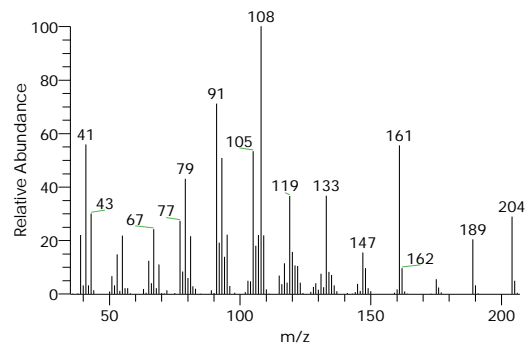

Formula C<sub>15</sub>H<sub>24</sub>, MW 204, CAS# 3650-28-0, Entry# 84625

(+)-Sativen

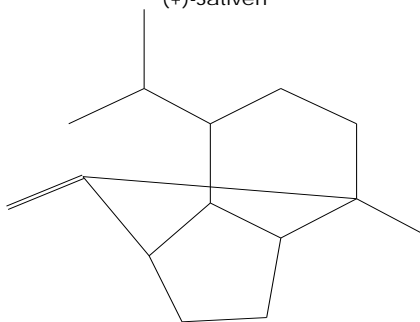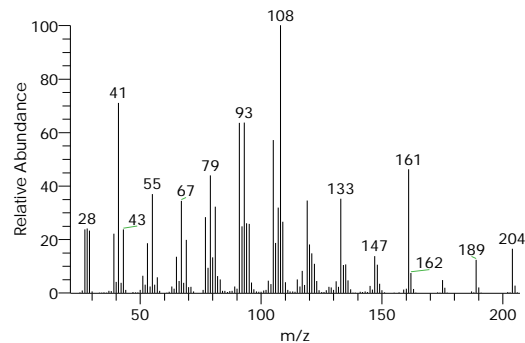

Formula C<sub>15</sub>H<sub>24</sub>, MW 204, CAS# 3650-28-0, Entry# 89185

(+)-SATIVEN

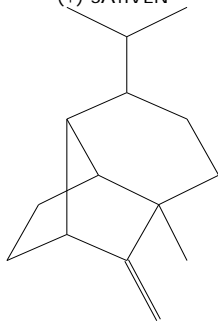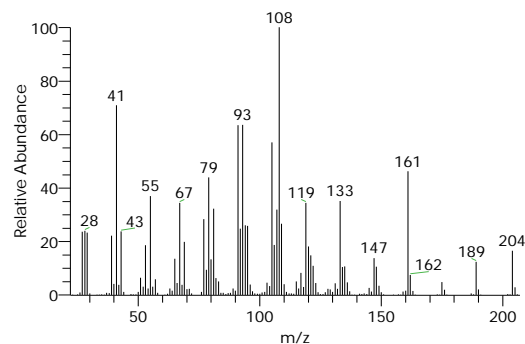

gerfa\_acetone #3993 RT: 17.39 AV: 1 NL: 4.85E6  
T: + c EI Full ms [50.000-650.000]

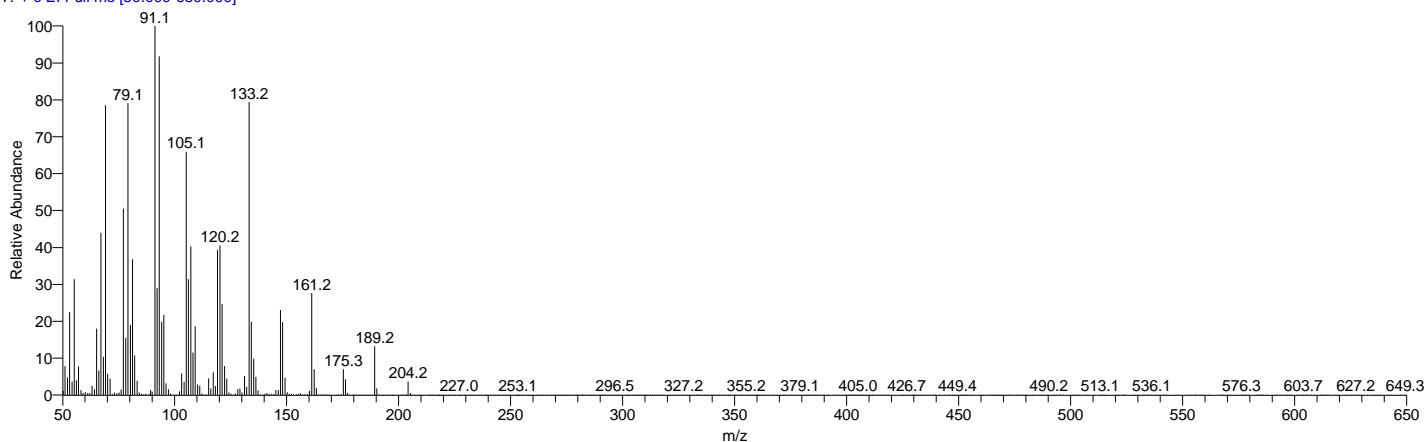

| RT    | Compound Name                                                                      | Area % | Molecular Formula               | Molecular Weight | Cas #   | MF  | Library             |
|-------|------------------------------------------------------------------------------------|--------|---------------------------------|------------------|---------|-----|---------------------|
| 17.39 | BICYCLO[7.2.0]UNDEC-4-ENE,<br>4,11,11-TRIMETHYL-8-METHYLENE-<br>[1R-(1R*,4E,9S*)]- | 0.37   | C <sub>15</sub> H <sub>24</sub> | 204              | 87-44-5 | 950 | WileyRegi<br>stry8e |

# My GC-MS Report

| RT    | Compound Name                                                                 | Area % | Molecular Formula | Molecular Weight | Cas #   | MF  | Library         |
|-------|-------------------------------------------------------------------------------|--------|-------------------|------------------|---------|-----|-----------------|
| 17.39 | BICYCLO[7.2.0]UNDEC-4-ENE, 4,11,11-TRIMETHYL-8-METHYLENE-, [1R-(1R*,4E,9S*)]- | 0.37   | C15H24            | 204              | 87-44-5 | 951 | WileyRegistry8e |
| 17.39 | BICYCLO[7.2.0]UNDEC-4-ENE, 4,11,11-TRIMETHYL-8-METHYLENE-, [1R-(1R*,4E,9S*)]- | 0.37   | C15H24            | 204              | 87-44-5 | 953 | WileyRegistry8e |

Compound Structure

Hit Spectrum

BICYCLO[7.2.0]UNDEC-4-ENE, 4,11,11-TRIMETHYL-8-METHYLENE-, [1R-(1R\*,4E,9S\*)]-  
Formula C15H24, MW 204, CAS# 87-44-5, Entry# 89162  
2,6,10,10-TETRAMETHYLBICYCLO[7.2.0]UNDECA-1,6-DIENE #

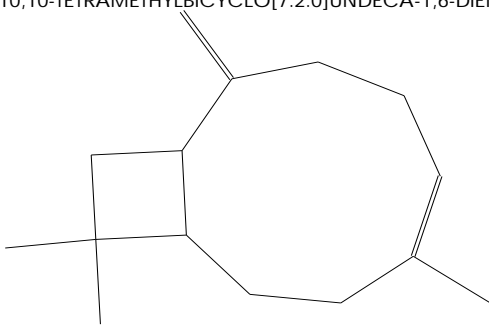

BICYCLO[7.2.0]UNDEC-4-ENE, 4,11,11-TRIMETHYL-8-METHYLENE-, [1R-(1R\*,4E,9S\*)]-  
Formula C15H24, MW 204, CAS# 87-44-5, Entry# 89170  
2,6,10,10-TETRAMETHYLBICYCLO[7.2.0]UNDECA-1,6-DIENE #

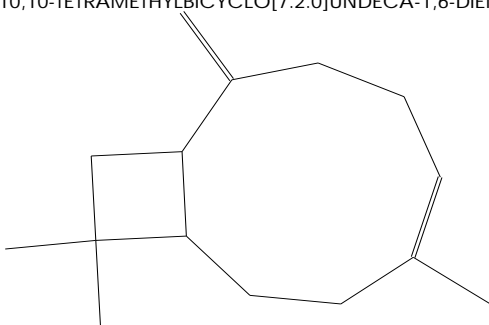

BICYCLO[7.2.0]UNDEC-4-ENE, 4,11,11-TRIMETHYL-8-METHYLENE-, [1R-(1R\*,4E,9S\*)]-  
Formula C15H24, MW 204, CAS# 87-44-5, Entry# 89167  
2,6,10,10-TETRAMETHYLBICYCLO[7.2.0]UNDECA-1,6-DIENE #

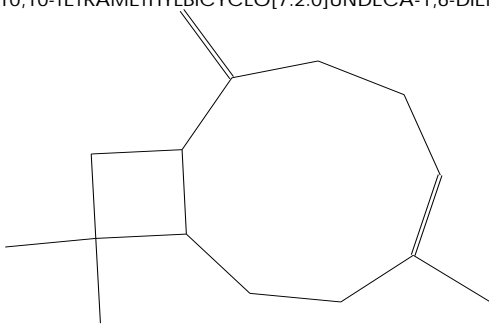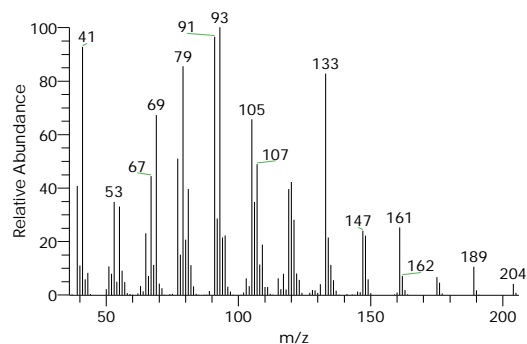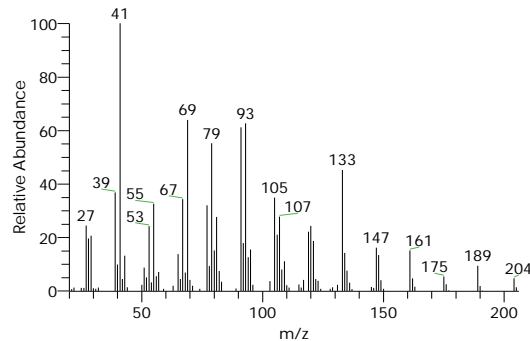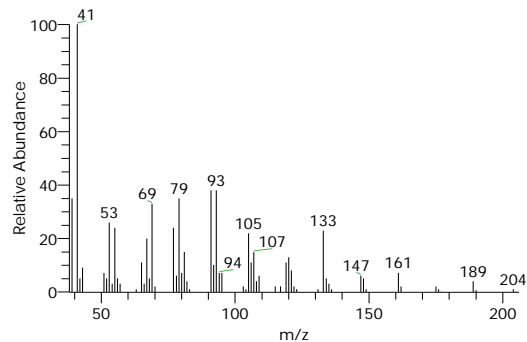

# My GC-MS Report

gerfa\_acetone #4176 RT: 18.01 AV: 1 NL: 1.48E8  
T: + c EI Full ms [50.000-650.000]

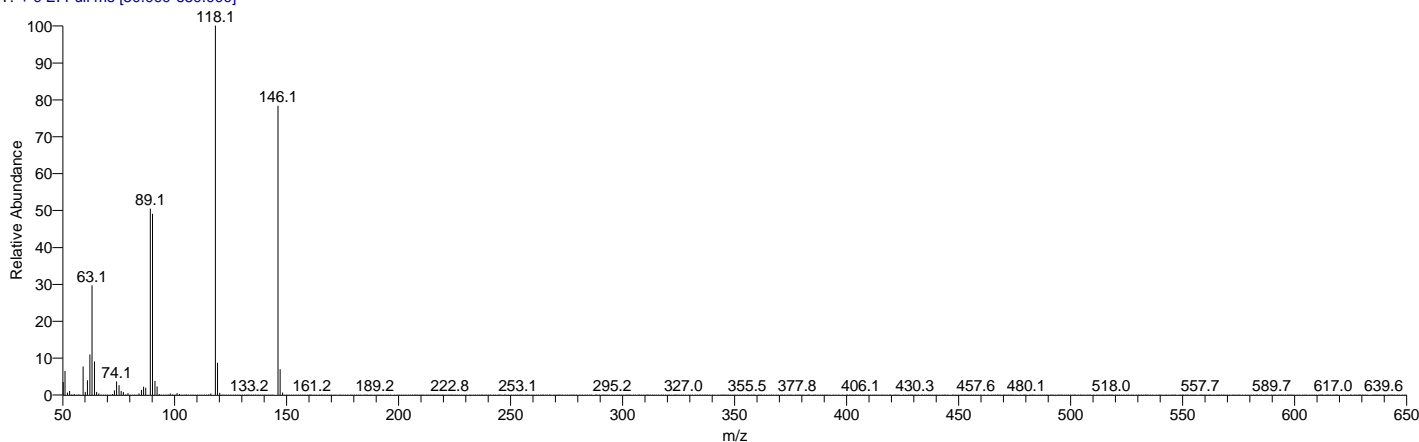

| RT    | Compound Name         | Area % | Molecular Formula                            | Molecular Weight | Cas #   | MF  | Library   |
|-------|-----------------------|--------|----------------------------------------------|------------------|---------|-----|-----------|
| 18.01 | 2H-1-BENZOPYRAN-2-ONE | 10.63  | C <sub>9</sub> H <sub>6</sub> O <sub>2</sub> | 146              | 91-64-5 | 973 | WileyRegi |
| 18.01 | Coumarin              | 10.63  | C <sub>9</sub> H <sub>6</sub> O <sub>2</sub> | 146              | 91-64-5 | 960 | stry8e    |
| 18.01 | Coumarin              | 10.63  | C <sub>9</sub> H <sub>6</sub> O <sub>2</sub> | 146              | 91-64-5 | 943 | replib    |

Compound Structure

Hit Spectrum

2H-1-BENZOPYRAN-2-ONE  
Formula C<sub>9</sub>H<sub>6</sub>O<sub>2</sub>, MW 146, CAS# 91-64-5, Entry# 30896  
CHROMEN-2-ONE

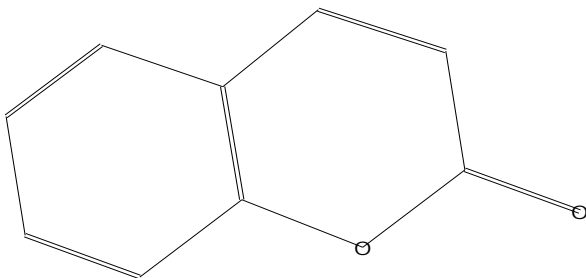

Coumarin  
Formula C<sub>9</sub>H<sub>6</sub>O<sub>2</sub>, MW 146, CAS# 91-64-5, Entry# 18483  
2H-1-Benzopyran-2-one

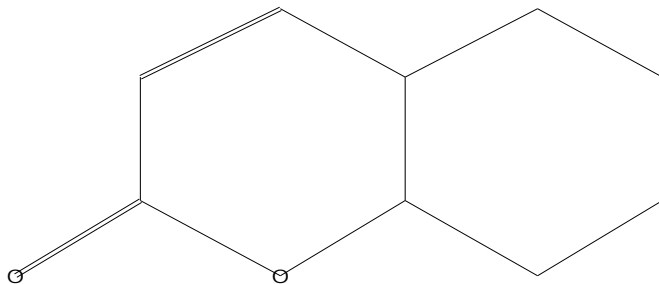

Coumarin  
Formula C<sub>9</sub>H<sub>6</sub>O<sub>2</sub>, MW 146, CAS# 91-64-5, Entry# 18488  
2H-1-Benzopyran-2-one

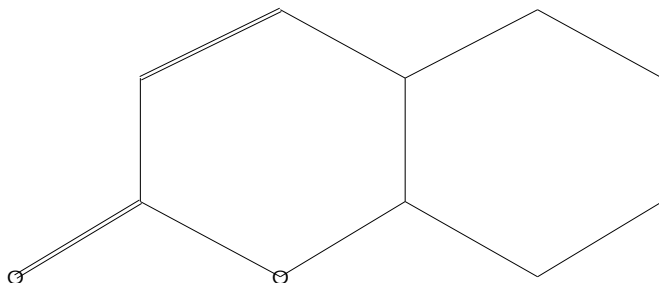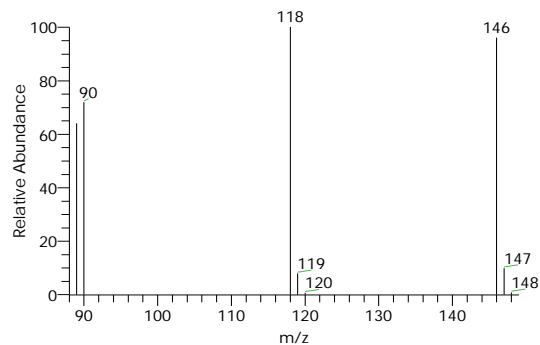

SI 948, RSI 960, replib, Entry# 18483, CAS# 91-64-5, Coumarin

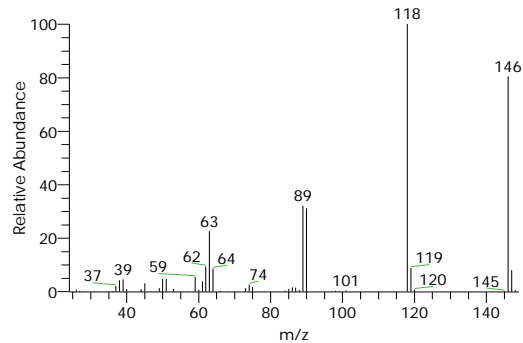

SI 943, RSI 943, replib, Entry# 18488, CAS# 91-64-5, Coumarin

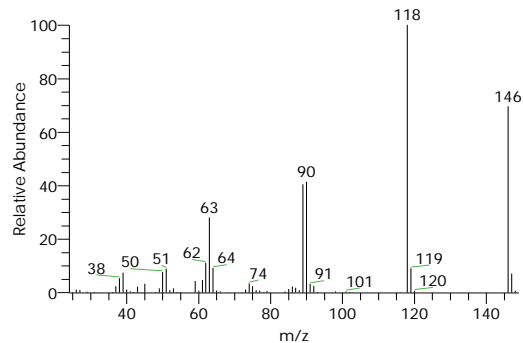

# My GC-MS Report

gerfa\_acetone #4220 RT: 18.15 AV: 1 NL: 1.06E8  
T: + c EI Full ms [50.000-650.000]

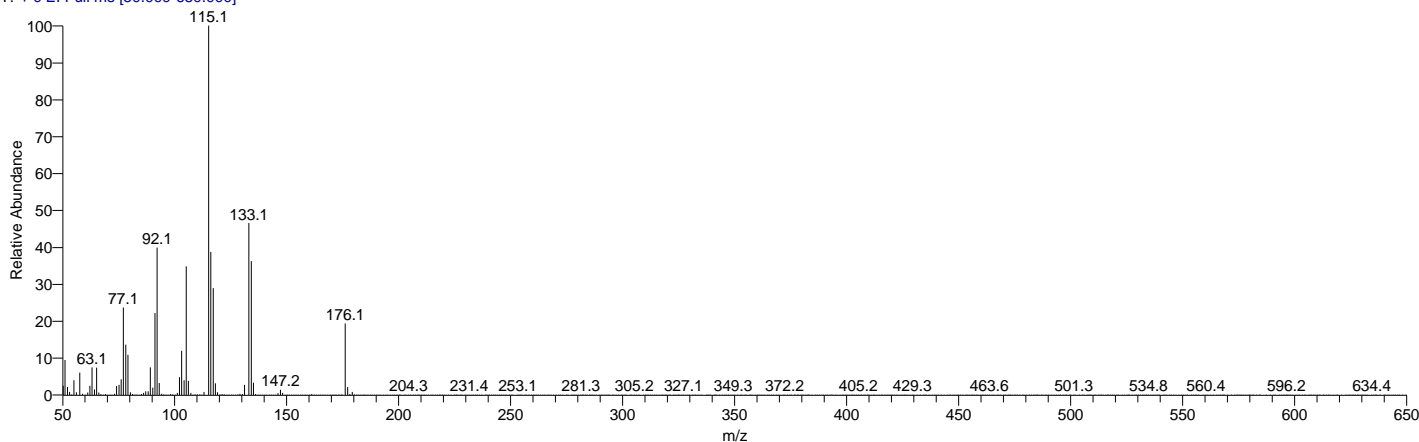

| RT    | Compound Name                     | Area % | Molecular Formula | Molecular Weight | Cas #      | MF  | Library         |
|-------|-----------------------------------|--------|-------------------|------------------|------------|-----|-----------------|
| 18.15 | Acetic acid, cinnamyl ester       | 4.35   | C11H12O2          | 176              | 103-54-8   | 946 | mainlib         |
| 18.15 | CINNAMYL ALCOHOL, ACETATE, (E)-   | 4.35   | C11H12O2          | 176              | 21040-45-9 | 965 | WileyRegistry8e |
| 18.15 | 2-PROPEN-1-OL, 3-PHENYL-, ACETATE | 4.35   | C11H12O2          | 176              | 103-54-8   | 932 | WileyRegistry8e |

Compound Structure

Hit Spectrum

Acetic acid, cinnamyl ester  
Formula C11H12O2, MW 176, CAS# 103-54-8, Entry# 11373  
2-Propen-1-ol, 3-phenyl-, acetate

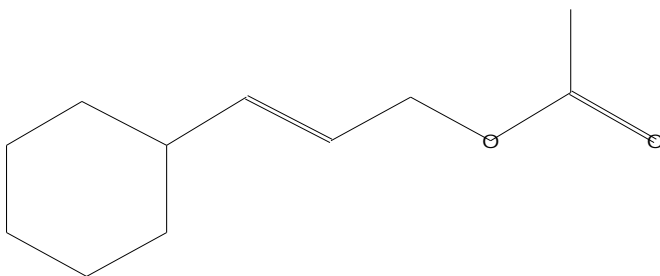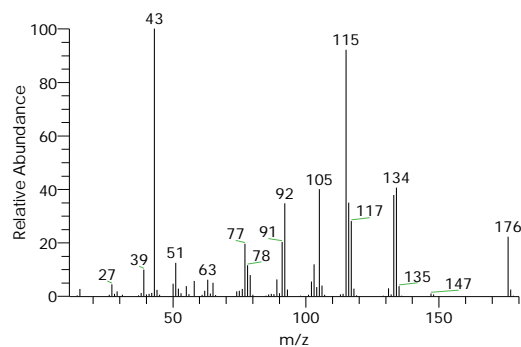

CINNAMYL ALCOHOL, ACETATE, (E)-  
Formula C11H12O2, MW 176, CAS# 21040-45-9, Entry# 59025  
(2E)-3-PHENYL-2-PROPENYL ACETATE #

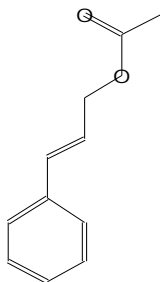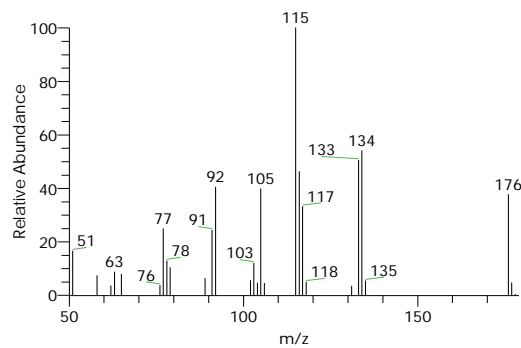

2-PROPEN-1-OL, 3-PHENYL-, ACETATE  
Formula C11H12O2, MW 176, CAS# 103-54-8, Entry# 58949  
ACETIC ACID CINNAMYL ESTER

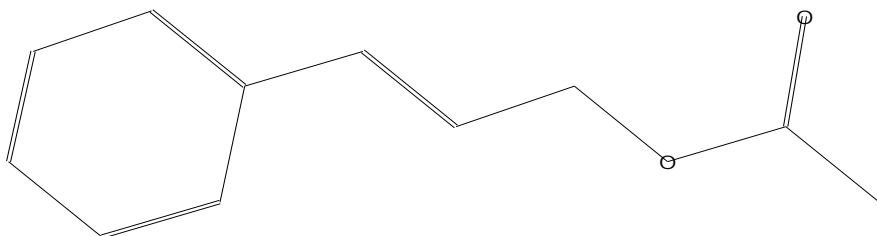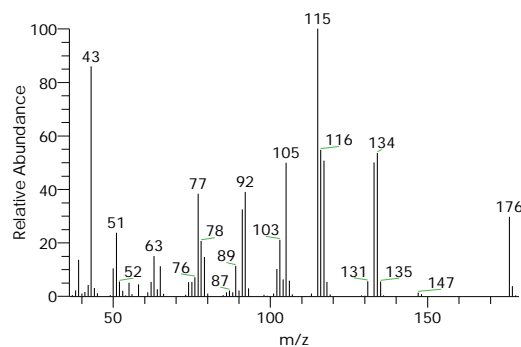

# My GC-MS Report

gerfa\_acetone #4430 RT: 18.86 AV: 1 NL: 1.74E7  
T: + c EI Full ms [50.000-650.000]

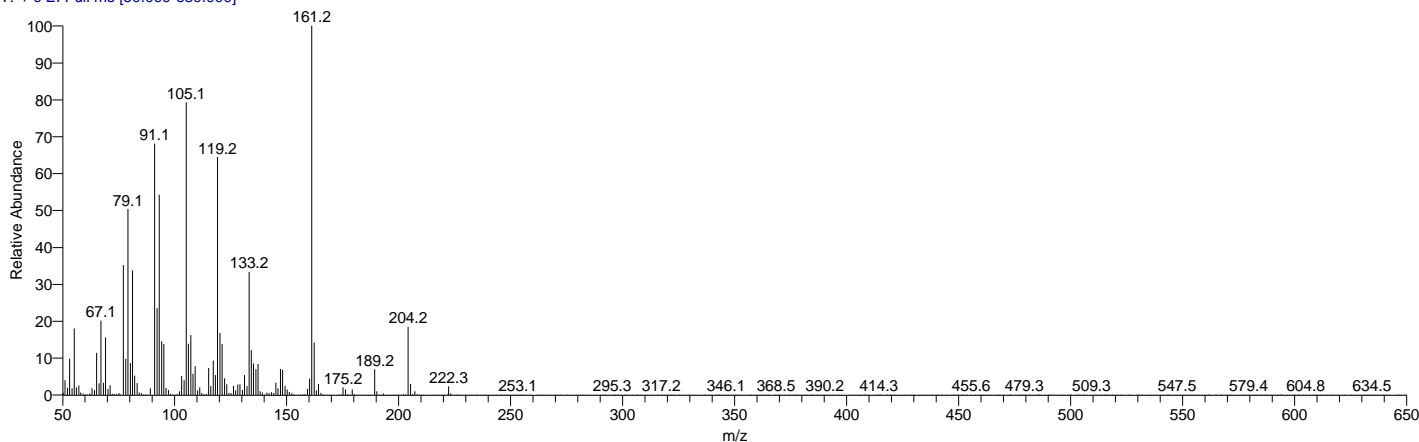

| RT    | Compound Name                                                        | Area % | Molecular Formula | Molecular Weight | Cas #      | MF  | Library |
|-------|----------------------------------------------------------------------|--------|-------------------|------------------|------------|-----|---------|
| 18.86 | ç-Muurolene                                                          | 1.00   | C15H24            | 204              | 30021-74-0 | 933 | replib  |
| 18.86 | ç-Muurolene                                                          | 1.00   | C15H24            | 204              | 30021-74-0 | 933 | replib  |
| 18.86 | Naphthalene, 1,2,4a,5,6,8a-hexahydro-4,7-dimethyl-1-(1-methylethyl)- | 1.00   | C15H24            | 204              | 483-75-0   | 954 | replib  |

## Compound Structure

## Hit Spectrum

ç-Muurolene  
Formula C15H24, MW 204, CAS# 30021-74-0, Entry# 24906

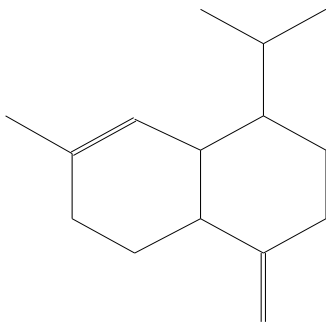

ç-Muurolene  
Formula C15H24, MW 204, CAS# 30021-74-0, Entry# 24843

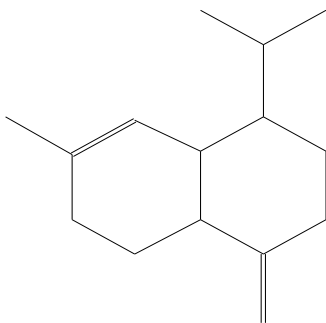

SI 916, RSI 933, replib, Entry# 24906, CAS# 30021-74-0, ç-Muurolene

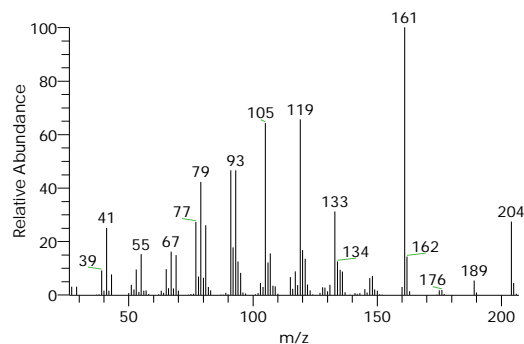

SI 915, RSI 933, replib, Entry# 24843, CAS# 30021-74-0, ç-Muurolene

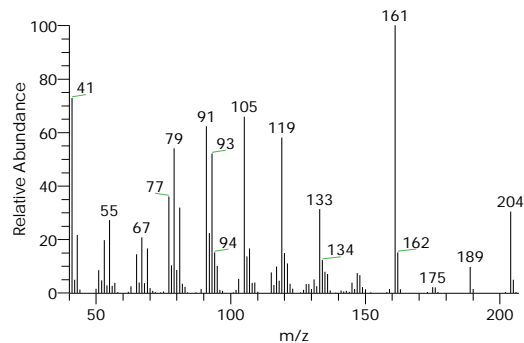

# My GC-MS Report

Compound Structure

Hit Spectrum

Naphthalene, 1,2,4a,5,6,8a-hexahydro-4,7-dimethyl-1-(1-methylethyl)-  
Formula C<sub>15</sub>H<sub>24</sub>, MW 204, CAS# 483-75-0, Entry# 24889  
1-Isopropyl-4,7-dimethyl-1,2,4a,5,6,8a-hexahydronaphthalene #

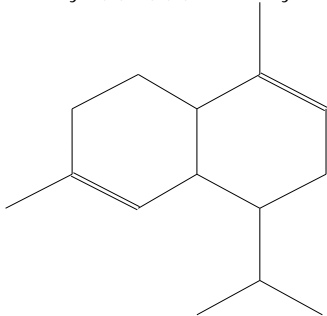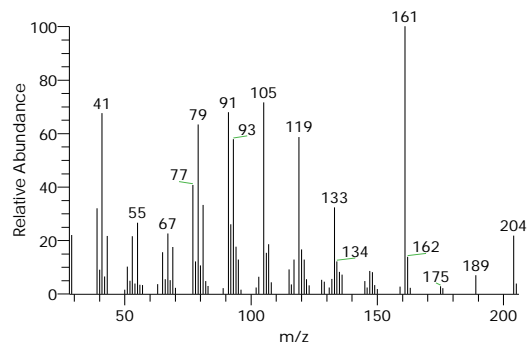

gerfa\_acetone #4564 RT: 19.31 AV: 1 NL: 3.12E6  
T: + c EI Full ms [50.000-650.000]

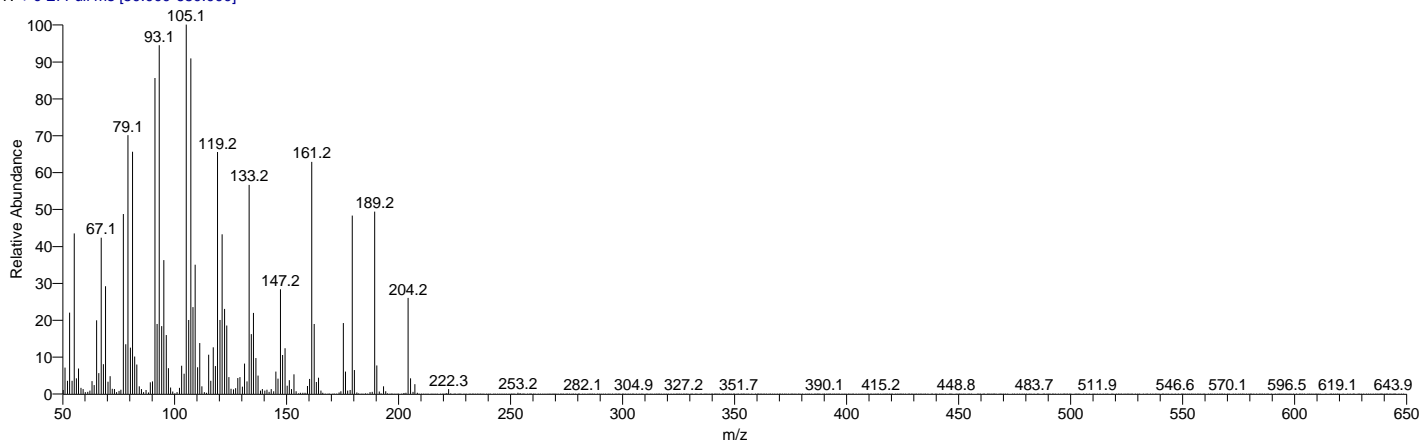

| RT    | Compound Name                                                                                 | Area % | Molecular Formula               | Molecular Weight | Cas #      | MF  | Library         |
|-------|-----------------------------------------------------------------------------------------------|--------|---------------------------------|------------------|------------|-----|-----------------|
| 19.31 | Azulene, 1,2,3,3a,4,5,6,7-octahydro-1,4-dimethyl-7-(1-methylethenyl)-, [1R-(1à,3aà,4à,7à)]-   | 0.28   | C <sub>15</sub> H <sub>24</sub> | 204              | 22567-17-5 | 918 | replib          |
| 19.31 | Aromandendrene                                                                                | 0.28   | C <sub>15</sub> H <sub>24</sub> | 204              | 489-39-4   | 905 | replib          |
| 19.31 | NAPHTHALENE, 1,2,3,5,6,7,8,8A-OCTAHYDRO-1,8A-DIMETHYL-7-(1-METHYLETHENYL)-, [1R-(1à,7à,8Aà)]- | 0.28   | C <sub>15</sub> H <sub>24</sub> | 204              | 4630-07-3  | 891 | WileyRegistry8e |

Compound Structure

Hit Spectrum

Azulene, 1,2,3,3a,4,5,6,7-octahydro-1,4-dimethyl-7-(1-methylethenyl)-, [1R-(1à,3aà,4à,7à)]-  
Formula C<sub>15</sub>H<sub>24</sub>, MW 204, CAS# 22567-17-5, Entry# 1321  
1à,4àH,10àH-Guaia-5,11-diene

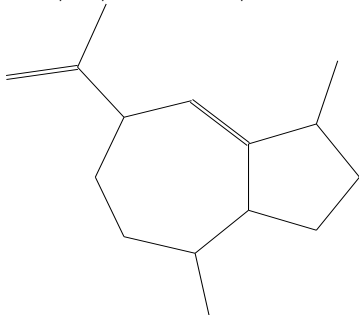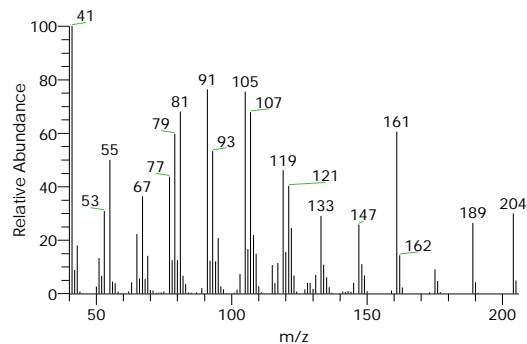

# My GC-MS Report

## Compound Structure

## Hit Spectrum

Aromandendrene  
Formula C<sub>15</sub>H<sub>24</sub>, MW 204, CAS# 489-39-4, Entry# 13310

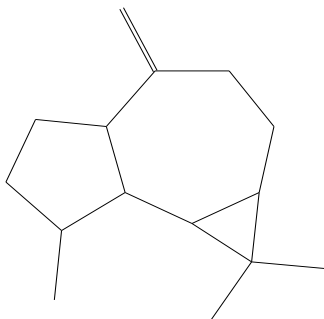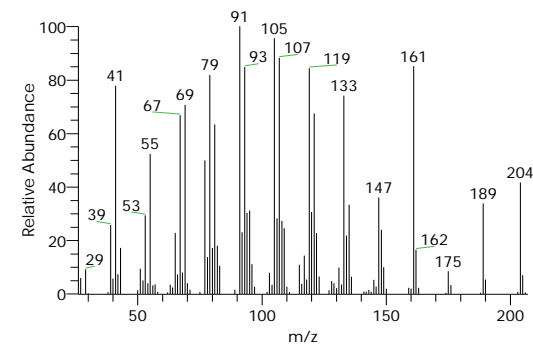

Formula C<sub>15</sub>H<sub>24</sub>, MW 204, CAS# 4630-07-3, Entry# 89318  
3-ISOPROPENYL-4A,5-DIMETHYL-1,2,3,4,4A,5,6,7-OCTAHYDRONAPHTHALENE #

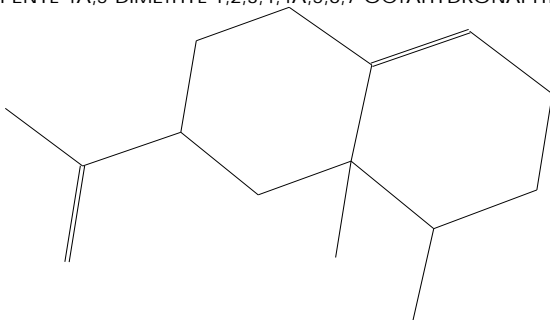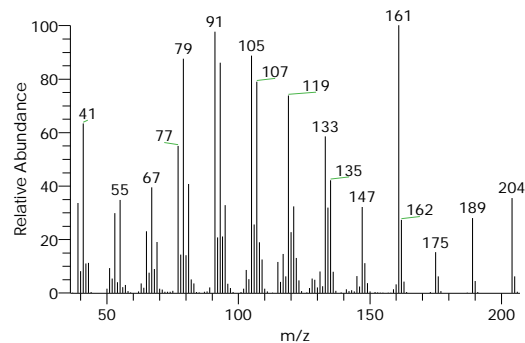

gerfa\_acetone #4613 RT: 19.47 AV: 1 NL: 9.29E7  
T: + c EI Full ms [50.000-650.000]

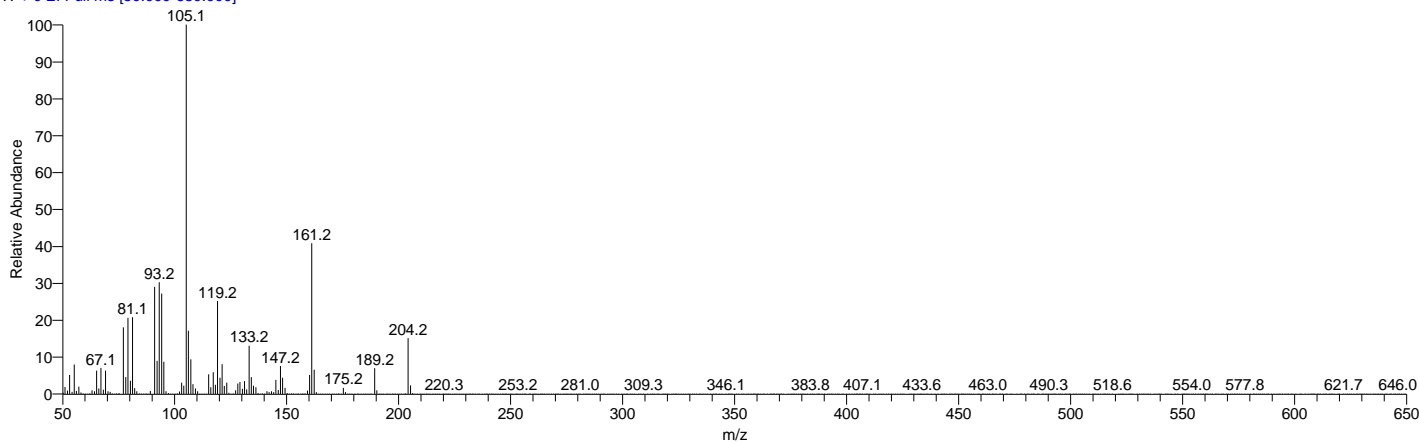

| RT    | Compound Name                                                                       | Area % | Molecular Formula               | Molecular Weight | Cas #      | MF  | Library         |
|-------|-------------------------------------------------------------------------------------|--------|---------------------------------|------------------|------------|-----|-----------------|
| 19.47 | à-Muurolene                                                                         | 3.92   | C <sub>15</sub> H <sub>24</sub> | 204              | 10208-80-7 | 954 | replib          |
| 19.47 | à-Muurolene                                                                         | 3.92   | C <sub>15</sub> H <sub>24</sub> | 204              | 31983-22-9 | 959 | replib          |
| 19.47 | NAPHTHALENE, 1,2,4A,5,6,8A-HEXAHYDRO-4,7-DIMETHYL-1-(1-METHYLETHYL)-, (1à,4Aà,8Aà)- | 3.92   | C <sub>15</sub> H <sub>24</sub> | 204              | 31983-22-9 | 930 | WileyRegistry8e |

# My GC-MS Report

Compound Structure

Hit Spectrum

à-Murolene

Formula C<sub>15</sub>H<sub>24</sub>, MW 204, CAS# 10208-80-7, Entry# 16423

Naphthalene, 1,2,4a,5,6,8a-hexahydro-4,7-dimethyl-1-(1-methylethyl)-, (1S,4aS,8aR)-

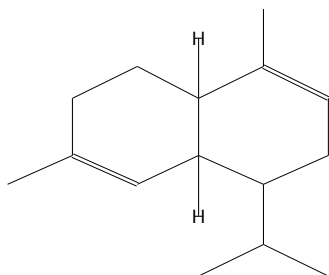

SI 954, RSI 954, replib, Entry# 16423, CAS# 10208-80-7, à-Murolene

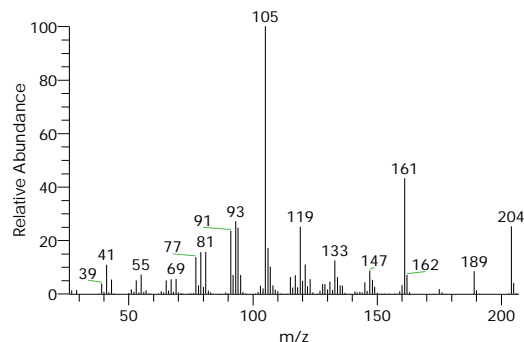

à-Murolene

Formula C<sub>15</sub>H<sub>24</sub>, MW 204, CAS# 31983-22-9, Entry# 16421

[1à,4aà,8aà]-1,2,4a,5,6,8a-hexahydro-4,7-dimethyl-1-[1-methylethyl]naphthalene

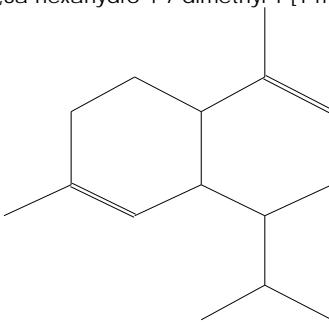

SI 953, RSI 959, replib, Entry# 16421, CAS# 31983-22-9, à-Murolene

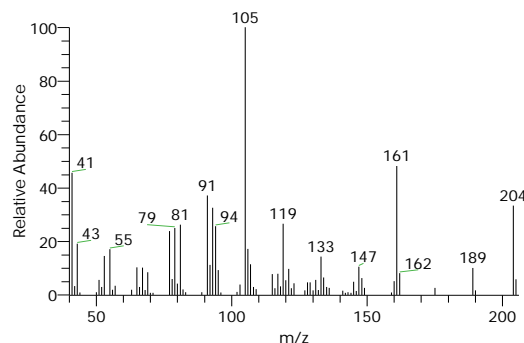

NAPHTHALENE, 1,2,4A,5,6,8A-HEXAHYDRO-4,7-DIMETHYL-1-(1-METHYLETHYL)-, (1à,4Aà,8Aà)-

Formula C<sub>15</sub>H<sub>24</sub>, MW 204, CAS# 31983-22-9, Entry# 89350

NAPHTHALENE, 1,2,4Aa,5,6,8Aa-HEXAHYDRO-1à-ISOPROPYL-4,7-DIMETHYL-

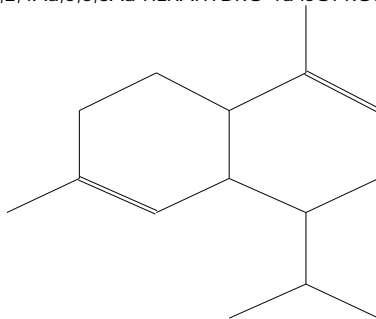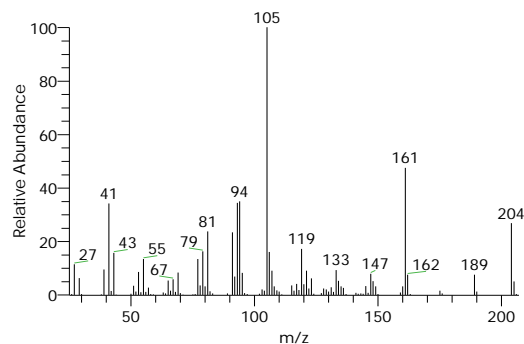

gerfa\_acetone #4783 RT: 20.04 AV: 1 NL: 5.97E7  
T: + c EI Full ms [50.000-650.000]

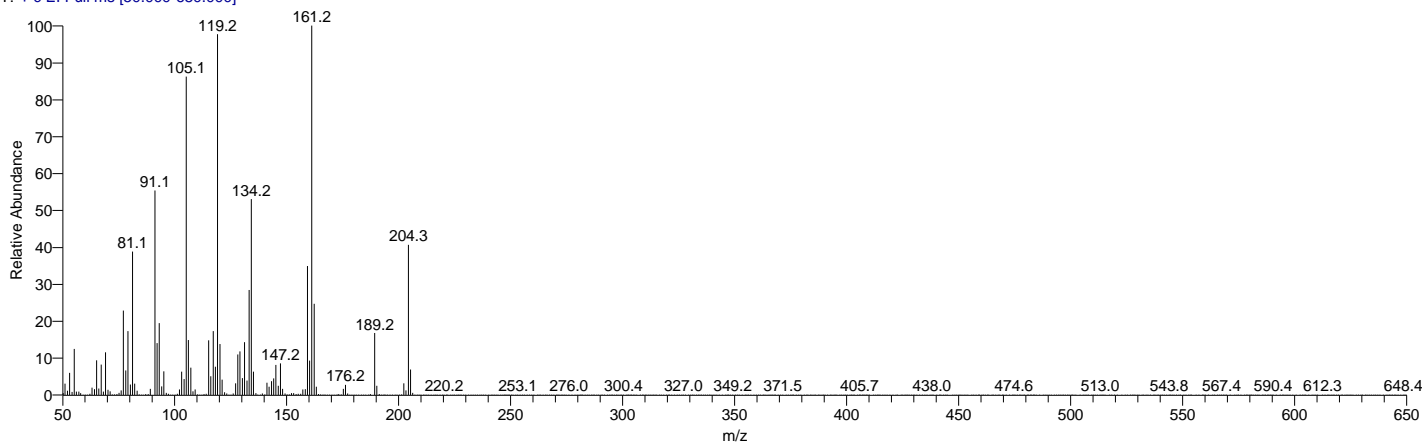

| RT    | Compound Name                                                                  | Area % | Molecular Formula               | Molecular Weight | Cas #      | MF  | Library         |
|-------|--------------------------------------------------------------------------------|--------|---------------------------------|------------------|------------|-----|-----------------|
| 20.04 | NAPHTHALENE, 1,2,3,5,6,8A-HEXAHYDRO-4,7-DIMETHYL-1-(1-METHYLETHYL)-, (1S-CIS)- | 4.64   | C <sub>15</sub> H <sub>24</sub> | 204              | 483-76-1   | 937 | WileyRegistry8e |
| 20.04 | 1-Isopropyl-4,7-dimethyl-1,2,3,5,6,8a-hexahydronaphthalene                     | 4.64   | C <sub>15</sub> H <sub>24</sub> | 204              | 16729-01-4 | 920 | mainlib         |

# My GC-MS Report

| RT                 | Compound Name                                                                  | Area % | Molecular Formula | Molecular Weight | Cas #    | MF  | Library         |
|--------------------|--------------------------------------------------------------------------------|--------|-------------------|------------------|----------|-----|-----------------|
| 20.04              | NAPHTHALENE, 1,2,3,5,6,8A-HEXAHYDRO-4,7-DIMETHYL-1-(1-METHYLETHYL)-, (1S-CIS)- | 4.64   | C15H24            | 204              | 483-76-1 | 895 | WileyRegistry8e |
| Compound Structure |                                                                                |        |                   | Hit Spectrum     |          |     |                 |

NAPHTHALENE, 1,2,3,5,6,8A-HEXAHYDRO-4,7-DIMETHYL-1-(1-METHYLETHYL)-, (1S-CIS)-  
Formula C15H24, MW 204, CAS# 483-76-1, Entry# 89277  
1-ISOPROPYL-4,7-DIMETHYL-1,2,3,5,6,8A-HEXAHYDRONAPHTHALENE #

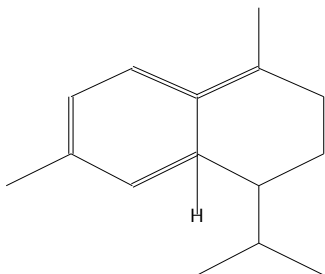

1-Isopropyl-4,7-dimethyl-1,2,3,5,6,8a-hexahydronaphthalene  
Formula C15H24, MW 204, CAS# 16729-01-4, Entry# 150583  
Cadina-1(10),4-diene

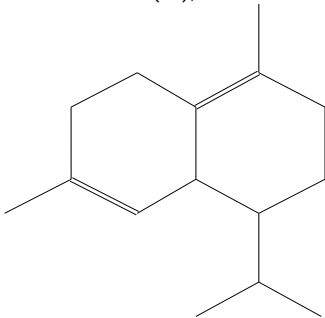

NAPHTHALENE, 1,2,3,5,6,8A-HEXAHYDRO-4,7-DIMETHYL-1-(1-METHYLETHYL)-, (1S-CIS)-  
Formula C15H24, MW 204, CAS# 483-76-1, Entry# 89273  
1-ISOPROPYL-4,7-DIMETHYL-1,2,3,5,6,8A-HEXAHYDRONAPHTHALENE #

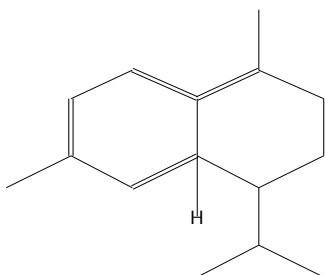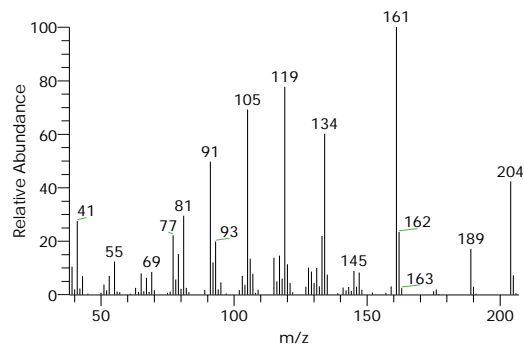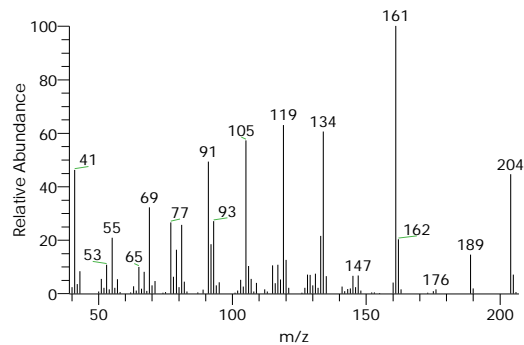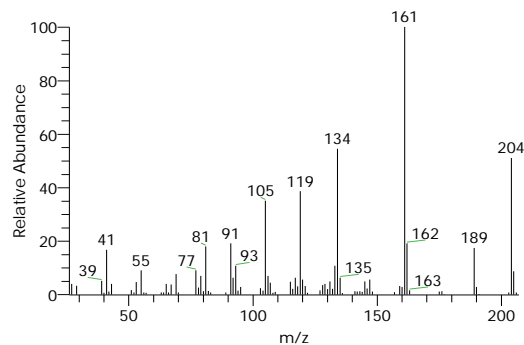

gerfa\_acetone #4838 RT: 20.23 AV: 1 NL: 9.28E7  
T: + c EI Full ms [50.000-650.000]

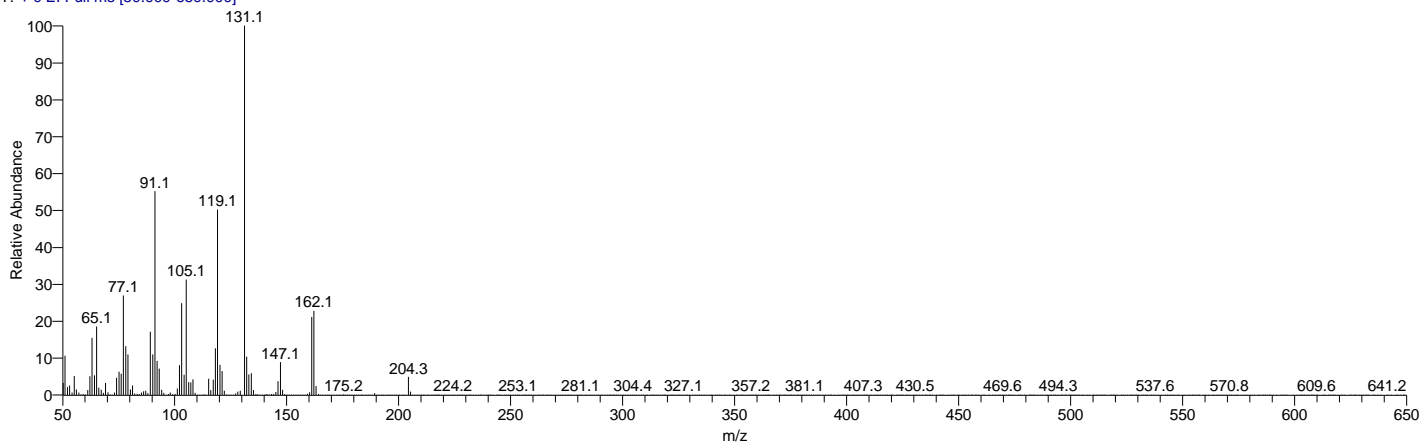

# My GC-MS Report

| RT    | Compound Name                              | Area % | Molecular Formula | Molecular Weight | Cas #     | MF  | Library         |
|-------|--------------------------------------------|--------|-------------------|------------------|-----------|-----|-----------------|
| 20.23 | 2-Propenal, 3-(2-methoxyphenyl)-           | 5.04   | C10H10O2          | 162              | 1504-74-1 | 881 | mainlib         |
| 20.23 | (2E)-3-(2-METHOXYPHENYL)-2-PROPENAL<br>L # | 5.04   | C10H10O2          | 162              | 1504-74-1 | 891 | WileyRegistry8e |
| 20.23 | 2-PROPENAL, 3-(4-METHOXYPHENYL)-           | 5.04   | C10H10O2          | 162              | 1963-36-6 | 880 | WileyRegistry8e |

## Compound Structure

## Hit Spectrum

2-Propenal, 3-(2-methoxyphenyl)-  
Formula C10H10O2, MW 162, CAS# 1504-74-1, Entry# 115637  
Cinnamaldehyde, o-methoxy-

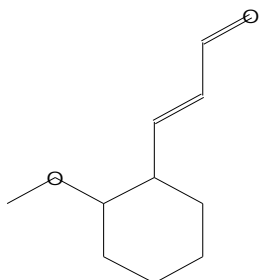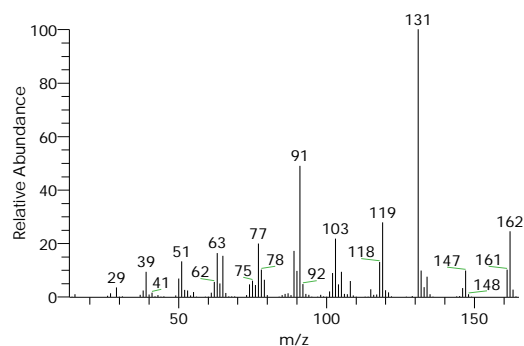

(2E)-3-(2-METHOXYPHENYL)-2-PROPENAL #  
Formula C10H10O2, MW 162, CAS# 1504-74-1, Entry# 45156  
(2E)-3-(2-METHOXYPHENYL)-2-PROPENAL

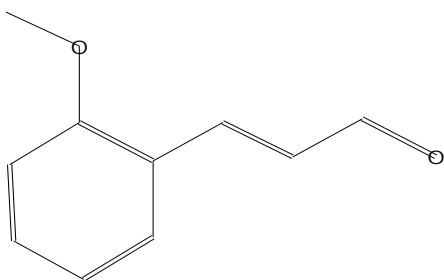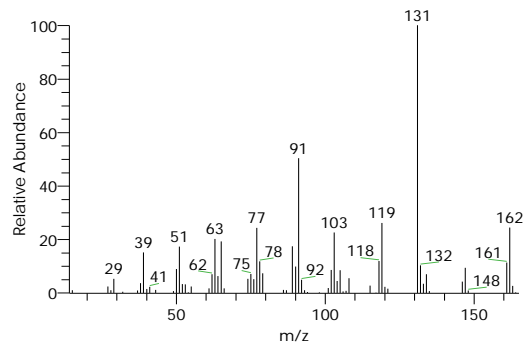

2-PROPENAL, 3-(4-METHOXYPHENYL)-  
Formula C10H10O2, MW 162, CAS# 1963-36-6, Entry# 45236  
CINNAMALDEHYDE, P-METHOXY-

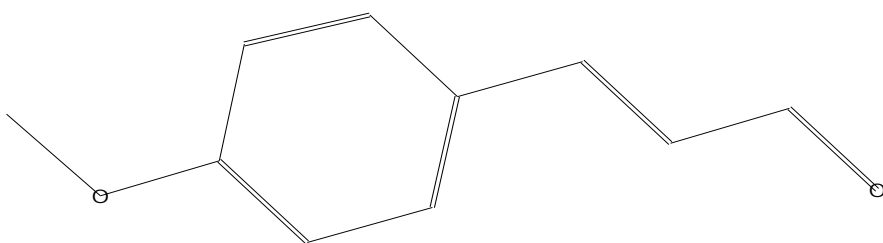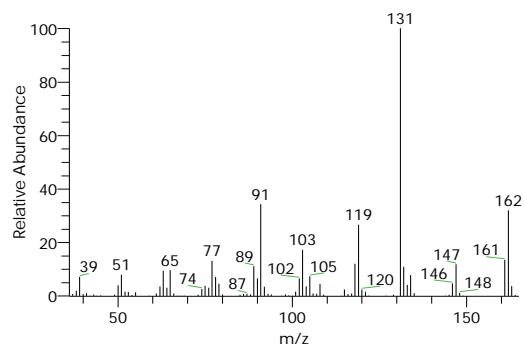

# My GC-MS Report

gerfa\_acetone #4911 RT: 20.47 AV: 1 NL: 1.43E7  
T: + c EI Full ms [50.000-650.000]

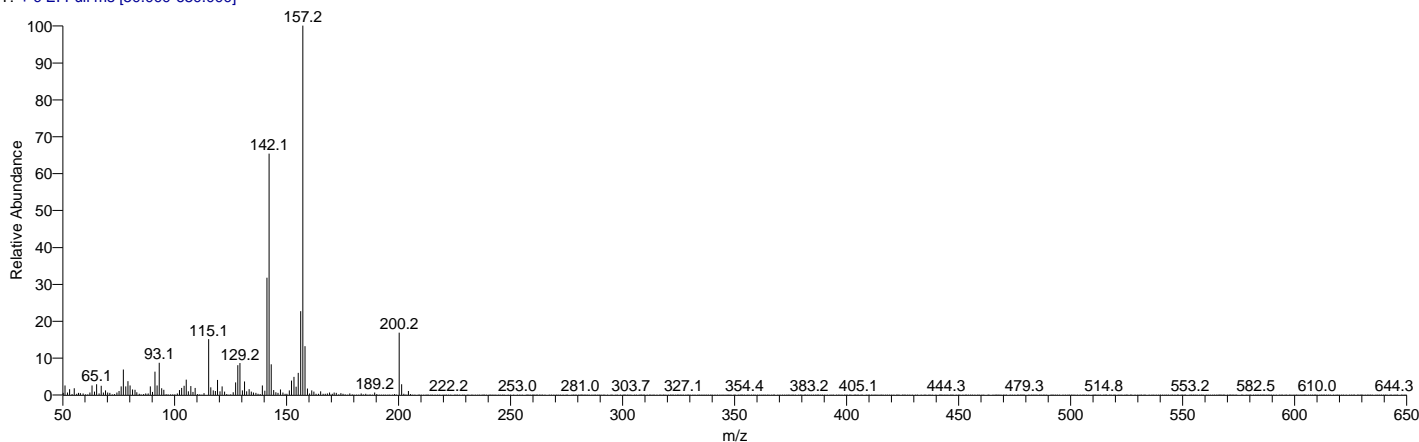

| RT    | Compound Name                                                  | Area % | Molecular Formula | Molecular Weight | Cas #      | MF  | Library         |
|-------|----------------------------------------------------------------|--------|-------------------|------------------|------------|-----|-----------------|
| 20.47 | 4-Isopropyl-6-methyl-1-methylene-1,2,3,4-tetrahydronaphthalene | 0.44   | C15H20            | 200              | 50277-34-4 | 926 | mainlib         |
| 20.47 | 1-ISOPROPYL-4,7-DIMETHYL-1,2-DIHYDRO NAPHTHALENE #             | 0.44   | C15H20            | 200              | 21391-99-1 | 950 | WileyRegistry8e |
| 20.47 | 1,1,6-TRIMETHYL-1,2-DIHYDRO NAPHTHALENE                        | 0.44   | C13H16            | 172              | NA         | 946 | WileyRegistry8e |

Compound Structure

Hit Spectrum

4-Isopropyl-6-methyl-1-methylene-1,2,3,4-tetrahydronaphthalene  
Formula C15H20, MW 200, CAS# 50277-34-4, Entry# 146807  
Naphthalene, 1,2,3,4-tetrahydro-6-methyl-1-methylene-4-(1-methylethyl)-

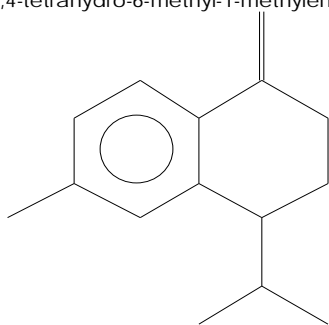

1-ISOPROPYL-4,7-DIMETHYL-1,2-DIHYDRONAPHTHALENE #  
Formula C15H20, MW 200, CAS# 21391-99-1, Entry# 85030  
α-CALACORENE

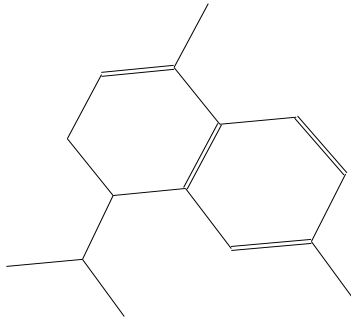

1,1,6-TRIMETHYL-1,2-DIHYDRO NAPHTHALENE  
Formula C13H16, MW 172, CAS# NA, Entry# 56092  
CALACORENE

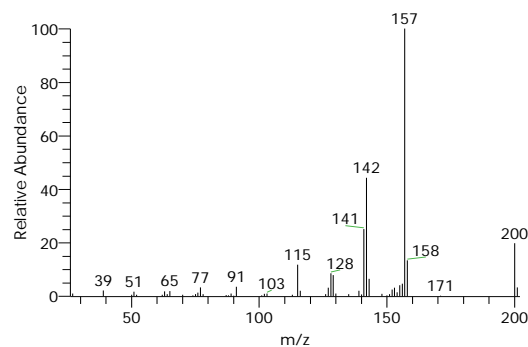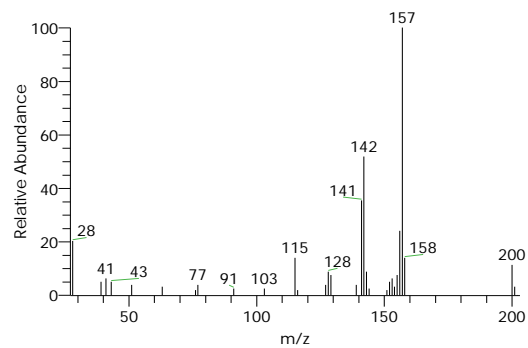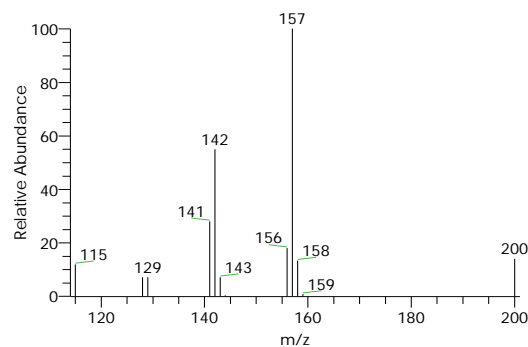

# My GC-MS Report

gerfa\_acetone #5213 RT: 21.48 AV: 1 NL: 2.86E7  
T: + c EI Full ms [50.000-650.000]

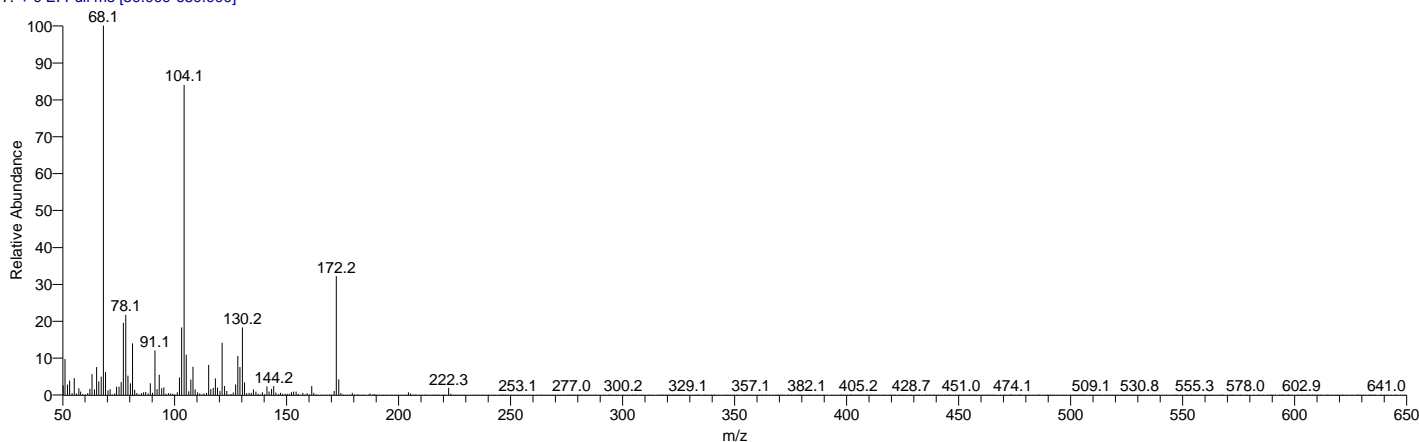

| RT    | Compound Name                          | Area % | Molecular Formula | Molecular Weight | Cas #   | MF  | Library   |
|-------|----------------------------------------|--------|-------------------|------------------|---------|-----|-----------|
| 21.48 | 2-PROPANONE, 1-[2-(1-PROPYNYL)PHENYL]- | 1.05   | C12H12O           | 172              | 93769-2 | 901 | WileyRegi |
| 21.48 | 1-Phenylbicyclo(4.1.0)heptane          | 1.05   | C13H16            | 172              | 2415-8  | 676 | stry8e    |
| 21.48 | Benzene, [(cyclohex-1-en-1-yl)methyl]- | 1.05   | C13H16            | 172              | 4714-0  | 693 | mainlib   |
|       |                                        |        |                   |                  | 9-4     |     |           |

Compound Structure

Hit Spectrum

2-PROPANONE, 1-[2-(1-PROPYNYL)PHENYL]-  
Formula C12H12O, MW 172, CAS# 93769-24-5, Entry# 55965  
1-[2-(1-PROPYN-1-YL)PHENYL]-2-PROPANOL

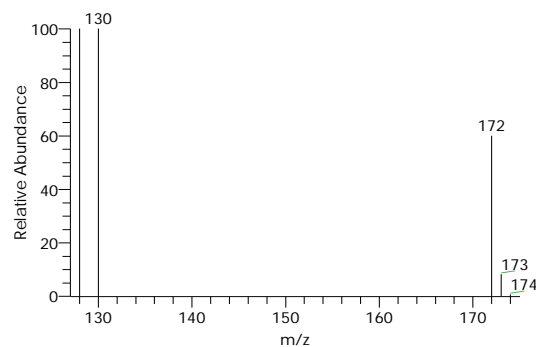

1-Phenylbicyclo(4.1.0)heptane  
Formula C13H16, MW 172, CAS# 2415-82-9, Entry# 113978  
\$:28GJUWIDAFIWWNSH-UHFFFAOYSA-N

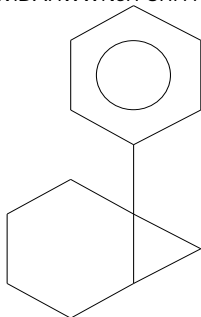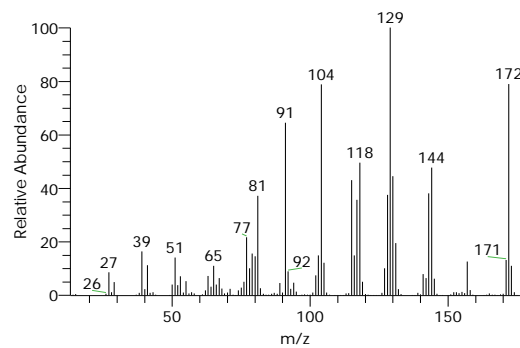

Benzene, [(cyclohex-1-en-1-yl)methyl]-  
Formula C13H16, MW 172, CAS# 4714-09-4, Entry# 50602  
(1-Cyclohexen-1-ylmethyl)benzene #

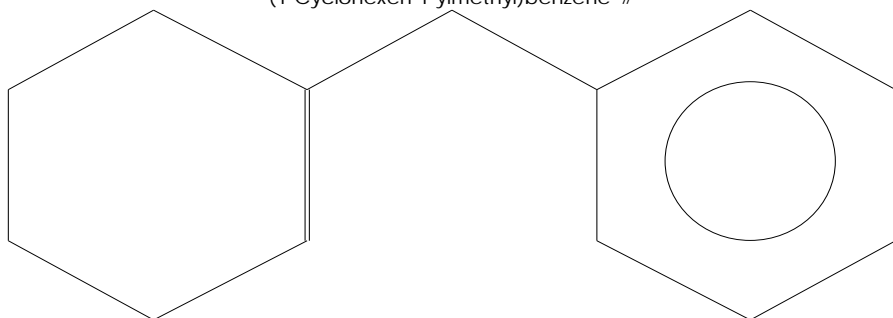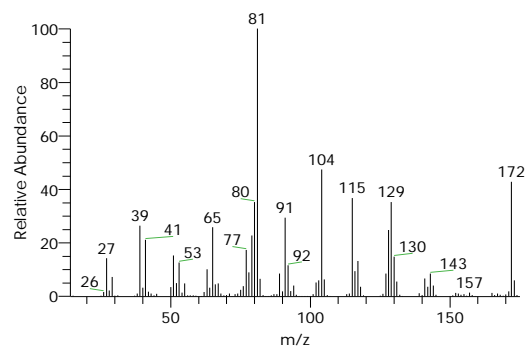

# My GC-MS Report

gerfa\_acetone #5510 RT: 22.48 AV: 1 NL: 9.29E6  
T: + c EI Full ms [50.000-650.000]

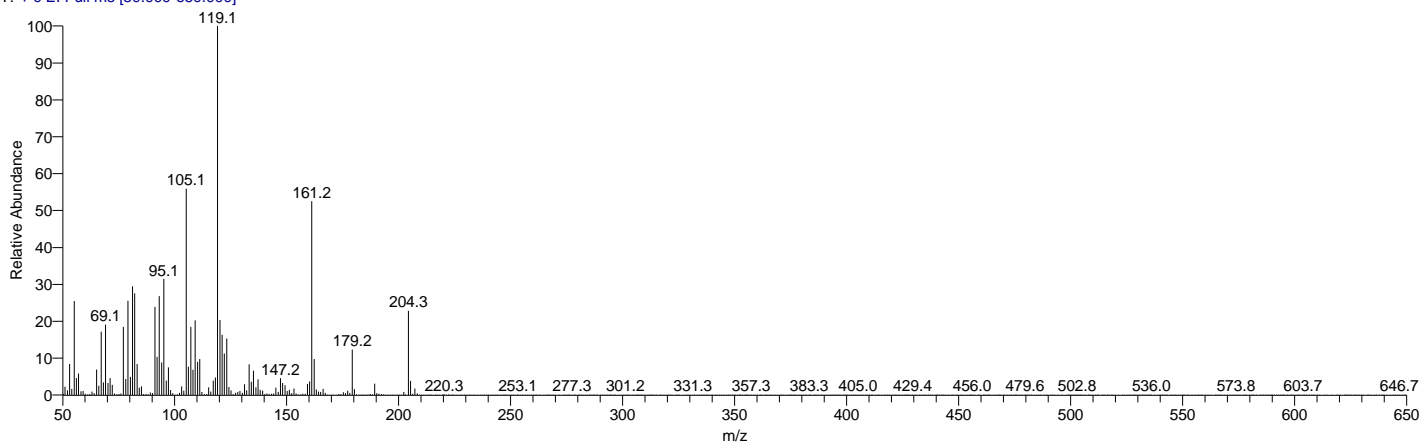

| RT    | Compound Name       | Area % | Molecular Formula | Molecular Weight | Cas #   | MF  | Library |
|-------|---------------------|--------|-------------------|------------------|---------|-----|---------|
| 22.48 | Di-epi-1,10-cubenol | 0.41   | C15H26O           | 222              | 73365-7 | 938 | mainlib |
| 22.48 | Epicubenol          | 0.41   | C15H26O           | 222              | 19912-6 | 931 | mainlib |
| 22.48 | Cubenol             | 0.41   | C15H26O           | 222              | 21284-2 | 912 | mainlib |

## Compound Structure

## Hit Spectrum

### Di-epi-1,10-cubenol

Formula C15H26O, MW 222, CAS# 73365-77-2, Entry# 100531  
(1S,4S,4aS,8aR)-1-Isopropyl-4,7-dimethyl-1,3,4,5,6,8a-hexahydronaphthalen-4a(2H)-ol

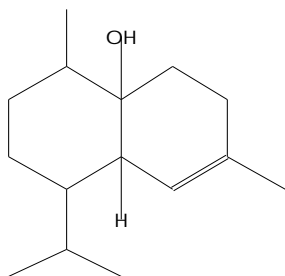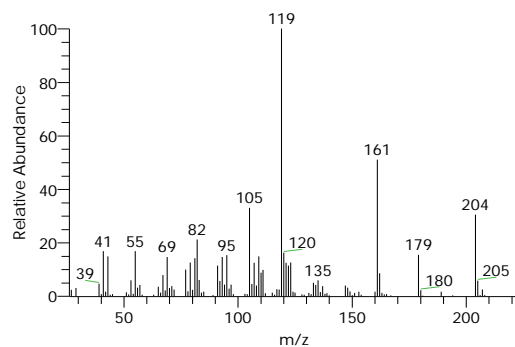

### Epicubenol

Formula C15H26O, MW 222, CAS# 19912-67-5, Entry# 100535  
(1S,4R,4aS,8aR)-1-Isopropyl-4,7-dimethyl-1,2,3,4,4a,5,6,8a-octahydronaphthalen-4a-ol

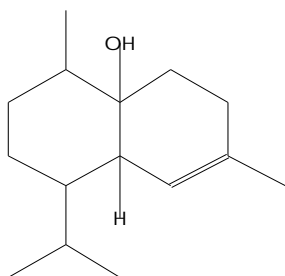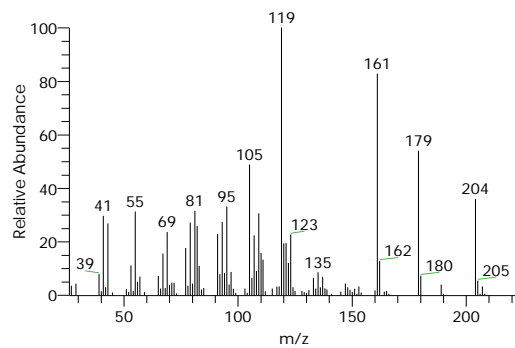

### Cubenol

Formula C15H26O, MW 222, CAS# 21284-22-0, Entry# 98767  
1-Isopropyl-4,7-dimethyl-1,3,4,5,6,8a-hexahydro-4a(2H)-naphthalenol-, [1S-(1à,4á,4aâ,8aà)]-

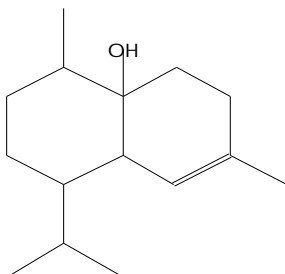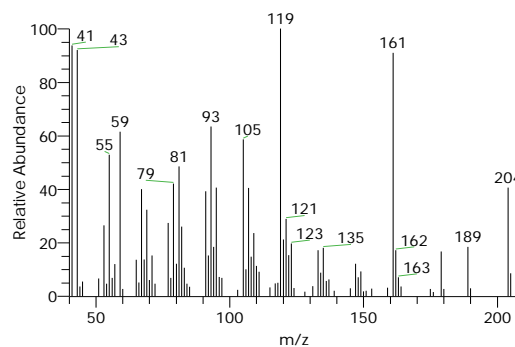

# My GC-MS Report

gerfa\_acetone #5606 RT: 22.80 AV: 1 NL: 1.29E7  
T: + c EI Full ms [50.000-650.000]

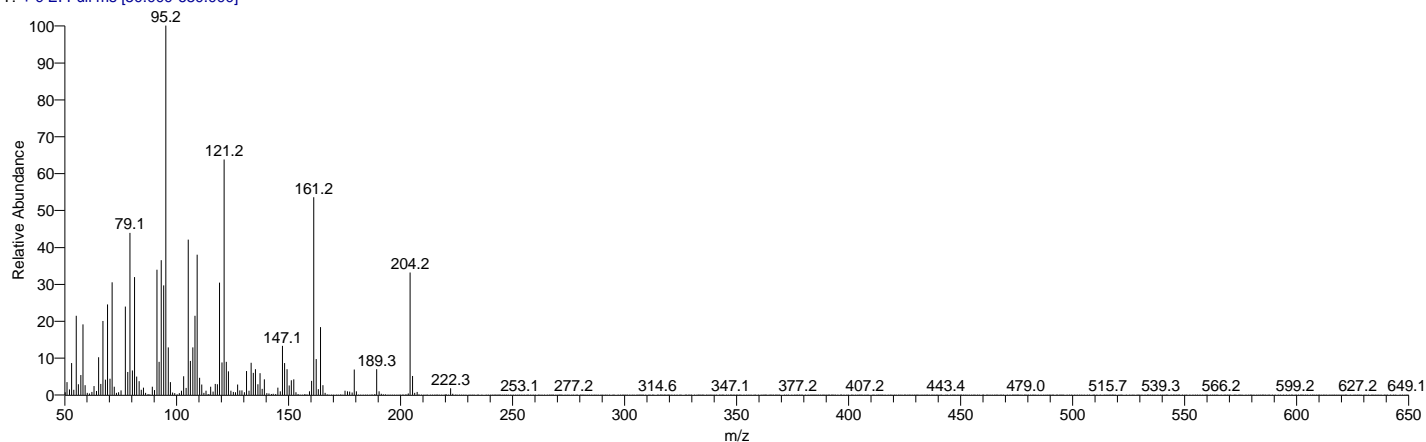

| RT    | Compound Name  | Area % | Molecular Formula | Molecular Weight | Cas #      | MF  | Library |
|-------|----------------|--------|-------------------|------------------|------------|-----|---------|
| 22.80 | .tau.-Muurolol | 0.67   | C15H26O           | 222              | 19912-62-0 | 944 | replib  |
| 22.80 | à-Cadinol      | 0.67   | C15H26O           | 222              | 481-34-5   | 927 | replib  |
| 22.80 | .tau.-Muurolol | 0.67   | C15H26O           | 222              | 19912-62-0 | 911 | mainlib |

## Compound Structure

## Hit Spectrum

.tau.-Muurolol

Formula C15H26O, MW 222, CAS# 19912-62-0, Entry# 3342

4-Isopropyl-1,6-dimethyl-1,2,3,4,4a,7,8,8a-octahydro-1-naphthalenol-, [1S-(1à,4à,4aà,8aà)]-

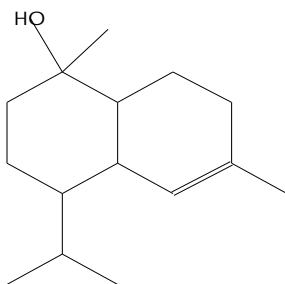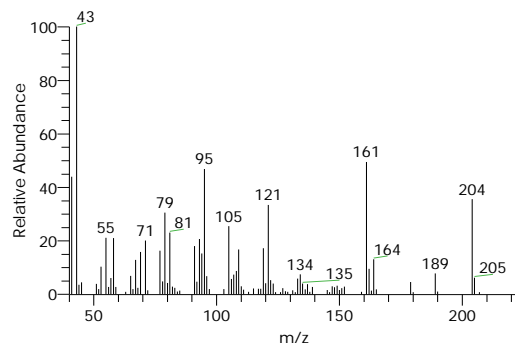

SI 926, RSI 944, replib, Entry# 3342, CAS# 19912-62-0, .tau.-Muurolol

à-Cadinol

Formula C15H26O, MW 222, CAS# 481-34-5, Entry# 3029

4-Isopropyl-1,6-dimethyl-1,2,3,4,4a,7,8,8a-octahydro-1-naphthalenol #

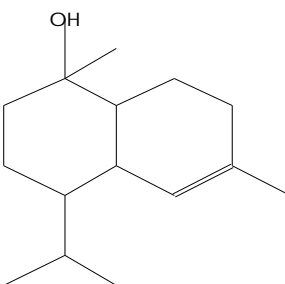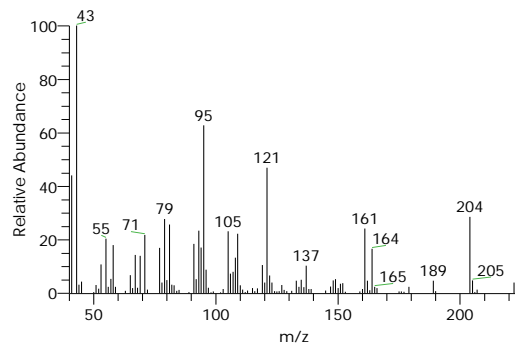

SI 916, RSI 927, replib, Entry# 3029, CAS# 481-34-5, à-Cadinol

.tau.-Muurolol

Formula C15H26O, MW 222, CAS# 19912-62-0, Entry# 68534

4-Isopropyl-1,6-dimethyl-1,2,3,4,4a,7,8,8a-octahydro-1-naphthalenol-, [1S-(1à,4à,4aà,8aà)]-

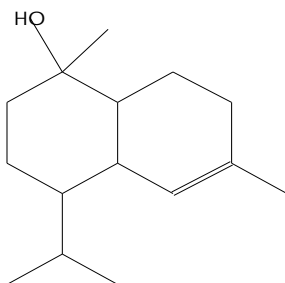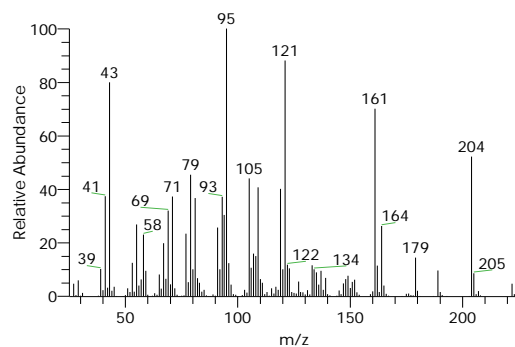

# My GC-MS Report

gerfa\_acetone #5635 RT: 22.90 AV: 1 NL: 9.01E6  
T: + c EI Full ms [50.000-650.000]

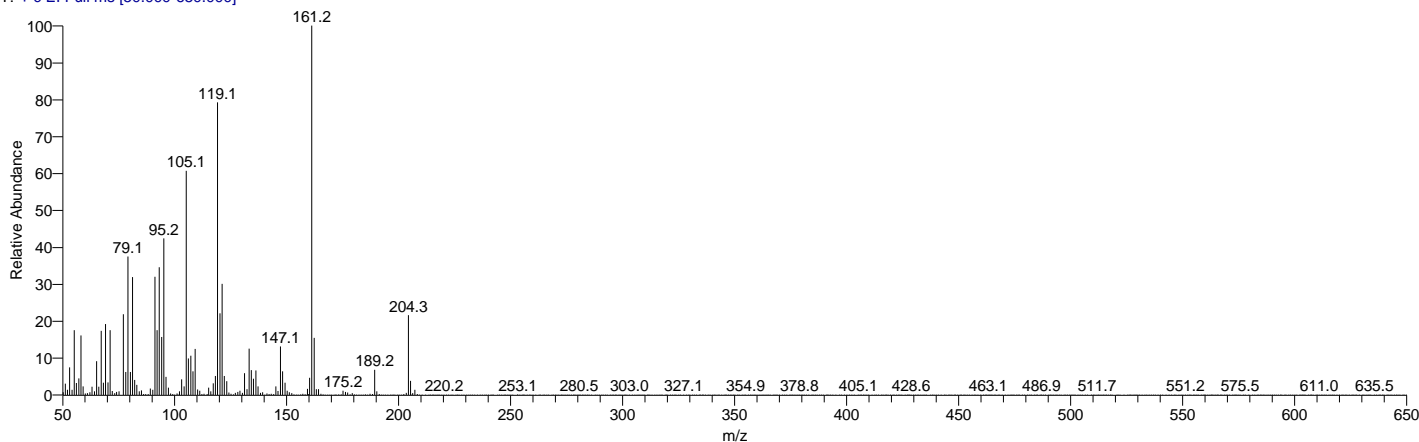

| RT    | Compound Name                                                                                      | Area % | Molecular Formula | Molecular Weight | Cas #      | MF  | Library         |
|-------|----------------------------------------------------------------------------------------------------|--------|-------------------|------------------|------------|-----|-----------------|
| 22.90 | 1-Naphthalenol, 1,2,3,4,4a,7,8,8a-octahydro-1,6-dimethyl-4-(1-methylethyl)-, [1R-(1à,4á,4aá,8aá)]- | 0.28   | C15H26O           | 222              | 19435-97-3 | 926 | mainlib         |
| 22.90 | 1-NAPHTHALENOL, 1,2,3,4,4A,7,8,8A-OCTAHYDRO-1,6-DIMETHYL-4-(1-METHYLETHYL)-, [1R-(1à,4á,4Aá,8Aá)]- | 0.28   | C15H26O           | 222              | 19435-97-3 | 926 | WileyRegistry8e |
| 22.90 | 1-Naphthalenol, 1,2,3,4,4a,7,8,8a-octahydro-1,6-dimethyl-4-(1-methylethyl)-, [1R-(1à,4á,4aá,8aá)]- | 0.28   | C15H26O           | 222              | 19435-97-3 | 941 | replib          |

Compound Structure

Hit Spectrum

Formula C15H26O, MW 222, CAS# 19435-97-3, Entry# 150252  
(1R,4S,4aR,8aS)-4-Isopropyl-1,6-dimethyl-1,2,3,4,4a,7,8,8a-octahydronaphthalen-1-ol

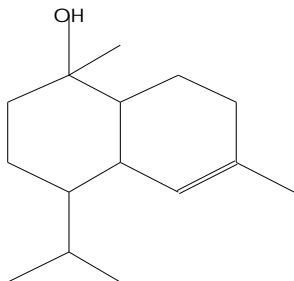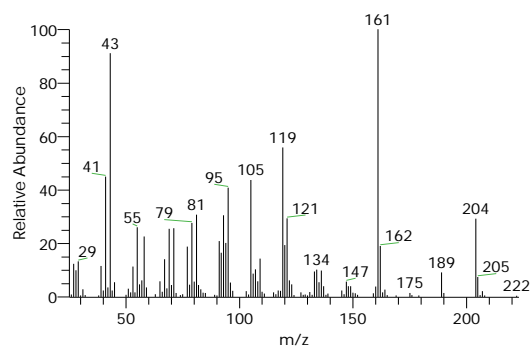

Formula C15H26O, MW 222, CAS# 19435-97-3, Entry# 109844  
4-ISOPROPYL-1,6-DIMETHYL-1,2,3,4,4A,7,8,8A-OCTAHYDRO-1-NAPHTHALENOL #

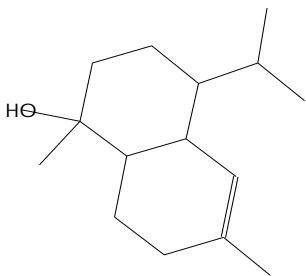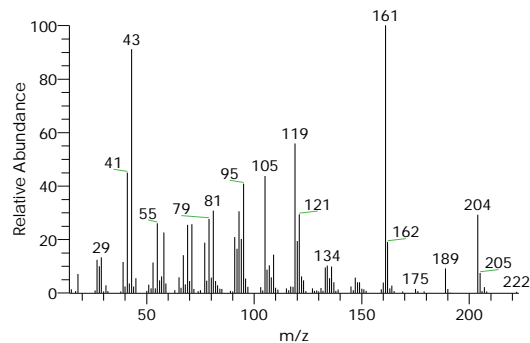

# My GC-MS Report

Compound Structure

Hit Spectrum

Formula C<sub>15</sub>H<sub>26</sub>O, MW 222, CAS# 19435-97-3, Entry# 24848  
(1R,4S,4aR,8aS)-4-Isopropyl-1,6-dimethyl-1,2,3,4,4a,7,8,8a-octahydronaphthalen-1-ol

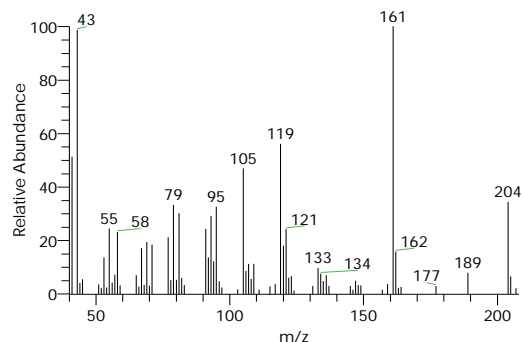

gerfa\_acetone #5678 RT: 23.04 AV: 1 NL: 6.19E7  
T: + c EI Full ms [50.000-650.000]

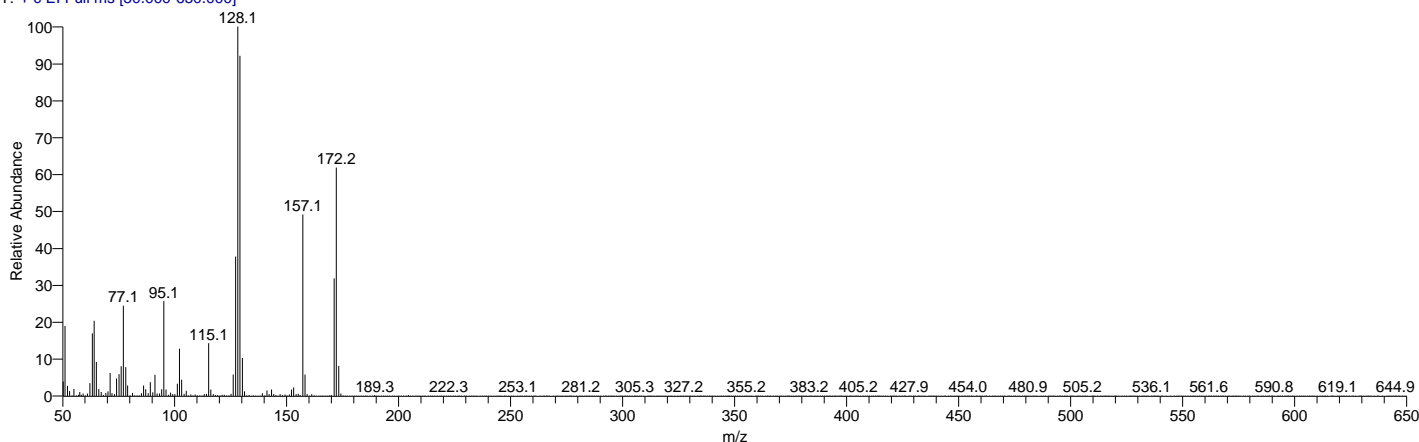

| RT    | Compound Name                                                                   | Area % | Molecular Formula                              | Molecular Weight | Cas #      | MF  | Library         |
|-------|---------------------------------------------------------------------------------|--------|------------------------------------------------|------------------|------------|-----|-----------------|
| 23.04 | 6-Phenyl-3,5-hexadien-2-one                                                     | 3.15   | C <sub>12</sub> H <sub>12</sub> O              | 172              | 4173-4-8   | 927 | mainlib         |
| 23.04 | 1(4H)-NAPHTHALENONE, 4,4-DIMETHYL-                                              | 3.15   | C <sub>12</sub> H <sub>12</sub> O              | 172              | 16020-16-9 | 958 | WileyRegistry8e |
| 23.04 | (3'E,2R,2'RS)-2-T-BUTYL-6-[2'-HYDROXY-4'-PHENYL-3'-BUTENYL]-4H-1,3-DIOXIN-4-ONE | 3.15   | C <sub>18</sub> H <sub>22</sub> O <sub>4</sub> | 302              | NA         | 897 | WileyRegistry8e |

Compound Structure

Hit Spectrum

6-Phenyl-3,5-hexadien-2-one  
Formula C<sub>12</sub>H<sub>12</sub>O, MW 172, CAS# 4173-44-8, Entry# 112566  
6-Phenylhexa-3,5-dien-2-one

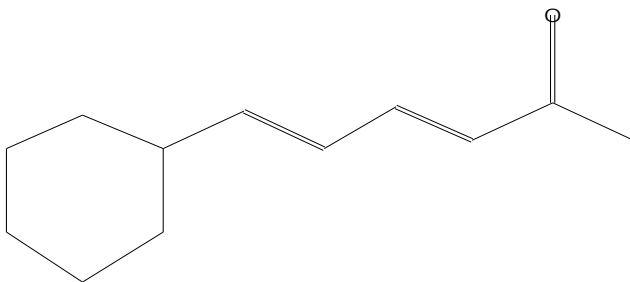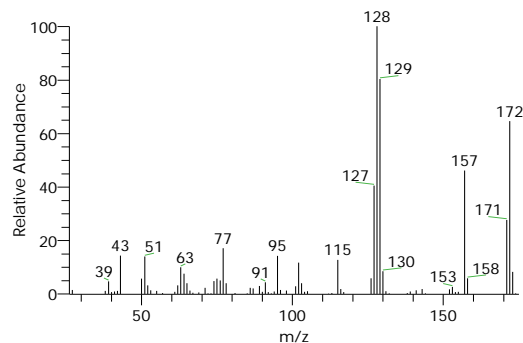

# My GC-MS Report

Compound Structure

Hit Spectrum

1(4H)-NAPHTHALENONE, 4,4-DIMETHYL-  
Formula C<sub>12</sub>H<sub>12</sub>O, MW 172, CAS# 16020-16-9, Entry# 55977  
4,4-DIMETHYLNAPHTHALEN-1(4H)-ONE

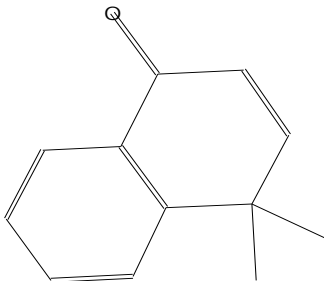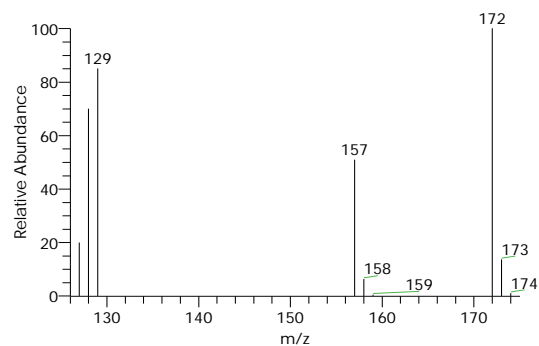

(3'E,2R,2'RS)-2-T-BUTYL-6-[2'-HYDROXY-4'-PHENYL-3'-BUTENYL]-4H-1,3-DIOXIN-4-ONE  
Formula C<sub>18</sub>H<sub>22</sub>O<sub>4</sub>, MW 302, CAS# NA, Entry# 191419

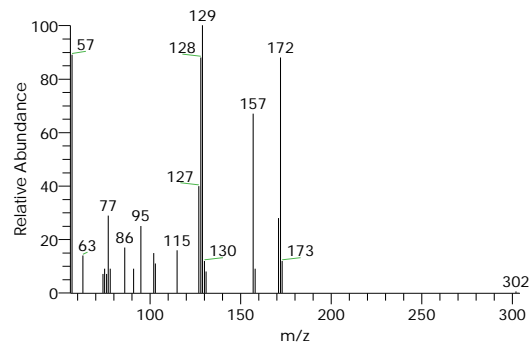

Supplement: s1 [file s1]
