# Supplementary material for: Phytochemical Characterization and Chemotherapeutic Potential of Cinnamomum verum Extracts on the Multiplication of Protozoan Parasites In Vitro and In Vivo
Source: MDPI journal article supplement (doi:10.3390/molecules25040996), 2020-02-24

# My GC-MS Report

RT: 0.00 - 36.00 SM: 7B

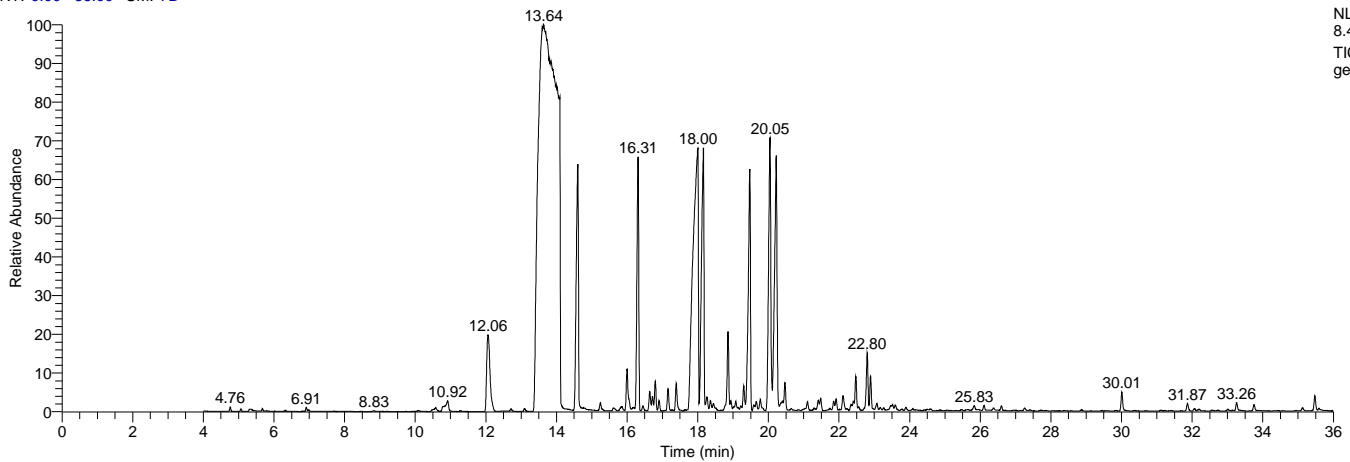

NL:  
8.47E8  
TIC MS  
gerfa\_EA

| RT    | Area % | Peak Area      |
|-------|--------|----------------|
| 10.92 | 0.24   | 128173820.51   |
| 12.06 | 1.94   | 1035114737.02  |
| 13.64 | 53.81  | 28642212603.14 |
| 14.60 | 4.27   | 2271905049.14  |
| 16.00 | 0.62   | 331863513.20   |
| 16.31 | 3.68   | 1956479496.62  |
| 16.64 | 0.24   | 127515039.35   |
| 16.72 | 0.16   | 84334567.09    |
| 16.80 | 0.35   | 188369875.93   |
| 16.90 | 0.11   | 57520312.66    |
| 17.16 | 0.28   | 146669995.78   |
| 17.39 | 0.38   | 200364399.84   |
| 18.00 | 9.92   | 5280783018.22  |
| 18.16 | 4.83   | 2570696982.40  |
| 18.26 | 0.11   | 59233142.90    |
| 18.86 | 1.05   | 557328644.63   |
| 19.30 | 0.26   | 137888084.26   |
| 19.47 | 4.14   | 2201097941.66  |
| 19.66 | 0.12   | 63533698.33    |
| 19.77 | 0.18   | 96526750.45    |
| 20.04 | 4.78   | 2545719837.35  |
| 20.22 | 4.91   | 2615571936.08  |
| 20.47 | 0.43   | 228816648.36   |
| 21.11 | 0.14   | 75018362.93    |
| 21.41 | 0.14   | 76347365.03    |
| 21.48 | 0.16   | 86057337.89    |
| 21.85 | 0.11   | 60872365.51    |
| 21.92 | 0.14   | 75870020.41    |
| 22.12 | 0.22   | 118894434.31   |
| 22.48 | 0.53   | 283703031.75   |
| 22.80 | 0.77   | 411968559.79   |
| 22.89 | 0.37   | 199251685.20   |
| 30.01 | 0.25   | 135159887.79   |
| 33.26 | 0.12   | 64939646.82    |
| 35.47 | 0.21   | 109604833.07   |

# My GC-MS Report

gerfa\_EA #2064 RT: 10.92 AV: 1 NL: 8.04E6  
T: + c EI Full ms [50.000-650.000]

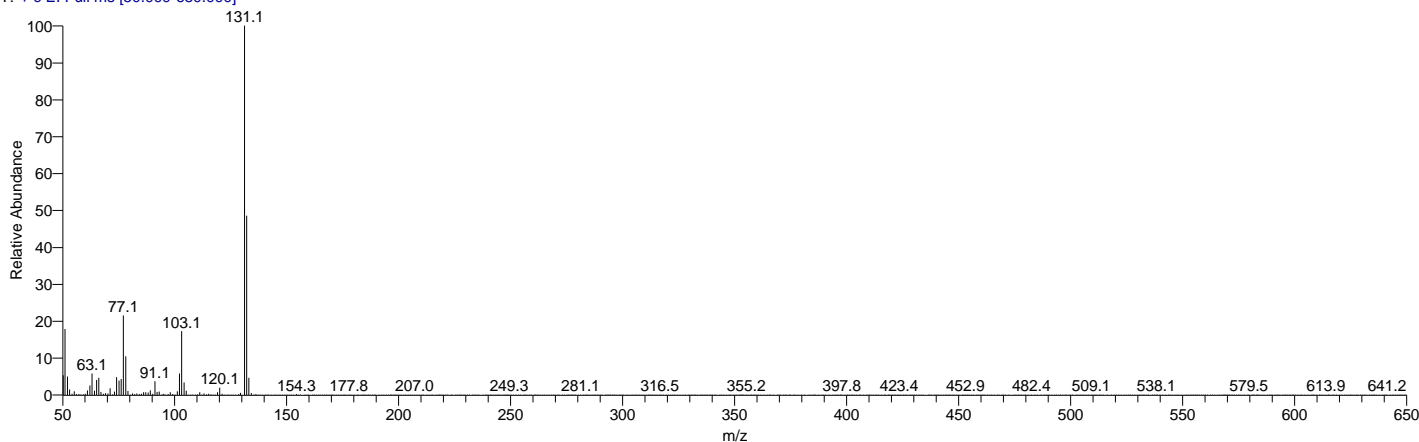

| RT    | Compound Name         | Area % | Molecular Formula | Molecular Weight | Cas #     | MF  | Library         |
|-------|-----------------------|--------|-------------------|------------------|-----------|-----|-----------------|
| 10.92 | Benzofuran, 2-methyl- | 0.24   | C9H8O             | 132              | 4265-25-2 | 901 | mainlib         |
| 10.92 | Benzofuran, 2-methyl- | 0.24   | C9H8O             | 132              | 4265-25-2 | 905 | replib          |
| 10.92 | BENZOFURAN, 2-METHYL- | 0.24   | C9H8O             | 132              | 4265-25-2 | 905 | WileyRegistry8e |

Compound Structure

Hit Spectrum

Benzofuran, 2-methyl-  
Formula C9H8O, MW 132, CAS# 4265-25-2, Entry# 115872  
2-Methylbenzofuran

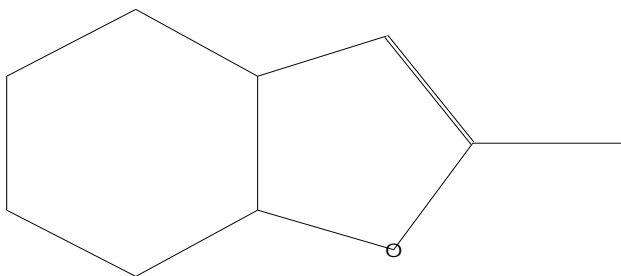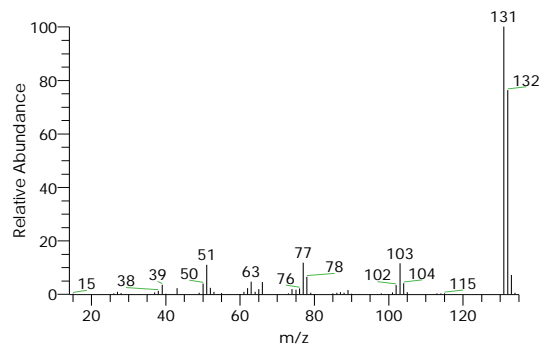

Benzofuran, 2-methyl-  
Formula C9H8O, MW 132, CAS# 4265-25-2, Entry# 20943  
2-Methylbenzofuran

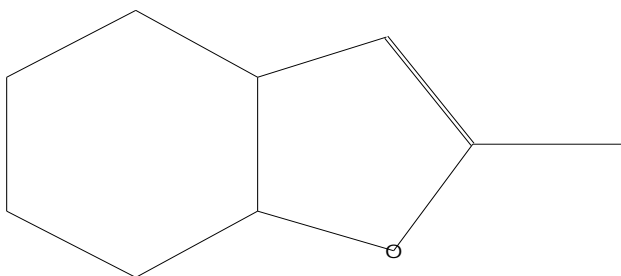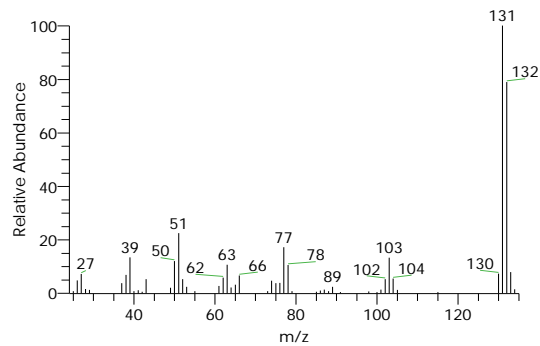

BENZOFURAN, 2-METHYL-  
Formula C9H8O, MW 132, CAS# 4265-25-2, Entry# 20576  
2-METHYLBENZOFURAN

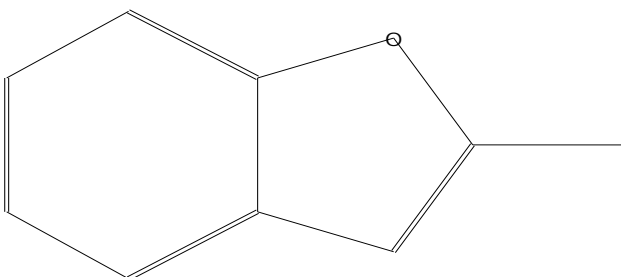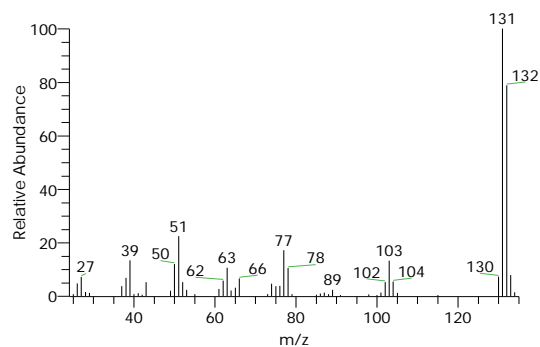

# My GC-MS Report

gerfa\_EA #2405 RT: 12.06 AV: 1 NL: 4.21E7  
T: + c EI Full ms [50.000-650.000]

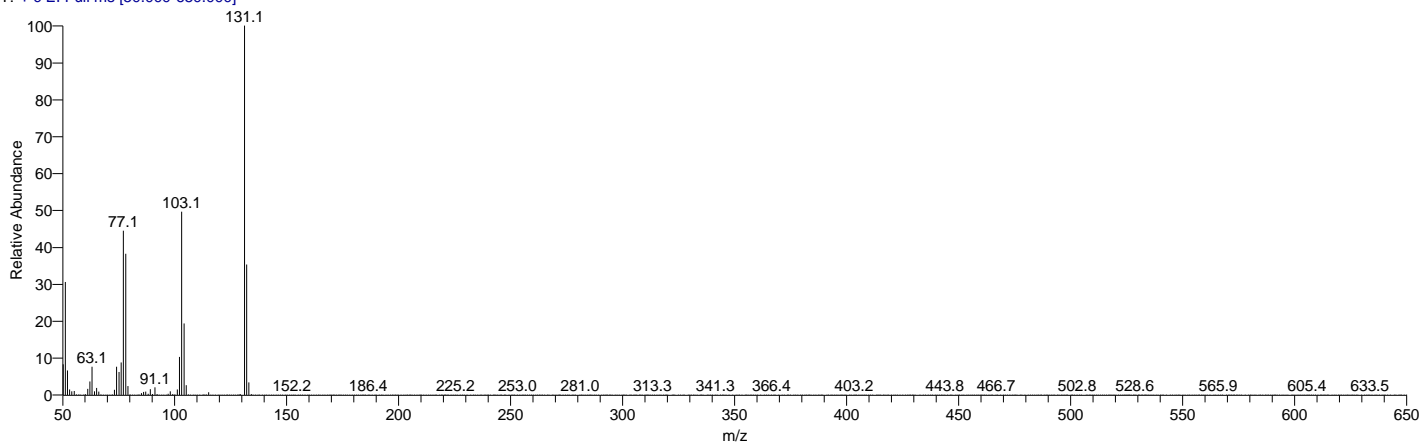

| RT    | Compound Name             | Area % | Molecular Formula | Molecular Weight | Cas #      | MF  | Library |
|-------|---------------------------|--------|-------------------|------------------|------------|-----|---------|
| 12.06 | (Z)-3-Phenylacrylaldehyde | 1.94   | C9H8O             | 132              | 57194-69-1 | 960 | mainlib |
| 12.06 | 2-Propenal, 3-phenyl-     | 1.94   | C9H8O             | 132              | 104-55-2   | 949 | replib  |
| 12.06 | Cinnamaldehyde, (E)-      | 1.94   | C9H8O             | 132              | 14371-10-9 | 949 | mainlib |

## Compound Structure

## Hit Spectrum

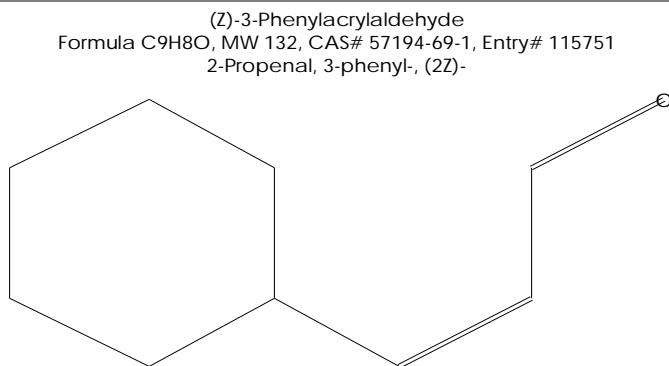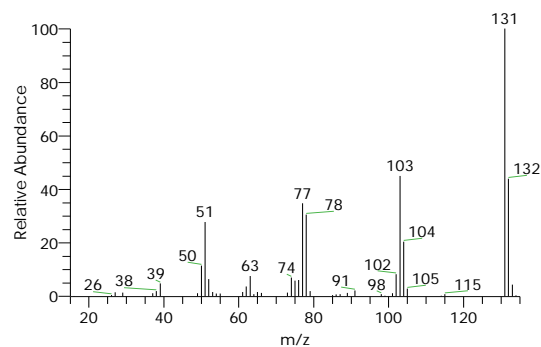

2-Propenal, 3-phenyl-  
Formula C9H8O, MW 132, CAS# 104-55-2, Entry# 20950

Cinnamaldehyde

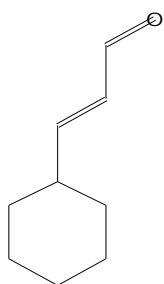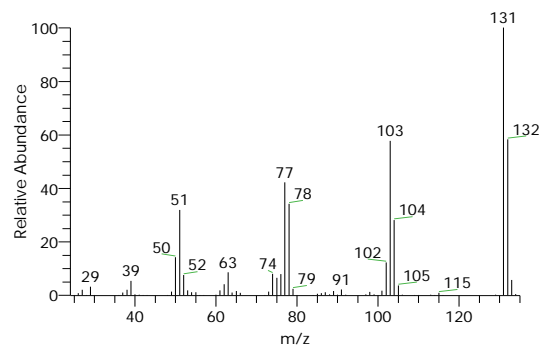

Cinnamaldehyde, (E)-  
Formula C9H8O, MW 132, CAS# 14371-10-9, Entry# 115750

(E)-Cinnamaldehyde

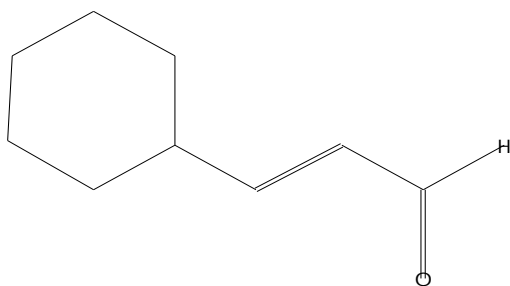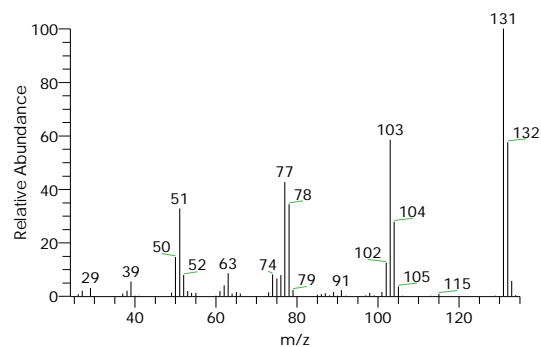

# My GC-MS Report

gerfa\_EA #2875 RT: 13.64 AV: 1 NL: 2.16E8  
T: + c EI Full ms [50.000-650.000]

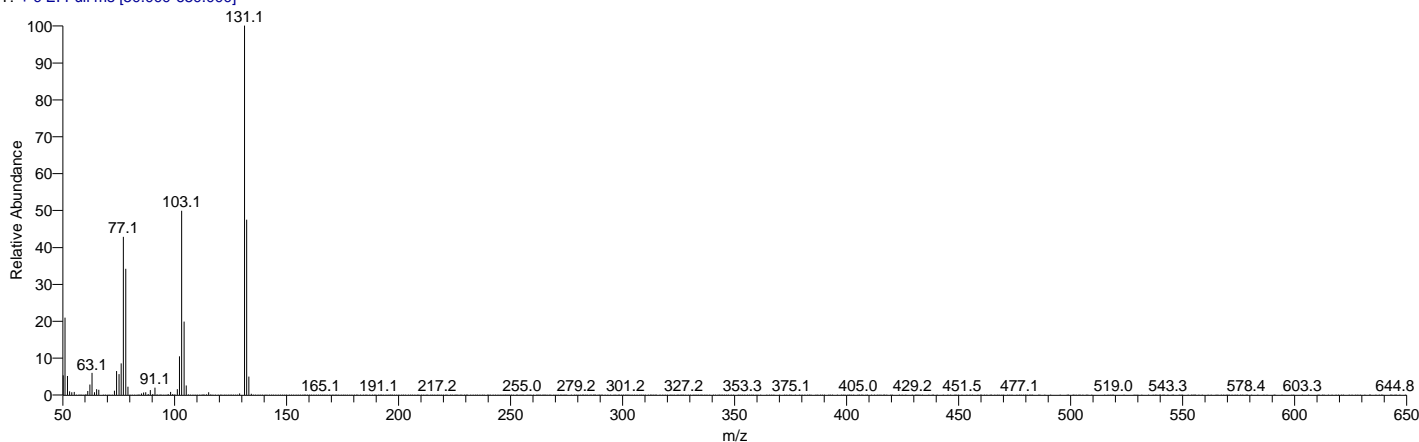

| RT    | Compound Name             | Area % | Molecular Formula | Molecular Weight | Cas #      | MF  | Library |
|-------|---------------------------|--------|-------------------|------------------|------------|-----|---------|
| 13.64 | (Z)-3-Phenylacrylaldehyde | 53.81  | C9H8O             | 132              | 57194-69-1 | 959 | mainlib |
| 13.64 | 2-Propenal, 3-phenyl-     | 53.81  | C9H8O             | 132              | 104-55-2   | 943 | replib  |
| 13.64 | Cinnamaldehyde, (E)-      | 53.81  | C9H8O             | 132              | 14371-10-9 | 943 | mainlib |

## Compound Structure

## Hit Spectrum

(Z)-3-Phenylacrylaldehyde  
Formula C9H8O, MW 132, CAS# 57194-69-1, Entry# 115751  
2-Propenal, 3-phenyl-, (Z)-

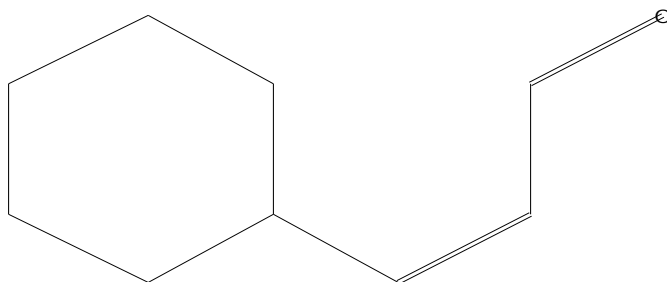

2-Propenal, 3-phenyl-  
Formula C9H8O, MW 132, CAS# 104-55-2, Entry# 20950  
Cinnamaldehyde

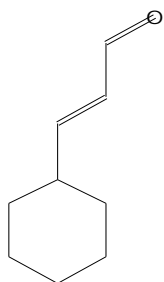

Cinnamaldehyde, (E)-  
Formula C9H8O, MW 132, CAS# 14371-10-9, Entry# 115750  
(E)-Cinnamaldehyde

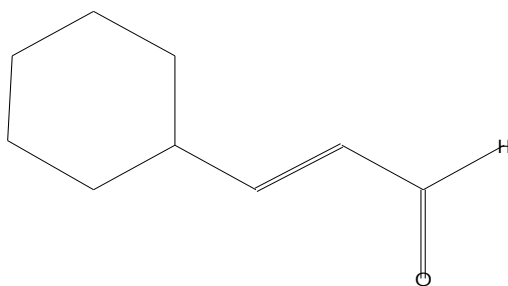

# My GC-MS Report

gerfa\_EA #3162 RT: 14.60 AV: 1 NL: 6.98E7  
T: + c EI Full ms [50.000-650.000]

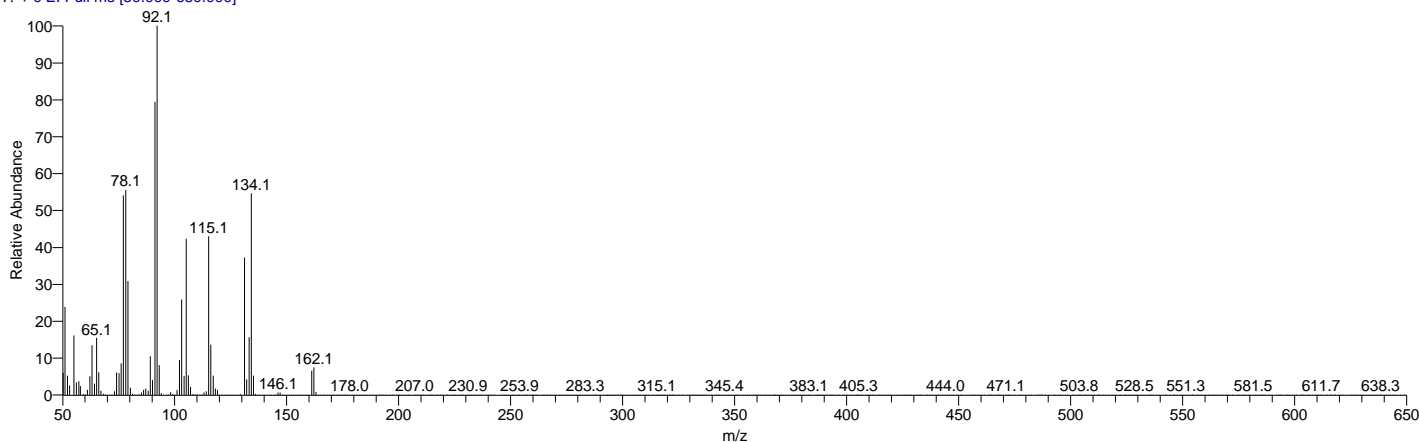

| RT    | Compound Name                  | Area % | Molecular Formula | Molecular Weight | Cas #     | MF  | Library |
|-------|--------------------------------|--------|-------------------|------------------|-----------|-----|---------|
| 14.60 | 2-Propen-1-ol, 3-phenyl-, (E)- | 4.27   | C9H10O            | 134              | 4407-36-7 | 926 | mainlib |
| 14.60 | 2-Propen-1-ol, 3-phenyl-       | 4.27   | C9H10O            | 134              | 104-54-1  | 914 | mainlib |
| 14.60 | 2-Propen-1-ol, 3-phenyl-       | 4.27   | C9H10O            | 134              | 104-54-1  | 908 | replib  |

Compound Structure

Hit Spectrum

2-Propen-1-ol, 3-phenyl-, (E)-  
Formula C9H10O, MW 134, CAS# 4407-36-7, Entry# 65164  
\$:28OOCDEMITAIZTP-QPJXVBHSA-N

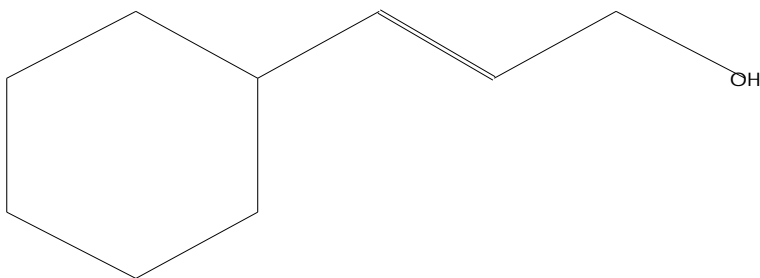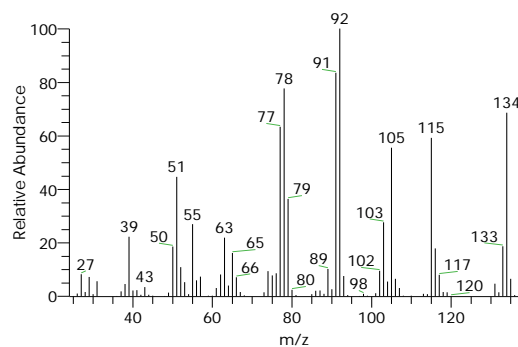

2-Propen-1-ol, 3-phenyl-  
Formula C9H10O, MW 134, CAS# 104-54-1, Entry# 65165  
Cinnamyl alcohol

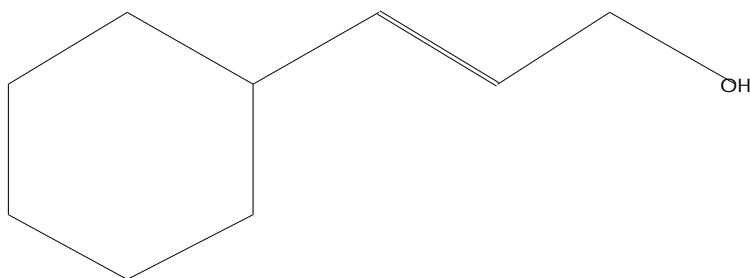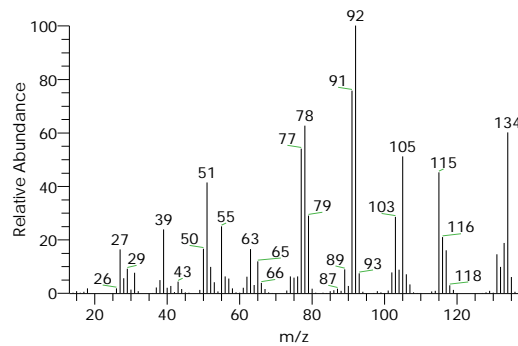

2-Propen-1-ol, 3-phenyl-  
Formula C9H10O, MW 134, CAS# 104-54-1, Entry# 13932  
Cinnamyl alcohol

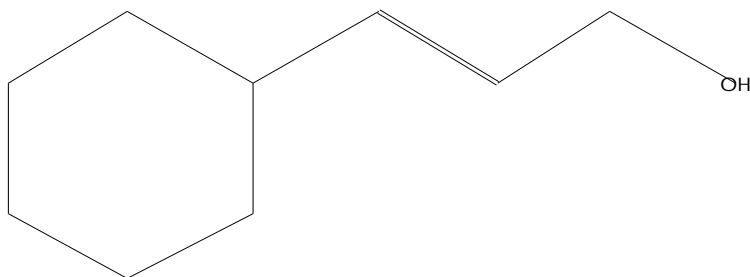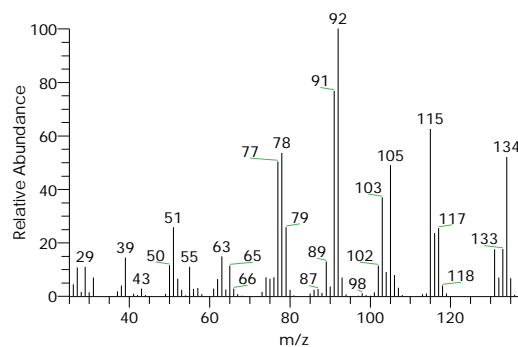

# My GC-MS Report

gerfa\_EA #3579 RT: 16.00 AV: 1 NL: 8.57E6  
T: + c EI Full ms [50.000-650.000]

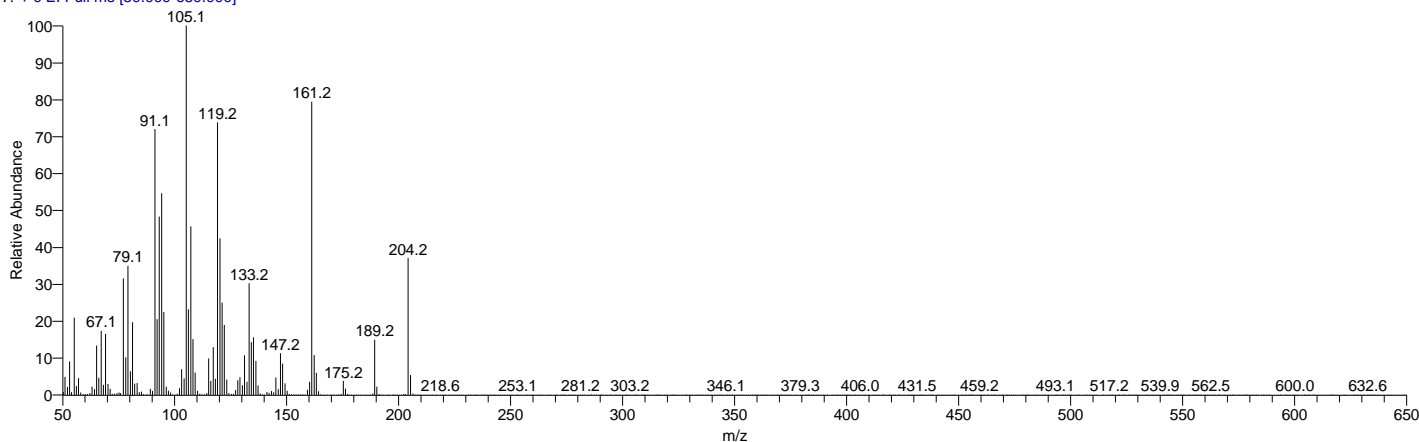

| RT    | Compound Name                                                                                        | Area % | Molecular Formula | Molecular Weight | Cas #      | MF  | Library         |
|-------|------------------------------------------------------------------------------------------------------|--------|-------------------|------------------|------------|-----|-----------------|
| 16.00 | 1,2,4-Metheno-1H-indene, octahydro-1,7a-dimethyl-5-(1-methylethyl)-, [1S-(1à,2à,3aà,4à,5à,7aà,8S*)]- | 0.62   | C15H24            | 204              | 22469-52-9 | 935 | replib          |
| 16.00 | (+)-CYCLOISOSATIVENE                                                                                 | 0.62   | C15H24            | 204              | NA         | 915 | WileyRegistry8e |
| 16.00 | 1,2,4-Metheno-1H-indene, octahydro-1,7a-dimethyl-5-(1-methylethyl)-, [1S-(1à,2à,3aà,4à,5à,7aà,8S*)]- | 0.62   | C15H24            | 204              | 22469-52-9 | 911 | replib          |

Compound Structure

Hit Spectrum

Formula C15H24, MW 204, CAS# 22469-52-9, Entry# 16426  
(+)-Cyclosativene

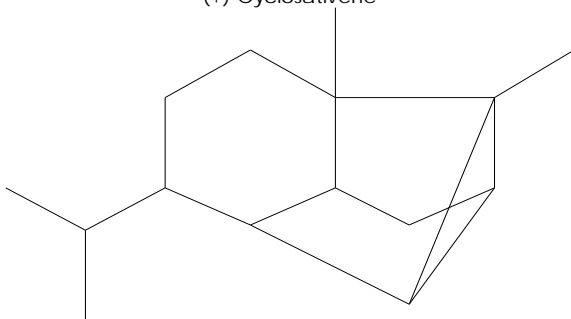

(+)-CYCLOISOSATIVENE

Formula C15H24, MW 204, CAS# NA, Entry# 89651

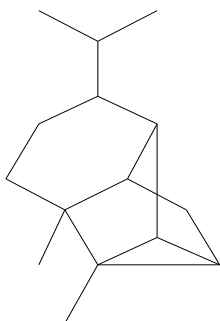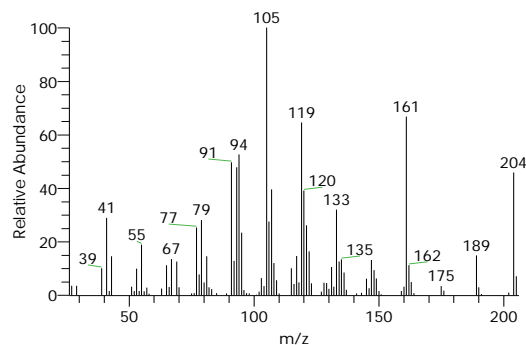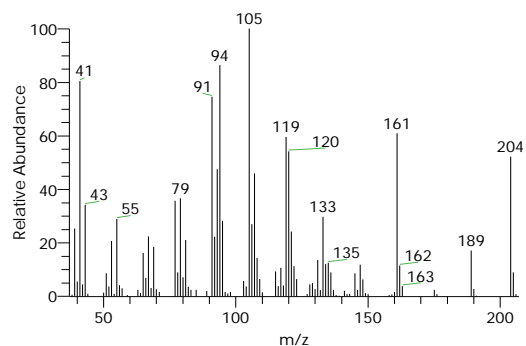

# My GC-MS Report

Compound Structure

Hit Spectrum

Formula C<sub>15</sub>H<sub>24</sub>, MW 204, CAS# 22469-52-9, Entry# 16246

(+)-Cyclosativene

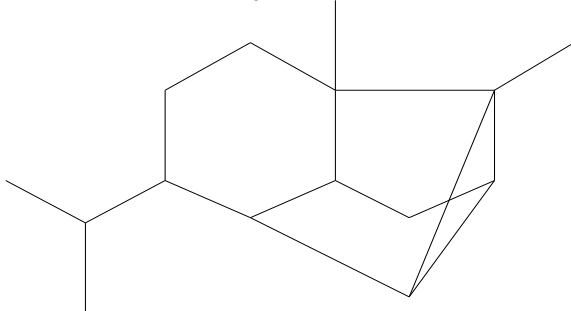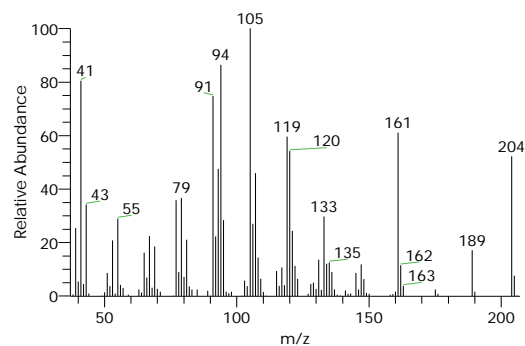

gerfa\_EA #3671 RT: 16.31 AV: 1 NL: 7.59E7

T: + c EI Full ms [50.000-650.000]

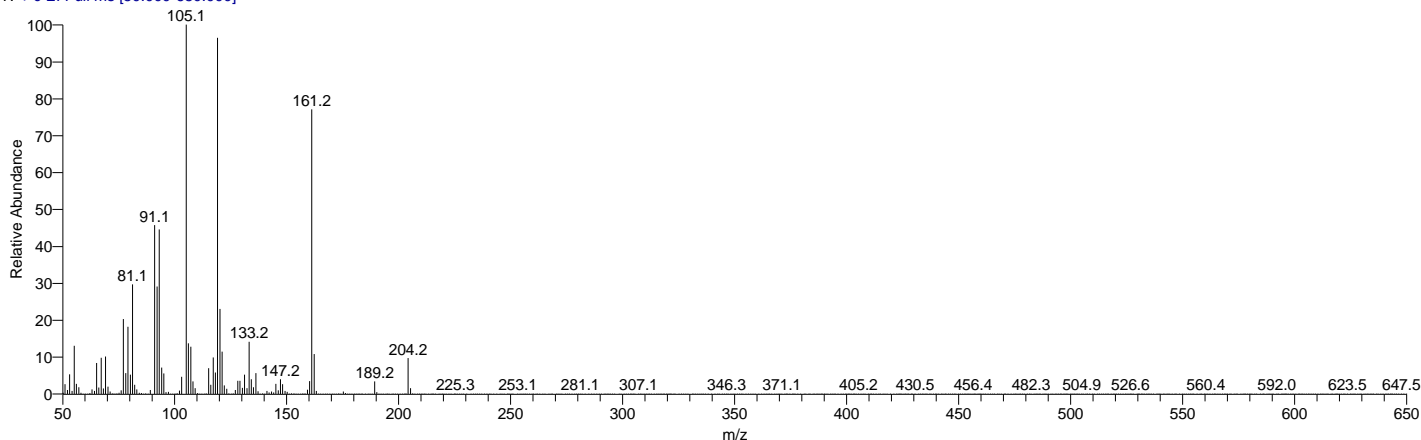

| RT    | Compound Name                                                        | Area % | Molecular Formula               | Molecular Weight | Cas #      | MF  | Library   |
|-------|----------------------------------------------------------------------|--------|---------------------------------|------------------|------------|-----|-----------|
| 16.31 | TRICYCLO[4.4.0.0(2,7)]DEC-3-ENE, 1,3-DIMETHYL-8-(1-METHYLETHYL)-, ST | 3.68   | C <sub>15</sub> H <sub>24</sub> | 204              | 3856-2 5-5 | 951 | WileyRegi |
| 16.31 | .alfa.-Copaene                                                       | 3.68   | C <sub>15</sub> H <sub>24</sub> | 204              | NA         | 930 | mainlib   |
| 16.31 | TRICYCLO[4.4.0.0(2,7)]DEC-3-ENE, 1,3-DIMETHYL-8-(1-METHYLETHYL)-, ST | 3.68   | C <sub>15</sub> H <sub>24</sub> | 204              | 3856-2 5-5 | 952 | WileyRegi |

Compound Structure

Hit Spectrum

TRICYCLO[4.4.0.0(2,7)]DEC-3-ENE, 1,3-DIMETHYL-8-(1-METHYLETHYL)-, ST

Formula C<sub>15</sub>H<sub>24</sub>, MW 204, CAS# 3856-25-5, Entry# 89462

TRICYCLO[4.4.0.0(2,7)]DEC-3-ENE, 1,3-DIMETHYL-8-(1-METHYLETHYL)-, STEREOISOMER

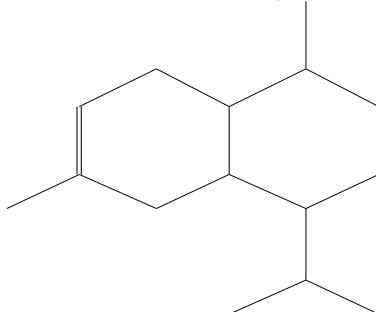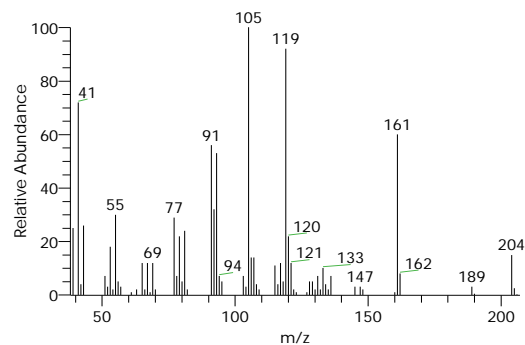

# My GC-MS Report

Compound Structure

Hit Spectrum

.alpha.-Copaene  
Formula C<sub>15</sub>H<sub>24</sub>, MW 204, CAS# NA, Entry# 150578  
\$:28VLXDPFLIRFYIME-UHFFFAOYSA-N

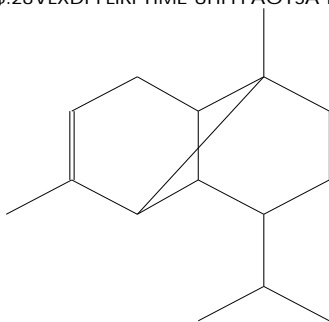

SI 928, RSI 930, mainlib, Entry# 150578, CAS# NA, .alpha.-Copaene

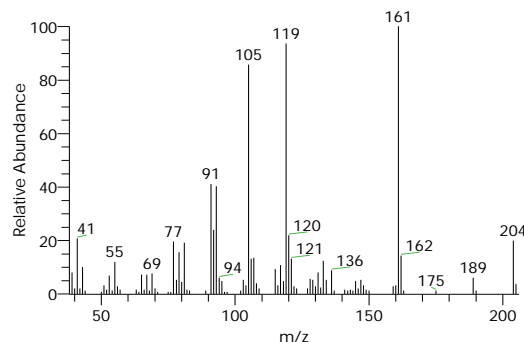

TRICYCLO[4.4.0.0(2,7)]DEC-3-ENE, 1,3-DIMETHYL-8-(1-METHYLETHYL)-, ST  
Formula C<sub>15</sub>H<sub>24</sub>, MW 204, CAS# 3856-25-5, Entry# 89463  
TRICYCLO[4.4.0.0(2,7)]DEC-3-ENE, 1,3-DIMETHYL-8-(1-METHYLETHYL)-, STEREOISOMER

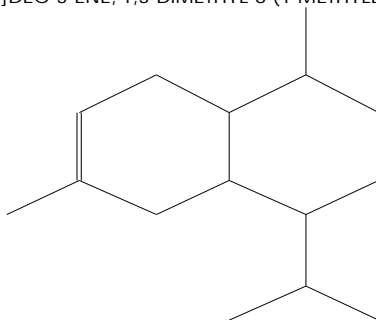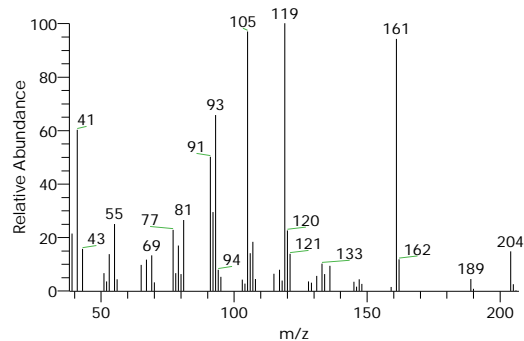

gerfa\_EA #3770 RT: 16.64 AV: 1 NL: 4.70E6  
T: + c EI Full ms [50.000-650.000]

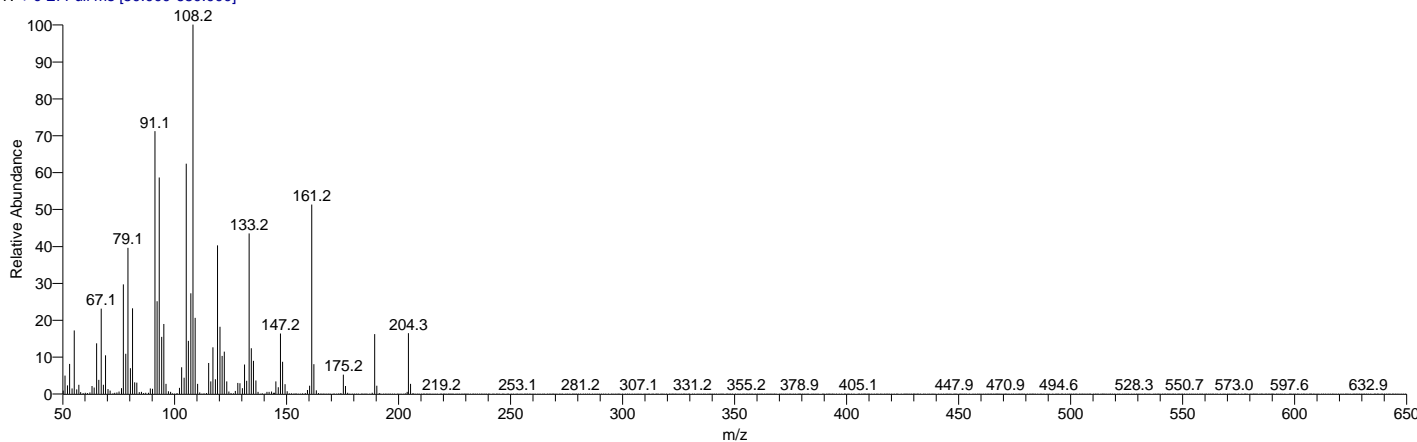

| RT    | Compound Name                                                                                      | Area % | Molecular Formula               | Molecular Weight | Cas #     | MF  | Library         |
|-------|----------------------------------------------------------------------------------------------------|--------|---------------------------------|------------------|-----------|-----|-----------------|
| 16.64 | 1,4-Methano-1H-indene, octahydro-4-methyl-8-methylene-7-(1-methylethyl)-, [1S-(1à,3aá,4à,7à,7aá)]- | 0.24   | C <sub>15</sub> H <sub>24</sub> | 204              | 3650-28-0 | 915 | mainlib         |
| 16.64 | (+)-SATIVEN                                                                                        | 0.24   | C <sub>15</sub> H <sub>24</sub> | 204              | 3650-28-0 | 915 | WileyRegistry8e |
| 16.64 | 1,4-METHANO-1H-INDENE, OCTAHYDRO-4-METHYL-8-METHYLENE-7-(1-METHYLETHYL)-, [1S-(1à,3Aá,4à,7à,7Aá)]- | 0.24   | C <sub>15</sub> H <sub>24</sub> | 204              | 3650-28-0 | 915 | WileyRegistry8e |



# My GC-MS Report

Compound Structure

Hit Spectrum

Formula C<sub>15</sub>H<sub>24</sub>, MW 204, CAS# 3650-28-0, Entry# 84625  
(+)-Sativen

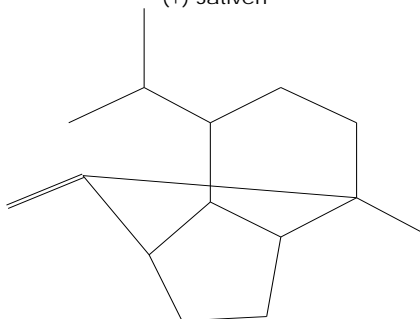

(+)-SATIVEN

Formula C<sub>15</sub>H<sub>24</sub>, MW 204, CAS# 3650-28-0, Entry# 392536

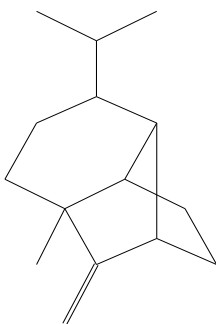

(+)-SATIVEN

Formula C<sub>15</sub>H<sub>24</sub>, MW 204, CAS# 3650-28-0, Entry# 89185

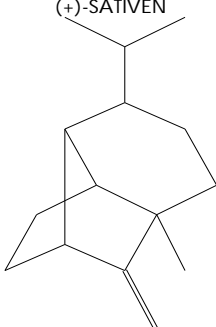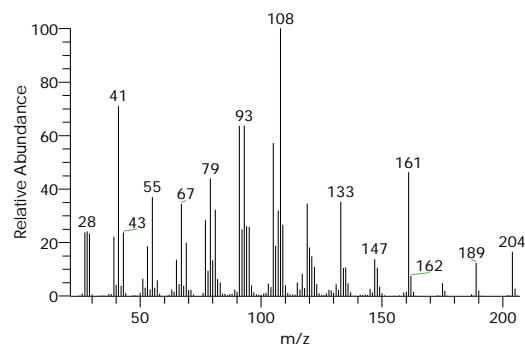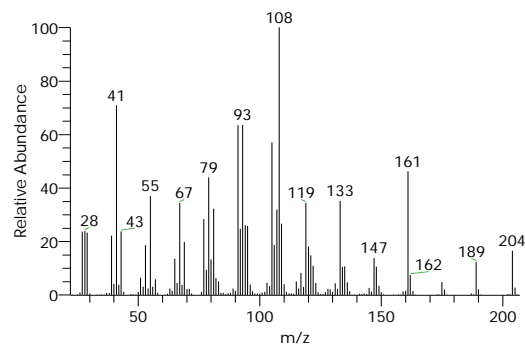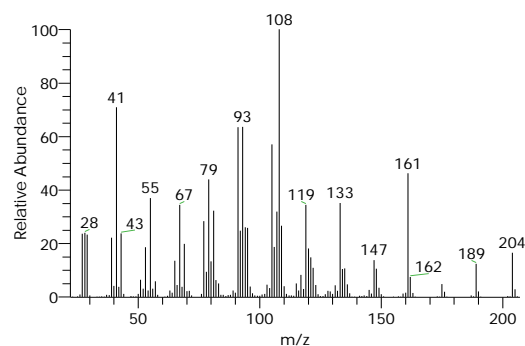

gerfa\_EA #3793 RT: 16.72 AV: 1 NL: 2.71E6  
T: + c EI Full ms [50.000-650.000]

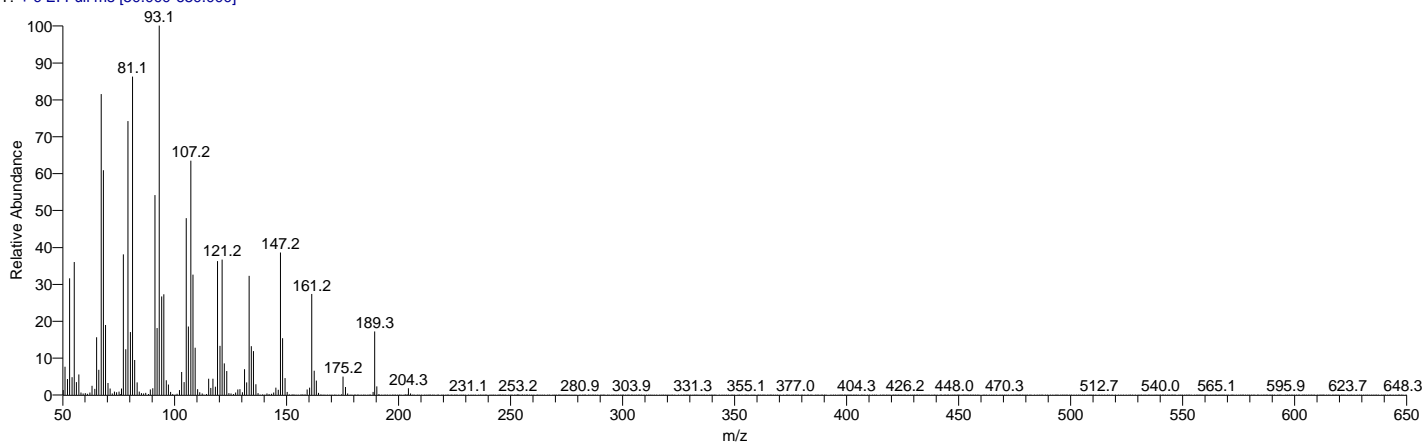

| RT    | Compound Name                                                               | Area % | Molecular Formula               | Molecular Weight | Cas #    | MF  | Library         |
|-------|-----------------------------------------------------------------------------|--------|---------------------------------|------------------|----------|-----|-----------------|
| 16.72 | CYCLOHEXANE, 1-ETHENYL-1-METHYL-2,4-BIS(1-METHYLETHENYL)-, [1S-(1à,2á,4á)]- | 0.16   | C <sub>15</sub> H <sub>24</sub> | 204              | 515-13-9 | 949 | WileyRegistry8e |

# My GC-MS Report

| RT    | Compound Name                                                               | Area % | Molecular Formula | Molecular Weight | Cas #    | MF  | Library         |
|-------|-----------------------------------------------------------------------------|--------|-------------------|------------------|----------|-----|-----------------|
| 16.72 | CYCLOHEXANE, 1-ETHENYL-1-METHYL-2,4-BIS(1-METHYLETHENYL)-, [1S-(1à,2á,4á)]- | 0.16   | C15H24            | 204              | 515-13-9 | 936 | WileyRegistry8e |
| 16.72 | Cyclohexane, 1-ethenyl-1-methyl-2,4-bis(1-methylethenyl)-, [1S-(1à,2á,4á)]- | 0.16   | C15H24            | 204              | 515-13-9 | 914 | replib          |

Compound Structure

Hit Spectrum

CYCLOHEXANE, 1-ETHENYL-1-METHYL-2,4-BIS(1-METHYLETHENYL)-, [1S-(1à,2á,4á)]-  
Formula C15H24, MW 204, CAS# 515-13-9, Entry# 89511  
2,4-DIISOPROPENYL-1-METHYL-1-VINYLCYCLOHEXANE #

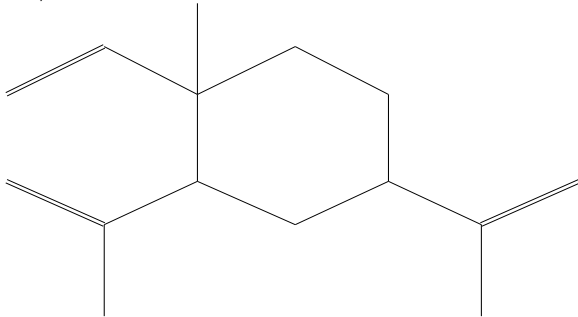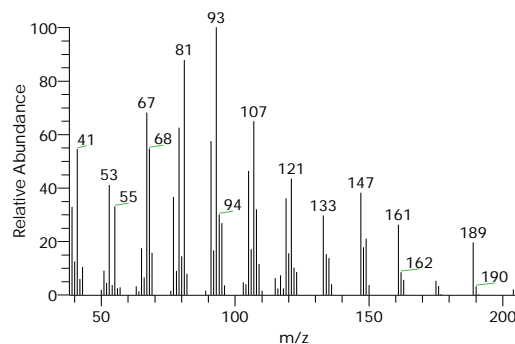

CYCLOHEXANE, 1-ETHENYL-1-METHYL-2,4-BIS(1-METHYLETHENYL)-, [1S-(1à,2á,4á)]-  
Formula C15H24, MW 204, CAS# 515-13-9, Entry# 89566  
2,4-DIISOPROPENYL-1-METHYL-1-VINYLCYCLOHEXANE #

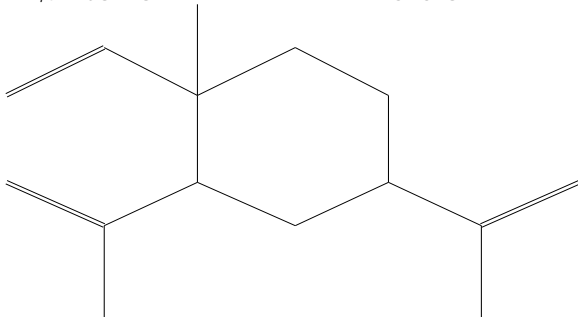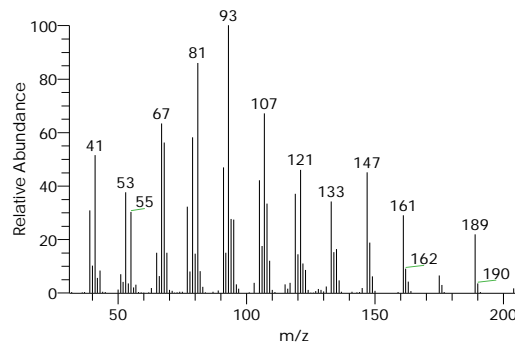

Cyclohexane, 1-ethenyl-1-methyl-2,4-bis(1-methylethenyl)-, [1S-(1à,2á,4á)]-  
Formula C15H24, MW 204, CAS# 515-13-9, Entry# 11582  
Cyclohexane, 2,4-diisopropenyl-1-methyl-1-vinyl-, (1S,2R,4R)- (-)-

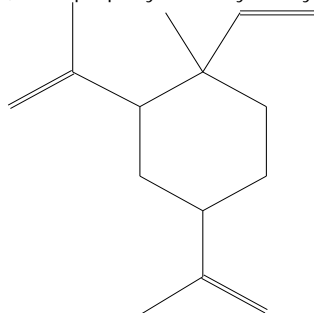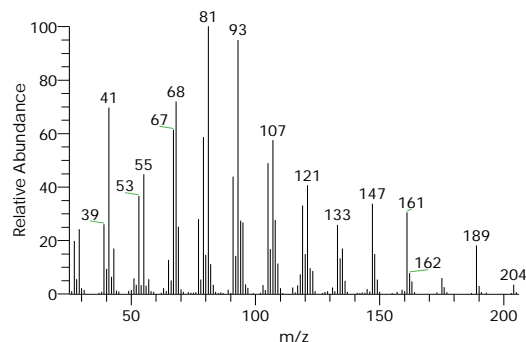

# My GC-MS Report

gerfa\_EA #3817 RT: 16.80 AV: 1 NL: 4.87E6  
T: + c EI Full ms [50.000-650.000]

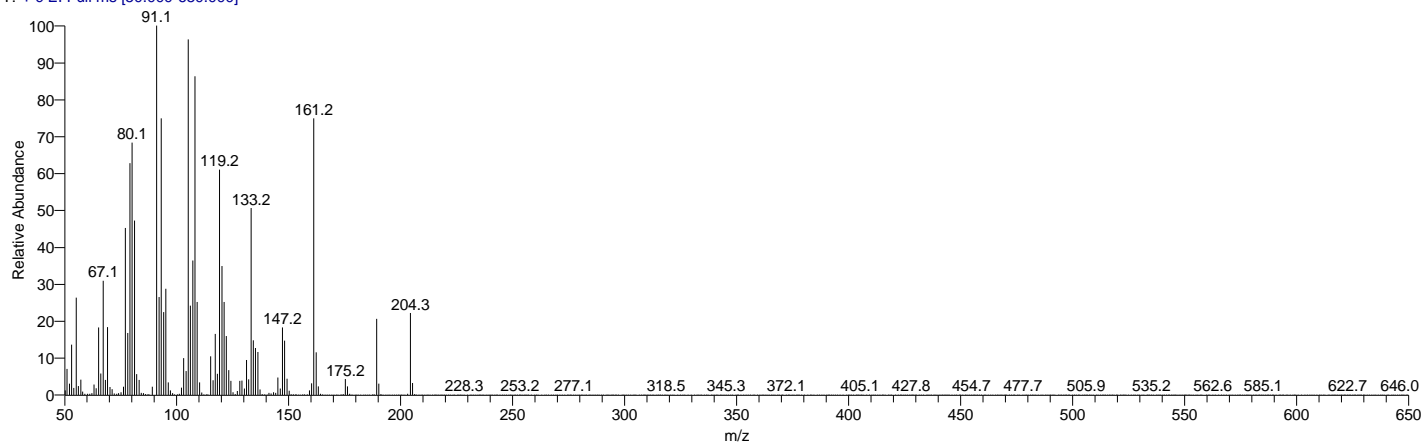

| RT                 | Compound Name                                                                                      | Area % | Molecular Formula | Molecular Weight | Cas #     | MF  | Library         |
|--------------------|----------------------------------------------------------------------------------------------------|--------|-------------------|------------------|-----------|-----|-----------------|
| 16.80              | 1,4-Methano-1H-indene, octahydro-4-methyl-8-methylene-7-(1-methylethyl)-, [1S-(1à,3aá,4à,7à,7aá)]- | 0.35   | C15H24            | 204              | 3650-28-0 | 908 | mainlib         |
| 16.80              | 1,4-METHANO-1H-INDENE, OCTAHYDRO-4-METHYL-8-METHYLENE-7-(1-METHYLETHYL)-, [1S-(1à,3Aá,4à,7à,7Aá)]- | 0.35   | C15H24            | 204              | 3650-28-0 | 908 | WileyRegistry8e |
| 16.80              | (+)-SATIVEN                                                                                        | 0.35   | C15H24            | 204              | 3650-28-0 | 908 | WileyRegistry8e |
| Compound Structure |                                                                                                    |        |                   |                  |           |     | Hit Spectrum    |

Formula C15H24, MW 204, CAS# 3650-28-0, Entry# 84625  
(+)-Sativen

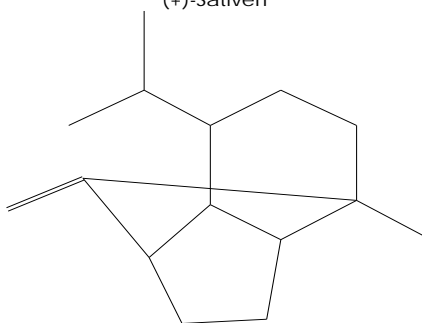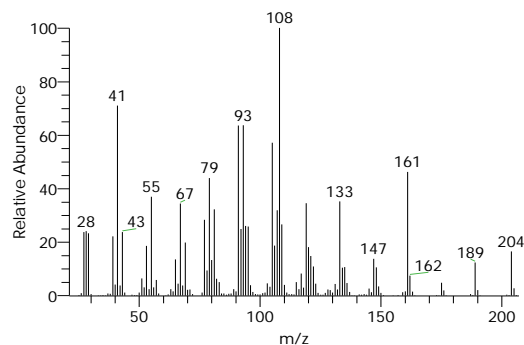

Formula C15H24, MW 204, CAS# 3650-28-0, Entry# 89185  
(+)-SATIVEN

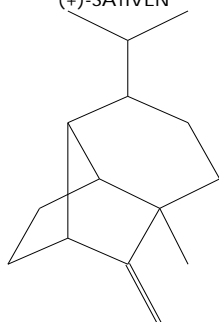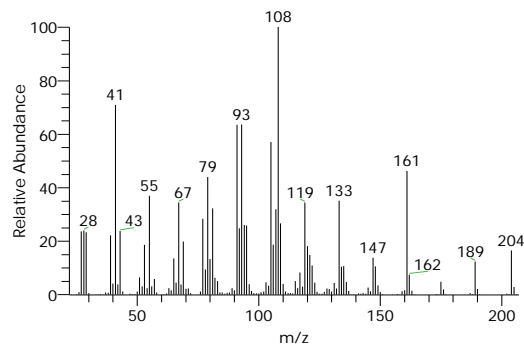

# My GC-MS Report

Compound Structure

Hit Spectrum

(+)-SATIVEN

Formula C<sub>15</sub>H<sub>24</sub>, MW 204, CAS# 3650-28-0, Entry# 392536

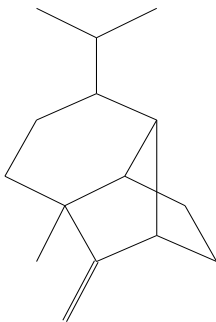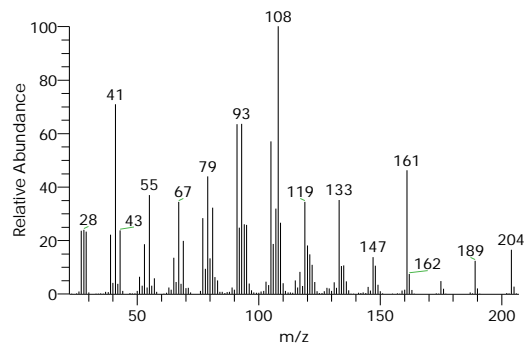

gerfa\_EA #3849 RT: 16.90 AV: 1 NL: 3.66E6  
T: + c EI Full ms [50.000-650.000]

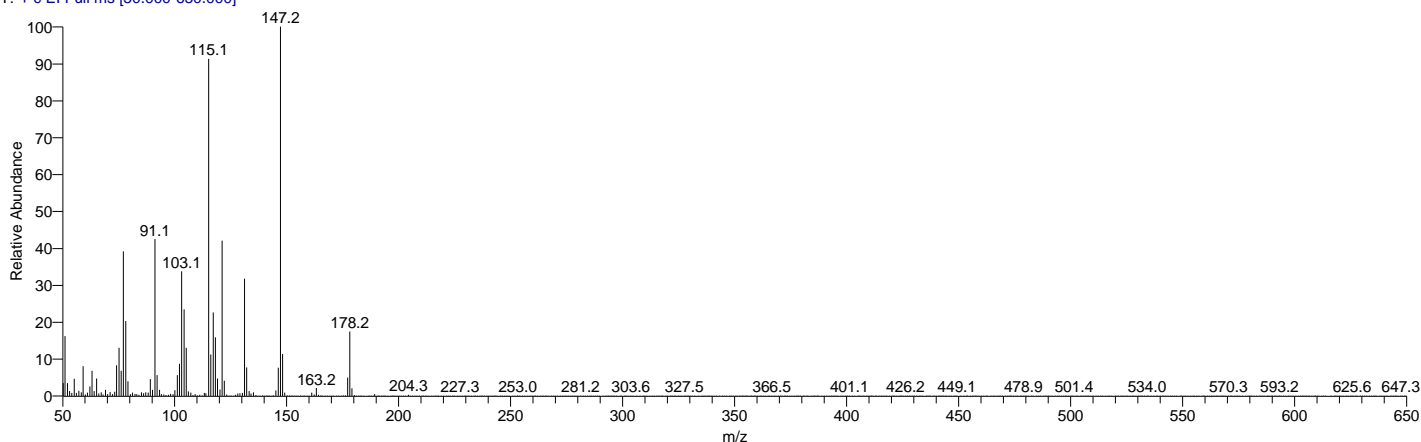

| RT    | Compound Name                            | Area % | Molecular Formula                              | Molecular Weight | Cas #    | MF  | Library             |
|-------|------------------------------------------|--------|------------------------------------------------|------------------|----------|-----|---------------------|
| 16.90 | CINNAMALDEHYDE DIMETHYL ACETAL           | 0.11   | C <sub>11</sub> H <sub>14</sub> O <sub>2</sub> | 178              | NA       | 921 | WileyRegi<br>stry8e |
| 16.90 | 9-Methoxybicyclo[6.1.0]nona-2,4,6-triene | 0.11   | C <sub>10</sub> H <sub>12</sub> O              | 148              | 826-14-2 | 774 | mainlib             |
| 16.90 | 9-METHOXYBICYCLO[6.1.0]NONA-2,4,6-TRIENE | 0.11   | C <sub>10</sub> H <sub>12</sub> O              | 148              | NA       | 774 | WileyRegi<br>stry8e |

Compound Structure

Hit Spectrum

CINNAMALDEHYDE DIMETHYL ACETAL

Formula C<sub>11</sub>H<sub>14</sub>O<sub>2</sub>, MW 178, CAS# NA, Entry# 60971

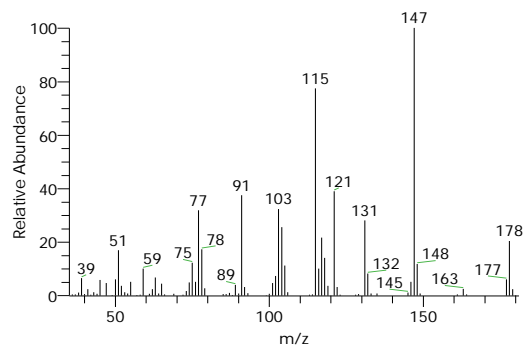

# My GC-MS Report

Compound Structure

Hit Spectrum

9-Methoxybicyclo[6.1.0]nona-2,4,6-triene  
Formula C<sub>10</sub>H<sub>12</sub>O, MW 148, CAS# 826-14-2, Entry# 94587  
Bicyclo[6.1.0]nona-2,4,6-trien-9-yl methyl ether #

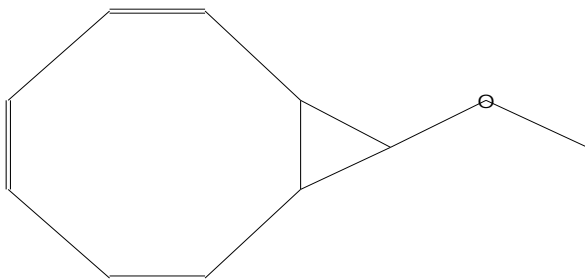

9-METHOXYBICYCLO[6.1.0]NONA-2,4,6-TRIENE  
Formula C<sub>10</sub>H<sub>12</sub>O, MW 148, CAS# NA, Entry# 370644  
9-METHOXY-BICYCLO[6.1.0]NONA-2,4,6-TRIENE

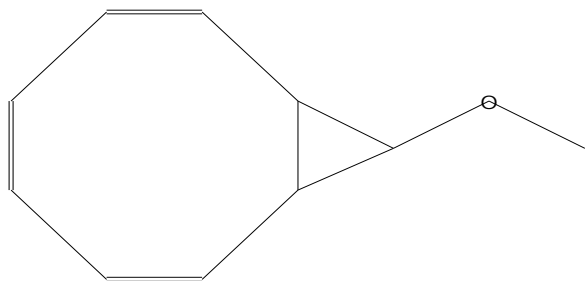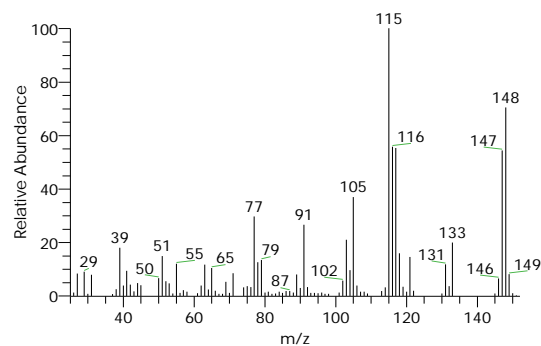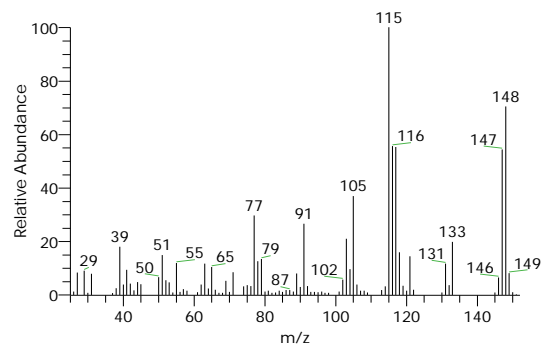

gerfa\_EA #3925 RT: 17.16 AV: 1 NL: 1.13E7  
T: + c EI Full ms [50.000-650.000]

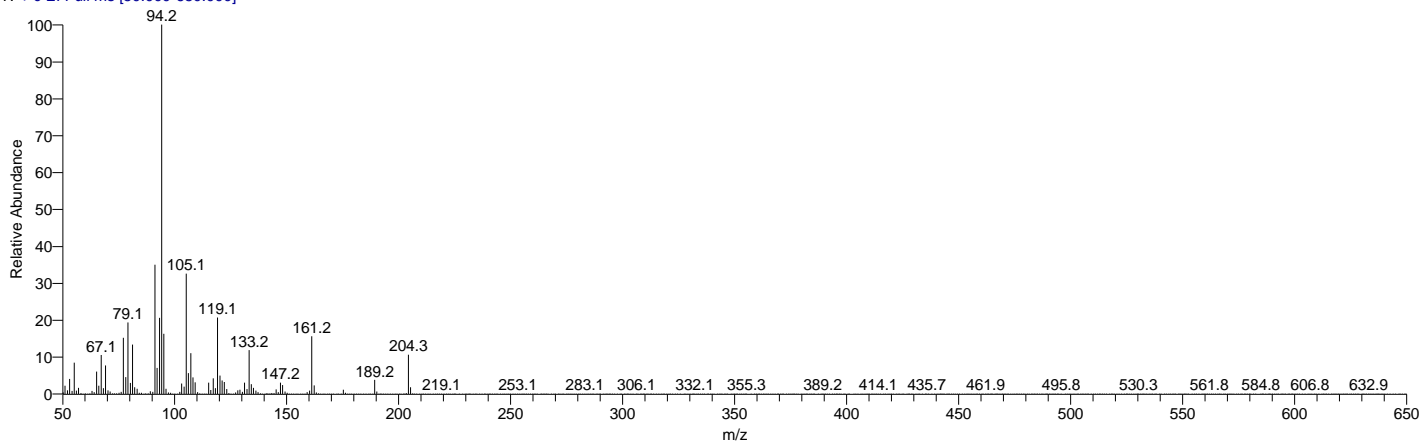

| RT    | Compound Name   | Area % | Molecular Formula               | Molecular Weight | Cas #      | MF  | Library         |
|-------|-----------------|--------|---------------------------------|------------------|------------|-----|-----------------|
| 17.16 | Isosativene     | 0.28   | C <sub>15</sub> H <sub>24</sub> | 204              | 24959-83-9 | 958 | replib          |
| 17.16 | (-)-ISOSATIVENE | 0.28   | C <sub>15</sub> H <sub>24</sub> | 204              | 24959-83-9 | 929 | WileyRegistry8e |
| 17.16 | Isosativene     | 0.28   | C <sub>15</sub> H <sub>24</sub> | 204              | 24959-83-9 | 923 | replib          |

# My GC-MS Report

Compound Structure

Hit Spectrum

Isosativene

Formula C<sub>15</sub>H<sub>24</sub>, MW 204, CAS# 24959-83-9, Entry# 14356

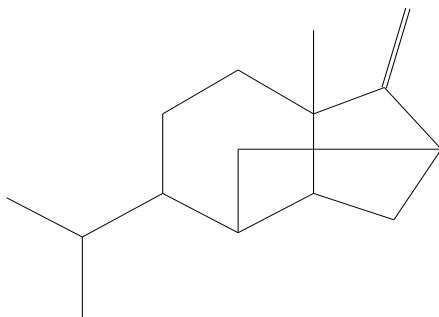

(-)-ISOSATIVENE

Formula C<sub>15</sub>H<sub>24</sub>, MW 204, CAS# 24959-83-9, Entry# 89650

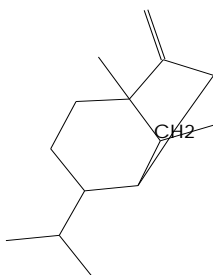

Isosativene

Formula C<sub>15</sub>H<sub>24</sub>, MW 204, CAS# 24959-83-9, Entry# 14330

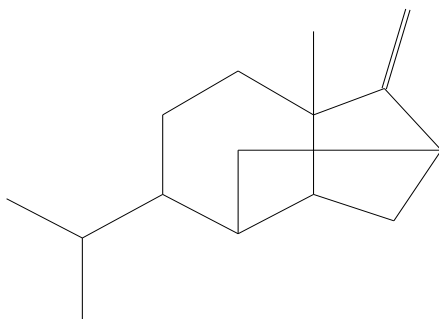

SI 938, RSI 958, replib, Entry# 14356, CAS# 24959-83-9, Isosativene

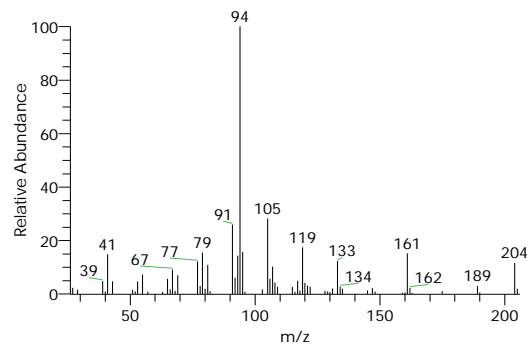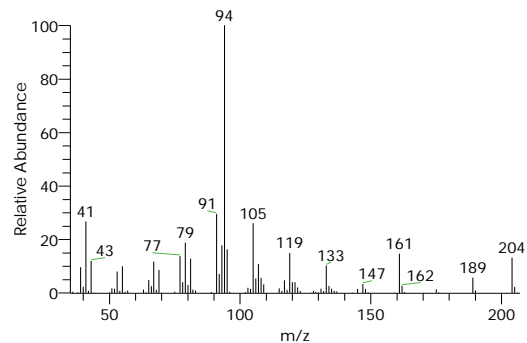

SI 917, RSI 923, replib, Entry# 14330, CAS# 24959-83-9, Isosativene

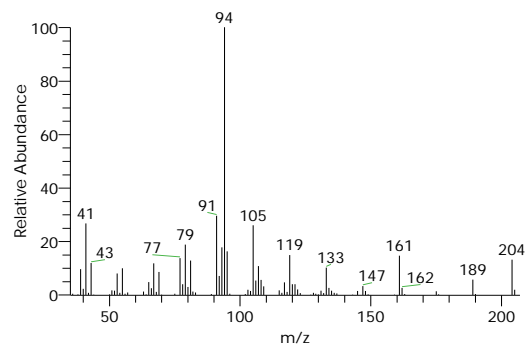

gerfa\_EA #3994 RT: 17.39 AV: 1 NL: 5.00E6  
T: + c EI Full ms [50.000-650.000]

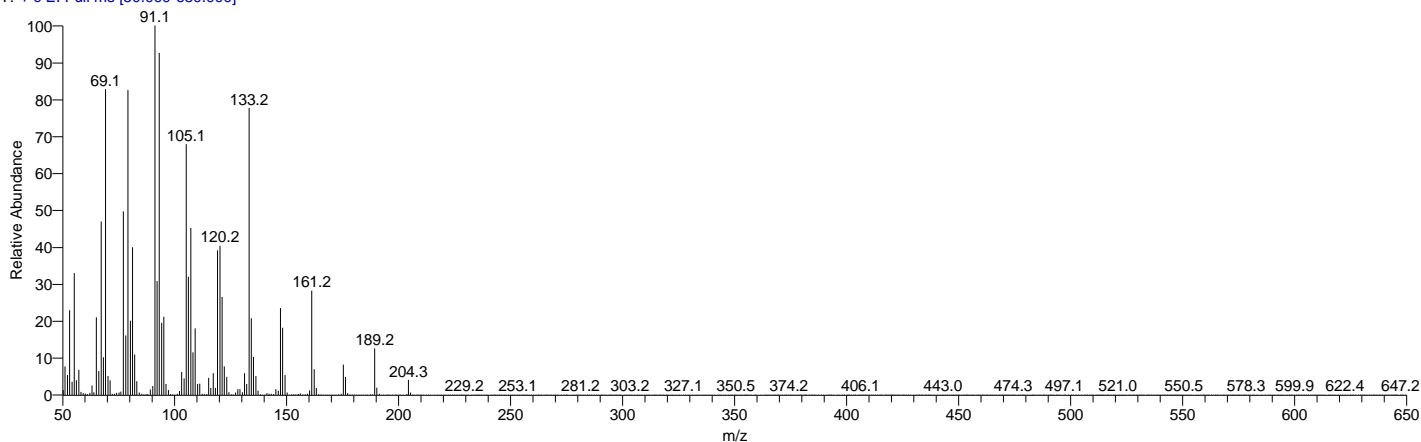

| RT    | Compound Name                                                                      | Area % | Molecular Formula               | Molecular Weight | Cas #   | MF  | Library             |
|-------|------------------------------------------------------------------------------------|--------|---------------------------------|------------------|---------|-----|---------------------|
| 17.39 | BICYCLO[7.2.0]UNDEC-4-ENE,<br>4,11,11-TRIMETHYL-8-METHYLENE-<br>[1R-(1R*,4E,9S*)]- | 0.38   | C <sub>15</sub> H <sub>24</sub> | 204              | 87-44-5 | 951 | WileyRegi<br>stry8e |

# My GC-MS Report

| RT                 | Compound Name                                                                 | Area % | Molecular Formula | Molecular Weight | Cas #   | MF  | Library             |
|--------------------|-------------------------------------------------------------------------------|--------|-------------------|------------------|---------|-----|---------------------|
| 17.39              | BICYCLO[7.2.0]UNDEC-4-ENE, 4,11,11-TRIMETHYL-8-METHYLENE-, [1R-(1R*,4E,9S*)]- | 0.38   | C15H24            | 204              | 87-44-5 | 948 | WileyRegi<br>stry8e |
| 17.39              | Caryophyllene                                                                 | 0.38   | C15H24            | 204              | 87-44-5 | 934 | mainlib             |
| Compound Structure |                                                                               |        |                   | Hit Spectrum     |         |     |                     |

BICYCLO[7.2.0]UNDEC-4-ENE, 4,11,11-TRIMETHYL-8-METHYLENE-, [1R-(1R\*,4E,9S\*)]-  
Formula C15H24, MW 204, CAS# 87-44-5, Entry# 89162  
2,6,10,10-TETRAMETHYLBICYCLO[7.2.0]UNDECA-1,6-DIENE #

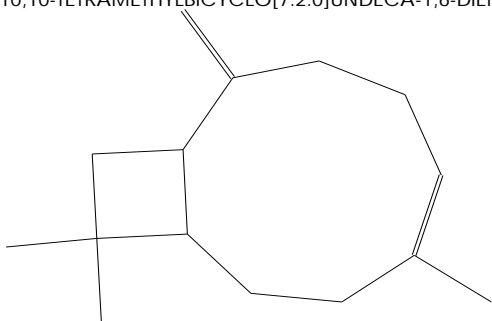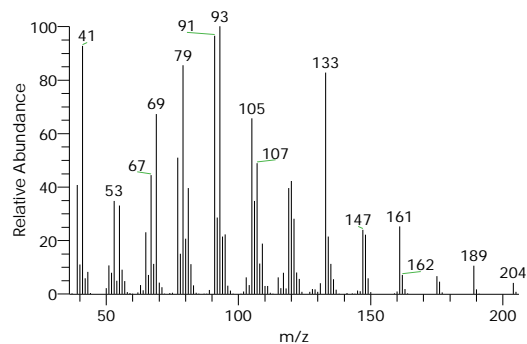

BICYCLO[7.2.0]UNDEC-4-ENE, 4,11,11-TRIMETHYL-8-METHYLENE-, [1R-(1R\*,4E,9S\*)]-  
Formula C15H24, MW 204, CAS# 87-44-5, Entry# 89170  
2,6,10,10-TETRAMETHYLBICYCLO[7.2.0]UNDECA-1,6-DIENE #

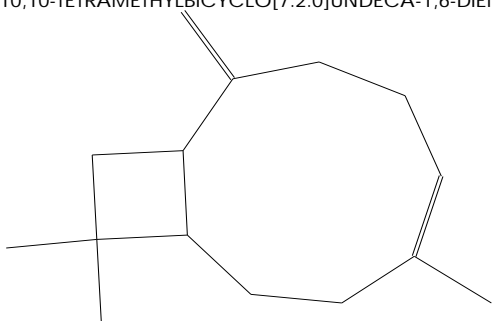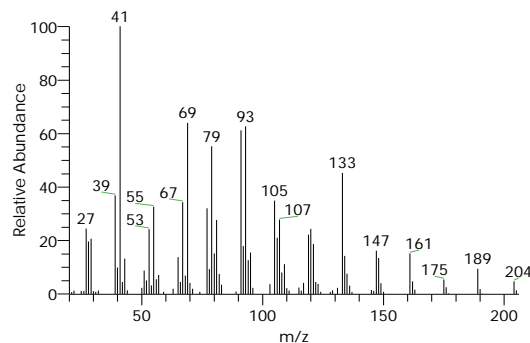

Caryophyllene

Formula C15H24, MW 204, CAS# 87-44-5, Entry# 66572

Bicyclo[7.2.0]undec-4-ene, 4,11,11-trimethyl-8-methylene-, [1R-(1R\*,4E,9S\*)]-

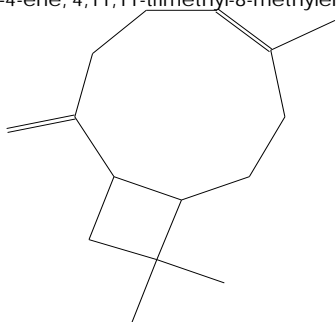

SI 932, RSI 934, mainlib, Entry# 66572, CAS# 87-44-5, Caryophyllene

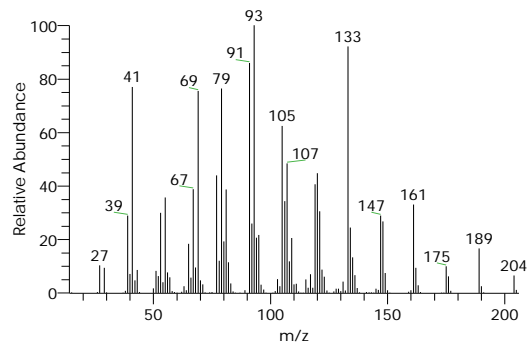

gerfa\_EA #4175 RT: 18.00 AV: 1 NL: 1.51E8  
T: + c EI Full ms [50.000-650.000]

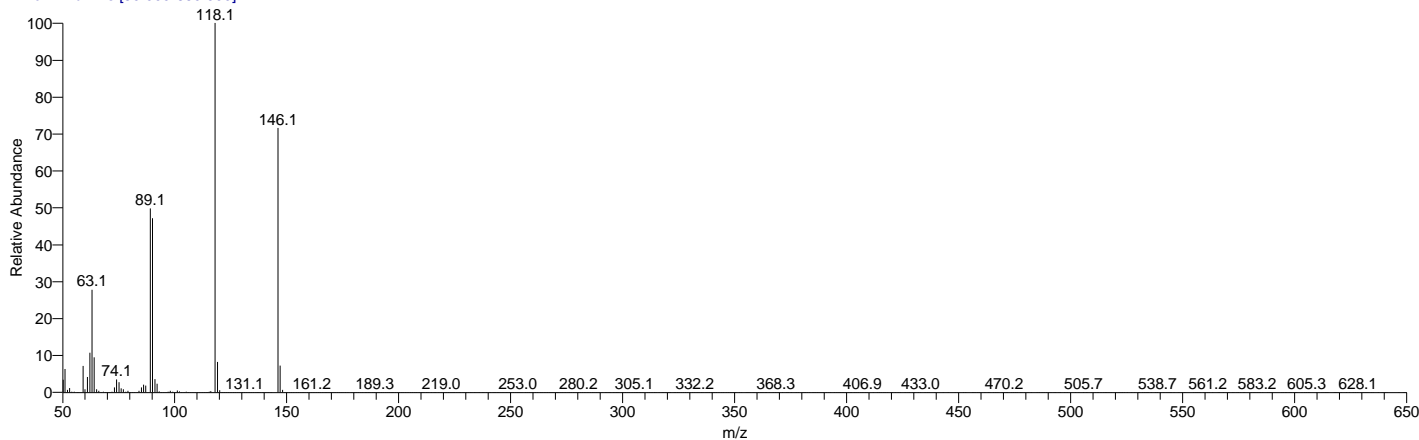

# My GC-MS Report

| RT                 | Compound Name         | Area % | Molecular Formula                            | Molecular Weight | Cas #   | MF  | Library      |
|--------------------|-----------------------|--------|----------------------------------------------|------------------|---------|-----|--------------|
| 18.00              | 2H-1-BENZOPYRAN-2-ONE | 9.92   | C <sub>9</sub> H <sub>6</sub> O <sub>2</sub> | 146              | 91-64-5 | 972 | WileyRegi    |
| 18.00              | Coumarin              | 9.92   | C <sub>9</sub> H <sub>6</sub> O <sub>2</sub> | 146              | 91-64-5 | 972 | stry8e       |
| 18.00              | Coumarin              | 9.92   | C <sub>9</sub> H <sub>6</sub> O <sub>2</sub> | 146              | 91-64-5 | 946 | replib       |
| Compound Structure |                       |        |                                              |                  |         |     | Hit Spectrum |

2H-1-BENZOPYRAN-2-ONE  
Formula C<sub>9</sub>H<sub>6</sub>O<sub>2</sub>, MW 146, CAS# 91-64-5, Entry# 30896  
CHROMEN-2-ONE

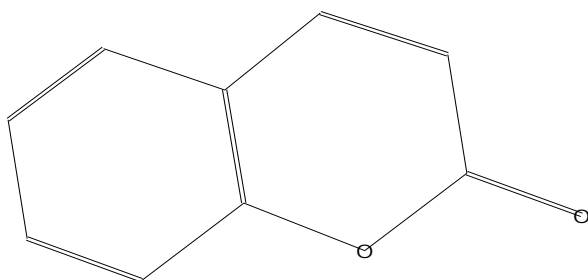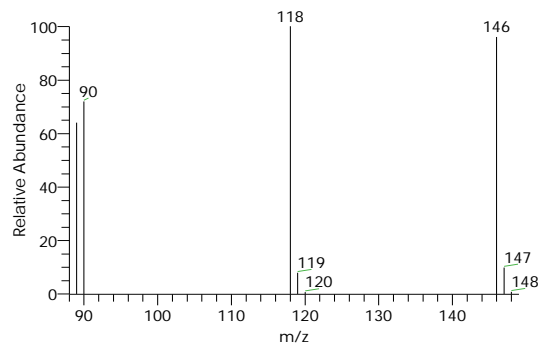

SI 960, RSI 972, replib, Entry# 18483, CAS# 91-64-5, Coumarin

Coumarin  
Formula C<sub>9</sub>H<sub>6</sub>O<sub>2</sub>, MW 146, CAS# 91-64-5, Entry# 18483  
2H-1-Benzopyran-2-one

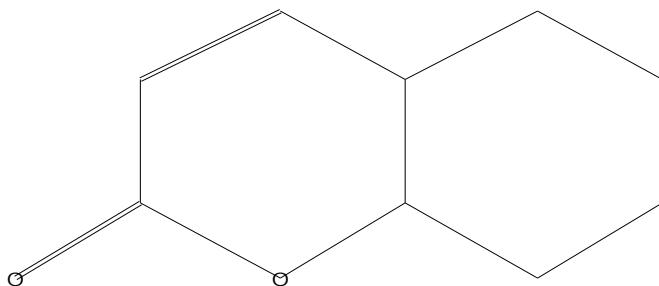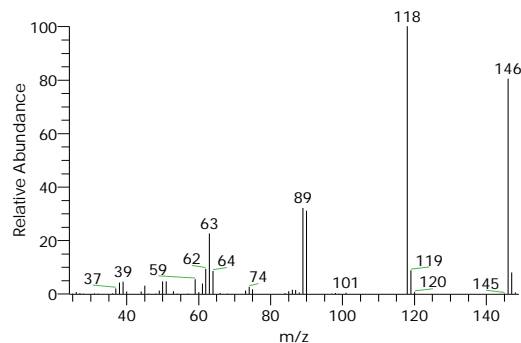

SI 946, RSI 946, replib, Entry# 18488, CAS# 91-64-5, Coumarin

Coumarin  
Formula C<sub>9</sub>H<sub>6</sub>O<sub>2</sub>, MW 146, CAS# 91-64-5, Entry# 18488  
2H-1-Benzopyran-2-one

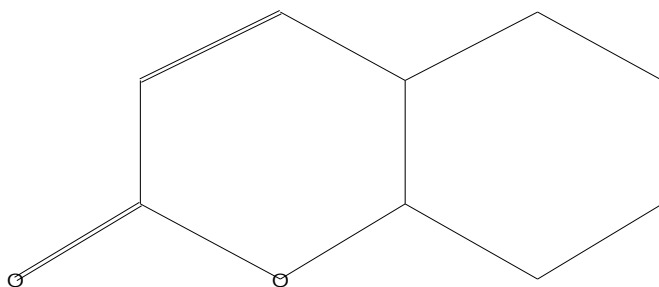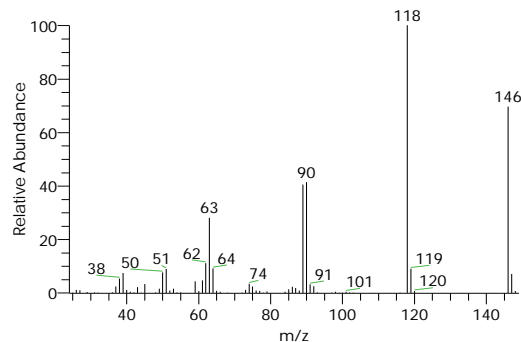

gerfa\_EA #4223 RT: 18.16 AV: 1 NL: 1.10E8  
T: + c EI Full ms [50.000-650.000]

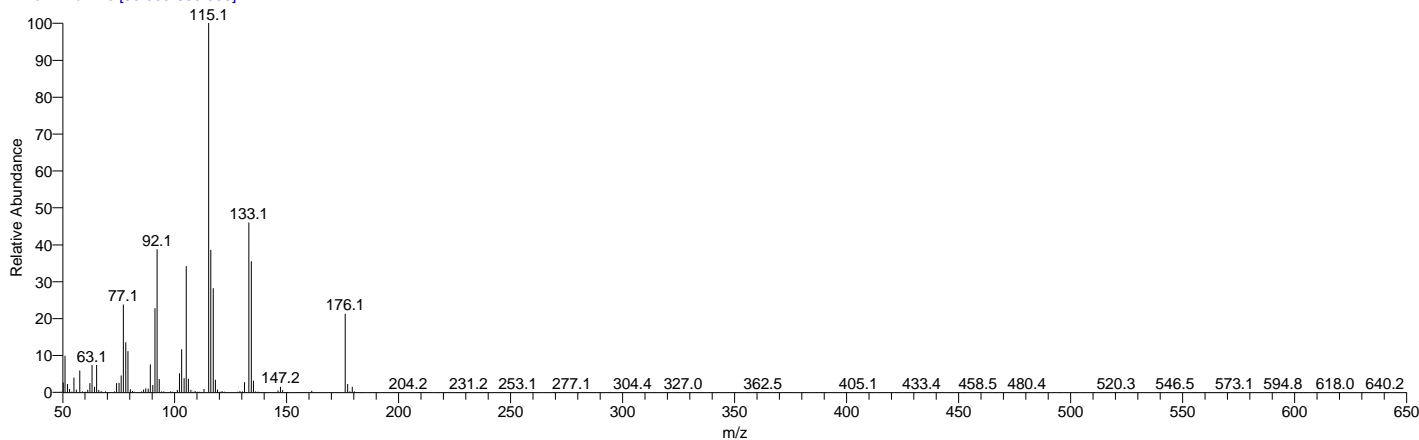



# My GC-MS Report

| RT    | Compound Name                     | Area % | Molecular Formula | Molecular Weight | Cas #      | MF  | Library             |
|-------|-----------------------------------|--------|-------------------|------------------|------------|-----|---------------------|
| 18.16 | Acetic acid, cinnamyl ester       | 4.83   | C11H12O2          | 176              | 103-54-8   | 955 | mainlib             |
| 18.16 | 2-PROPEN-1-OL, 3-PHENYL-, ACETATE | 4.83   | C11H12O2          | 176              | 103-54-8   | 943 | WileyRegi<br>stry8e |
| 18.16 | CINNAMYL ALCOHOL, ACETATE, (E)-   | 4.83   | C11H12O2          | 176              | 21040-45-9 | 968 | WileyRegi<br>stry8e |

## Compound Structure

## Hit Spectrum

Acetic acid, cinnamyl ester  
Formula C11H12O2, MW 176, CAS# 103-54-8, Entry# 11373  
2-Propen-1-ol, 3-phenyl-, acetate

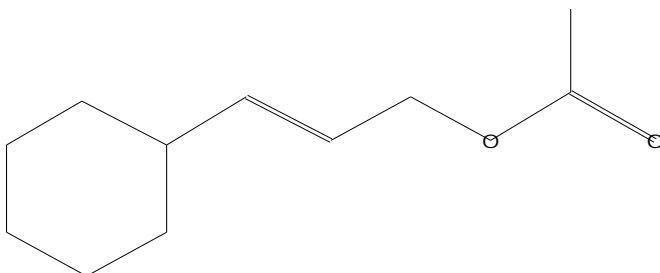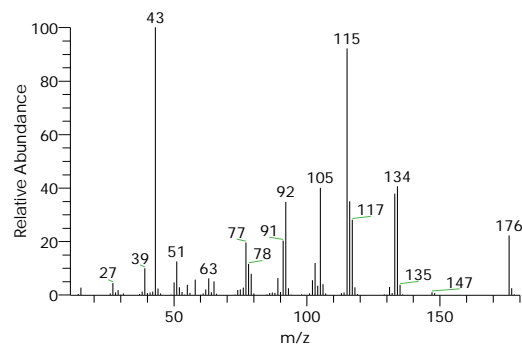

2-PROPEN-1-OL, 3-PHENYL-, ACETATE  
Formula C11H12O2, MW 176, CAS# 103-54-8, Entry# 58949  
ACETIC ACID CINNAMYL ESTER

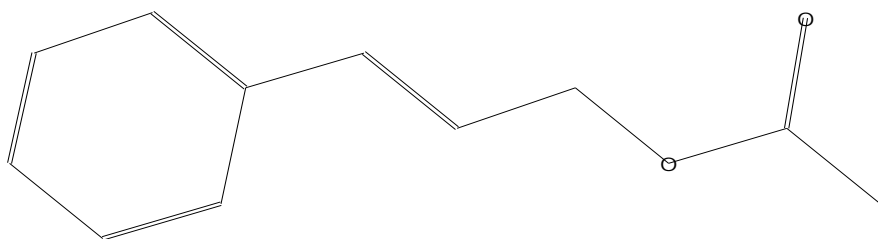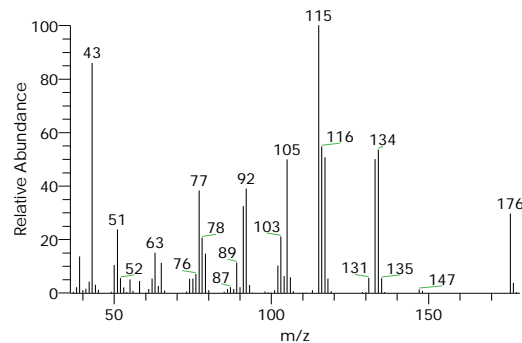

CINNAMYL ALCOHOL, ACETATE, (E)-  
Formula C11H12O2, MW 176, CAS# 21040-45-9, Entry# 59025  
(2E)-3-PHENYL-2-PROPENYL ACETATE #

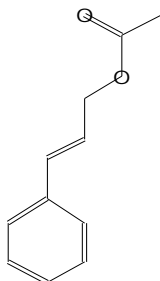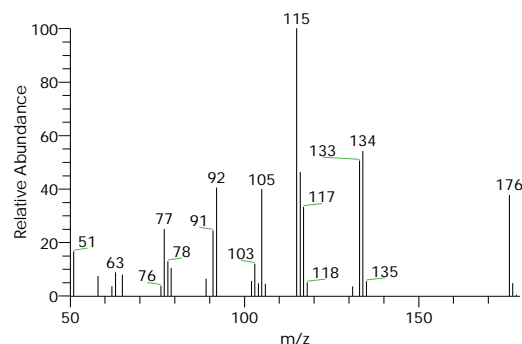

# My GC-MS Report

gerfa\_EA #4254 RT: 18.26 AV: 1 NL: 5.10E6  
T: + c EI Full ms [50.000-650.000]

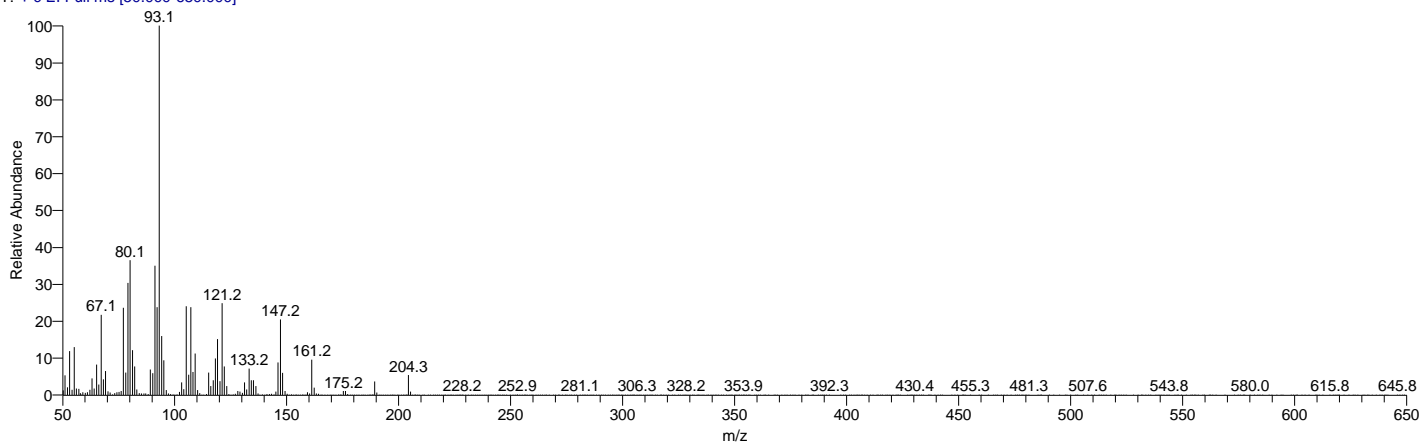

| RT                 | Compound Name                                           | Area % | Molecular Formula | Molecular Weight | Cas #  | MF  | Library         |
|--------------------|---------------------------------------------------------|--------|-------------------|------------------|--------|-----|-----------------|
| 18.26              | Humulene                                                | 0.11   | C15H24            | 204              | 6753-9 | 907 | replib          |
| 18.26              | Humulene                                                | 0.11   | C15H24            | 204              | 6753-9 | 895 | replib          |
| 18.26              | 1,4,8-CYCLOUNDECATRIENE, 2,6,6,9-TETRAMETHYL-, (E,E,E)- | 0.11   | C15H24            | 204              | 6753-9 | 871 | WileyRegistry8e |
| Compound Structure |                                                         |        |                   |                  |        |     | Hit Spectrum    |

Humulene  
Formula C15H24, MW 204, CAS# 6753-98-6, Entry# 14003  
à-Caryophyllene

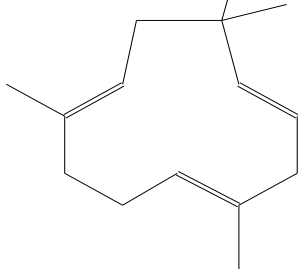

SI 887, RSI 907, replib, Entry# 14003, CAS# 6753-98-6, Humulene

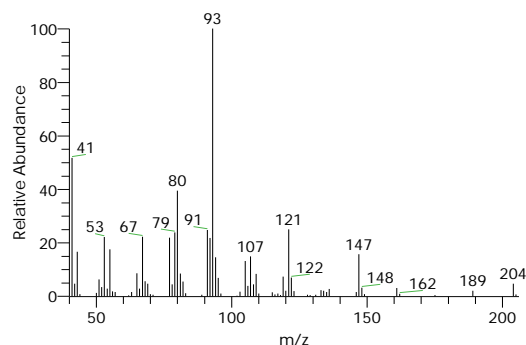

Humulene  
Formula C15H24, MW 204, CAS# 6753-98-6, Entry# 14104  
à-Caryophyllene

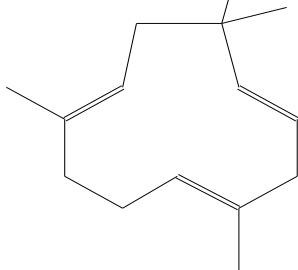

SI 861, RSI 895, replib, Entry# 14104, CAS# 6753-98-6, Humulene

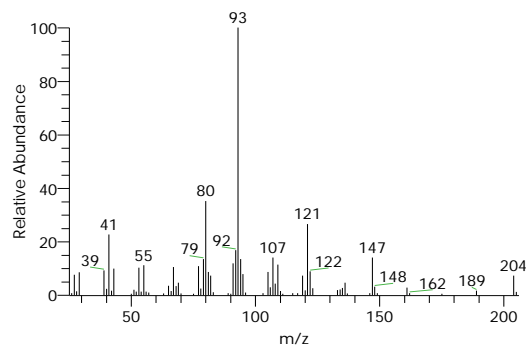

1,4,8-CYCLOUNDECATRIENE, 2,6,6,9-TETRAMETHYL-, (E,E,E)-  
Formula C15H24, MW 204, CAS# 6753-98-6, Entry# 89108  
2,6,6,9-TETRAMETHYL-1,4,8-CYCLOUNDECATRIENE #

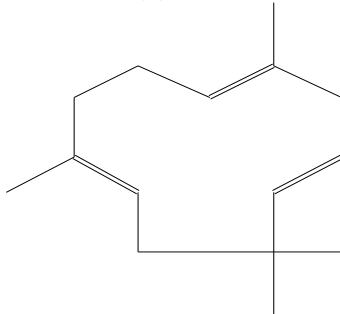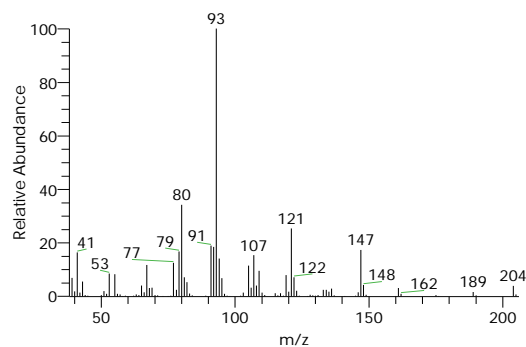

# My GC-MS Report

gerfa\_EA #4431 RT: 18.86 AV: 1 NL: 1.84E7  
T: + c EI Full ms [50.000-650.000]

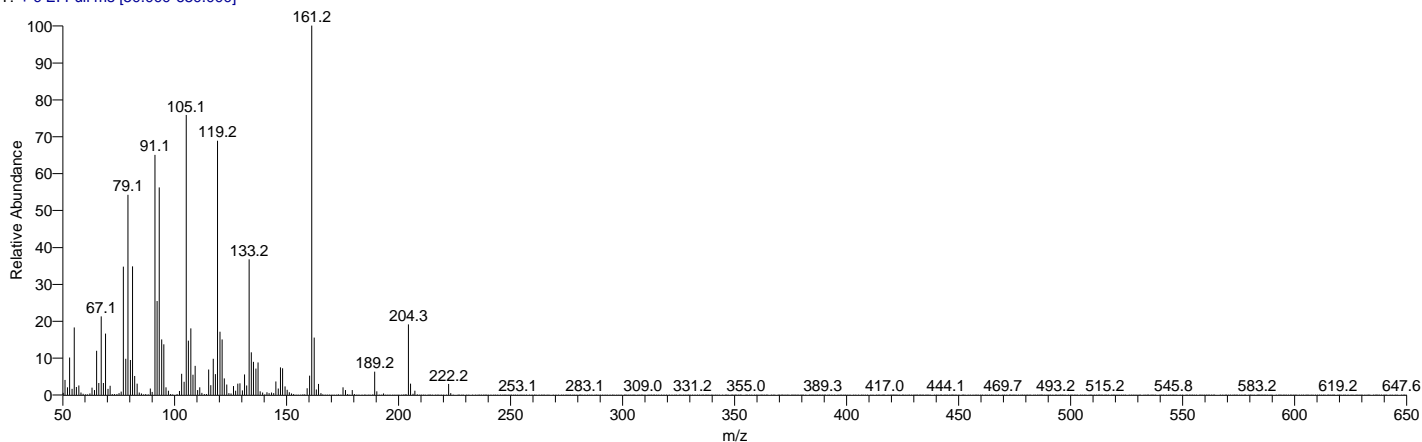

| RT    | Compound Name                                                        | Area % | Molecular Formula | Molecular Weight | Cas #      | MF  | Library |
|-------|----------------------------------------------------------------------|--------|-------------------|------------------|------------|-----|---------|
| 18.86 | $\zeta$ -Muurolene                                                   | 1.05   | C15H24            | 204              | 30021-74-0 | 938 | replib  |
| 18.86 | Naphthalene, 1,2,4a,5,6,8a-hexahydro-4,7-dimethyl-1-(1-methylethyl)- | 1.05   | C15H24            | 204              | 483-75-0   | 954 | replib  |
| 18.86 | $\zeta$ -Muurolene                                                   | 1.05   | C15H24            | 204              | 30021-74-0 | 929 | replib  |

## Compound Structure

## Hit Spectrum

$\zeta$ -Muurolene

Formula C15H24, MW 204, CAS# 30021-74-0, Entry# 24906

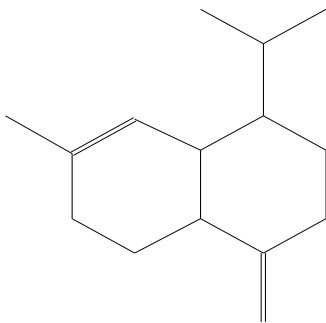

Naphthalene, 1,2,4a,5,6,8a-hexahydro-4,7-dimethyl-1-(1-methylethyl)-  
Formula C15H24, MW 204, CAS# 483-75-0, Entry# 24889  
1-Isopropyl-4,7-dimethyl-1,2,4a,5,6,8a-hexahydronaphthalene #

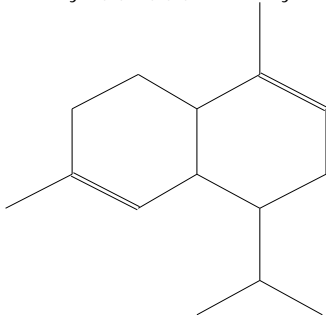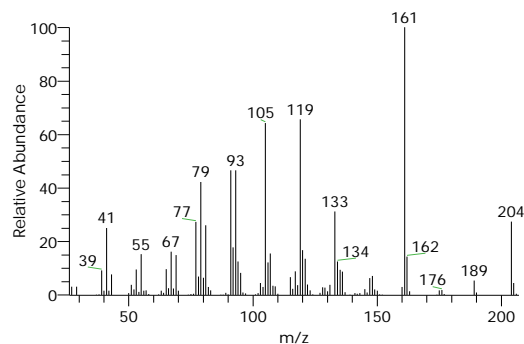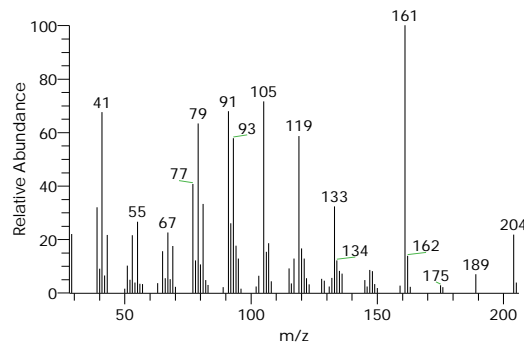

# My GC-MS Report

## Compound Structure

## Hit Spectrum

ç-Muurolene

Formula C<sub>15</sub>H<sub>24</sub>, MW 204, CAS# 30021-74-0, Entry# 24843

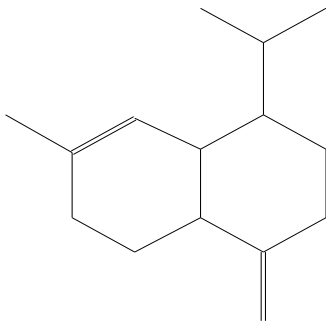

SI 909, RSI 929, replib, Entry# 24843, CAS# 30021-74-0, ç-Muurolene

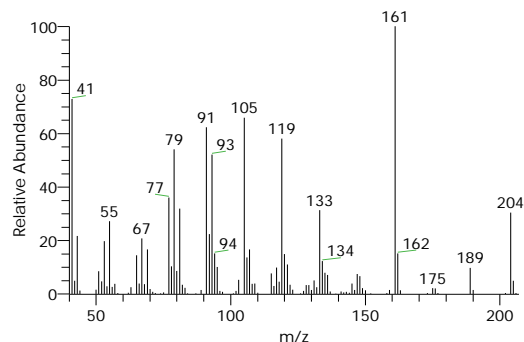

gerfa\_EA #4564 RT: 19.30 AV: 1 NL: 3.51E6  
T: + c EI Full ms [50.000-650.000]

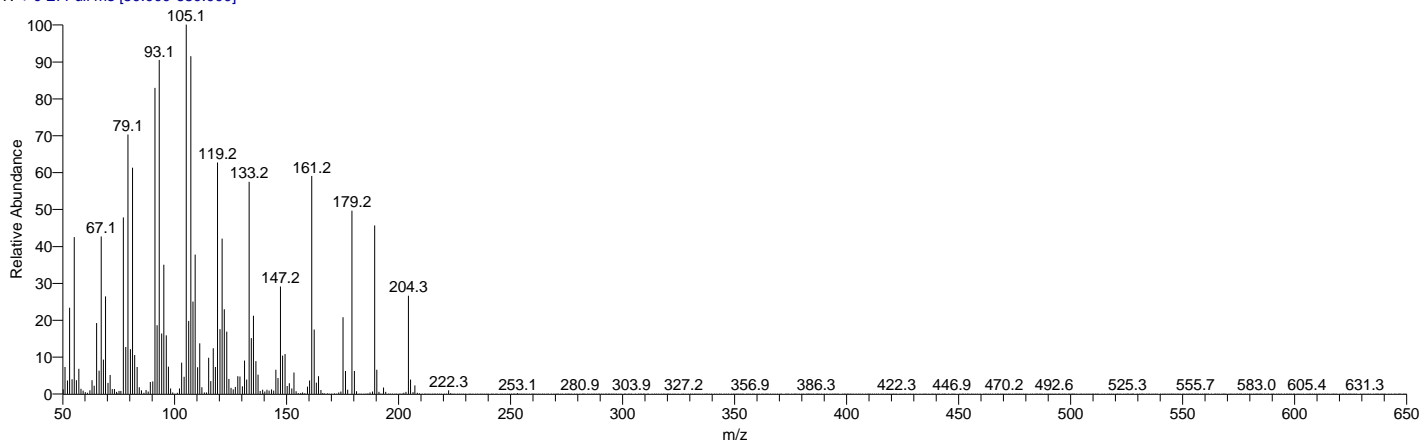

| RT    | Compound Name                                                                                 | Area % | Molecular Formula               | Molecular Weight | Cas #      | MF  | Library |
|-------|-----------------------------------------------------------------------------------------------|--------|---------------------------------|------------------|------------|-----|---------|
| 19.30 | Azulene, 1,2,3,3a,4,5,6,7-octahydro-1,4-dimethyl-7-(1-methylethenyl)-, [1R-(1à,3aà,4à,7á)]-   | 0.26   | C <sub>15</sub> H <sub>24</sub> | 204              | 22567-17-5 | 918 | replib  |
| 19.30 | Aromandendrene                                                                                | 0.26   | C <sub>15</sub> H <sub>24</sub> | 204              | 489-39-4   | 909 | replib  |
| 19.30 | Naphthalene, 1,2,3,5,6,7,8,8a-octahydro-1,8a-dimethyl-7-(1-methylethenyl)-, [1S-(1à,7à,8aà)]- | 0.26   | C <sub>15</sub> H <sub>24</sub> | 204              | 10219-75-7 | 898 | mainlib |

## Compound Structure

## Hit Spectrum

Azulene, 1,2,3,3a,4,5,6,7-octahydro-1,4-dimethyl-7-(1-methylethenyl)-, [1R-(1à,3aà,4à,7á)]-  
Formula C<sub>15</sub>H<sub>24</sub>, MW 204, CAS# 22567-17-5, Entry# 1321  
1á,4áH,10áH-Guaia-5,11-diene

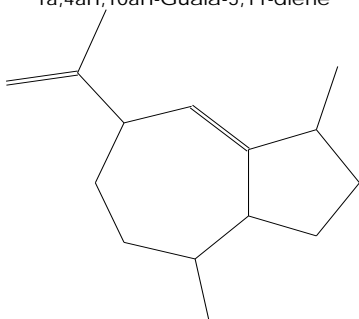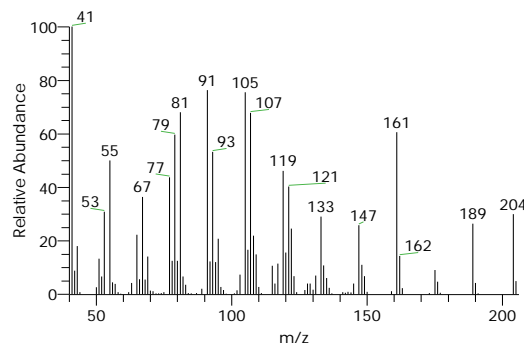

# My GC-MS Report

## Compound Structure

## Hit Spectrum

Aromandendrene  
Formula C<sub>15</sub>H<sub>24</sub>, MW 204, CAS# 489-39-4, Entry# 13310

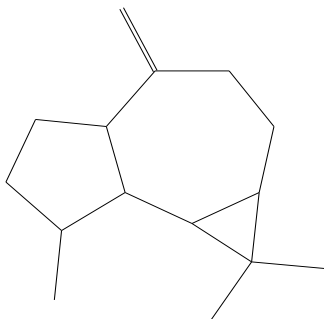

SI 860, RSI 909, replib, Entry# 13310, CAS# 489-39-4, Aromandendrene

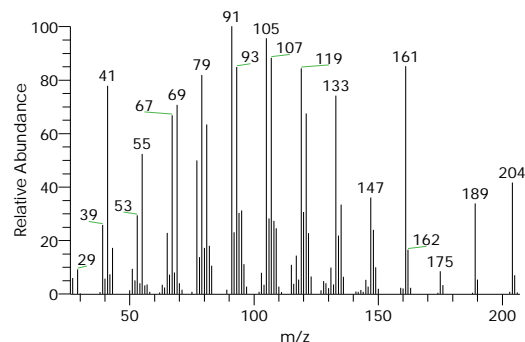

Formula C<sub>15</sub>H<sub>24</sub>, MW 204, CAS# 10219-75-7, Entry# 83645  
Eremophila-1(10),11-diene

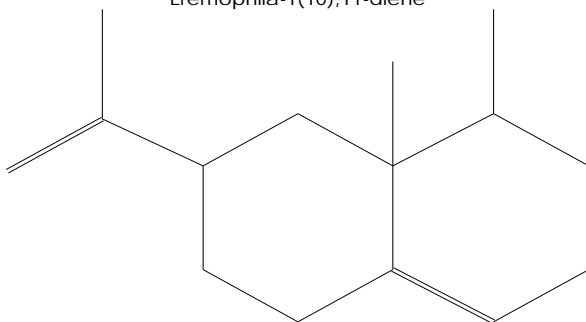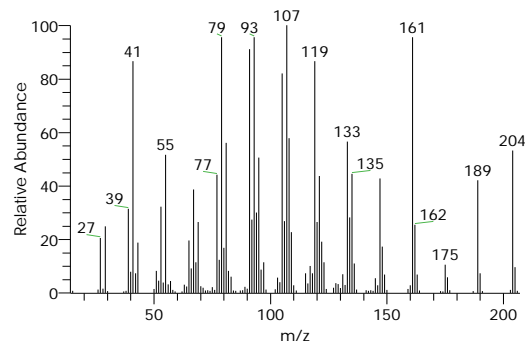

gerfa\_EA #4615 RT: 19.47 AV: 1 NL: 9.72E7  
T: + c EI Full ms [50.000-650.000]

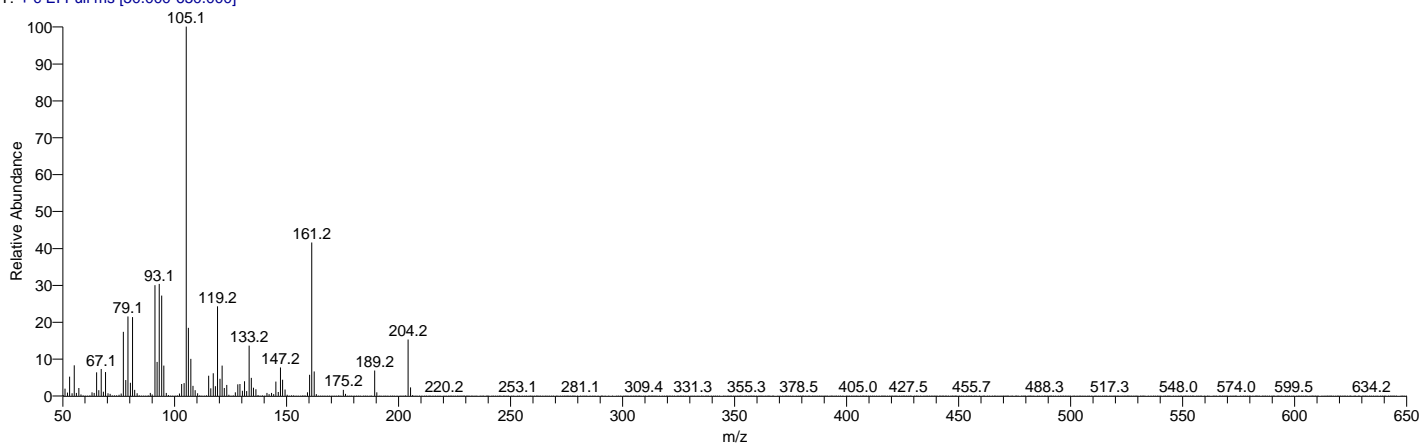

| RT    | Compound Name                                                                              | Area % | Molecular Formula               | Molecular Weight | Cas #          | MF  | Library             |
|-------|--------------------------------------------------------------------------------------------|--------|---------------------------------|------------------|----------------|-----|---------------------|
| 19.47 | à-Muurolene                                                                                | 4.14   | C <sub>15</sub> H <sub>24</sub> | 204              | 31983-2<br>2-9 | 960 | replib              |
| 19.47 | à-Muurolene                                                                                | 4.14   | C <sub>15</sub> H <sub>24</sub> | 204              | 10208-8<br>0-7 | 945 | replib              |
| 19.47 | NAPHTHALENE,<br>1,2,4A,5,6,8A-HEXAHYDRO-4,7-DIMETHYL<br>-1-(1-METHYLETHYL)-, (1à,4Aà,8Aà)- | 4.14   | C <sub>15</sub> H <sub>24</sub> | 204              | 31983-2<br>2-9 | 926 | WileyRegi<br>stry8e |

# My GC-MS Report

Compound Structure

Hit Spectrum

à-Muurolene

Formula C<sub>15</sub>H<sub>24</sub>, MW 204, CAS# 31983-22-9, Entry# 16421

[1à,4aà,8aà]-1,2,4a,5,6,8a-hexahydro-4,7-dimethyl-1-[1-methylethyl]naphthalene

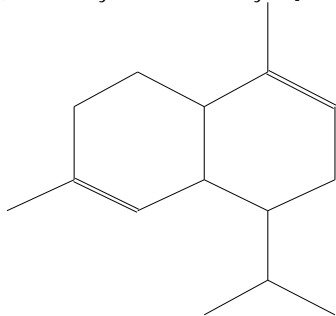

SI 952, RSI 960, replib, Entry# 16421, CAS# 31983-22-9, à-Muurolene

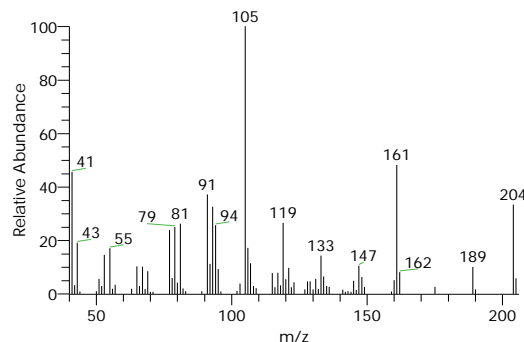

à-Muurolene

Formula C<sub>15</sub>H<sub>24</sub>, MW 204, CAS# 10208-80-7, Entry# 16423

Naphthalene, 1,2,4a,5,6,8a-hexahydro-4,7-dimethyl-1-(1-methylethyl)-, (1S,4aS,8aR)-

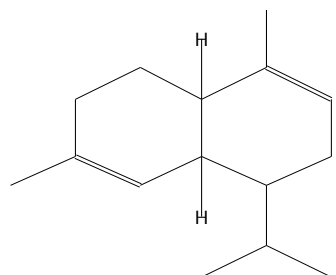

SI 945, RSI 945, replib, Entry# 16423, CAS# 10208-80-7, à-Muurolene

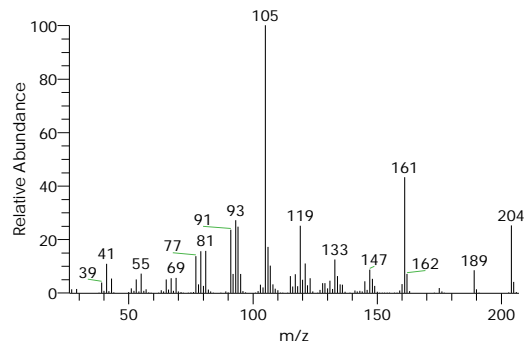

NAPHTHALENE, 1,2,4A,5,6,8A-HEXAHYDRO-4,7-DIMETHYL-1-(1-METHYLETHYL)-, (1à,4Aà,8Aà)-

Formula C<sub>15</sub>H<sub>24</sub>, MW 204, CAS# 31983-22-9, Entry# 89350

NAPHTHALENE, 1,2,4Aa,5,6,8Aa-HEXAHYDRO-1a-ISOPROPYL-4,7-DIMETHYL-

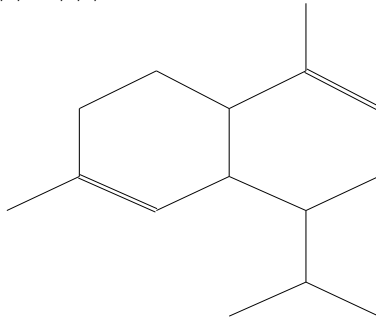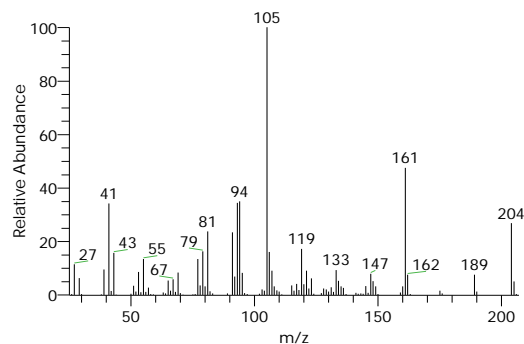

gerfa\_EA #4670 RT: 19.66 AV: 1 NL: 2.58E6  
T: + c EI Full ms [50.000-650.000]

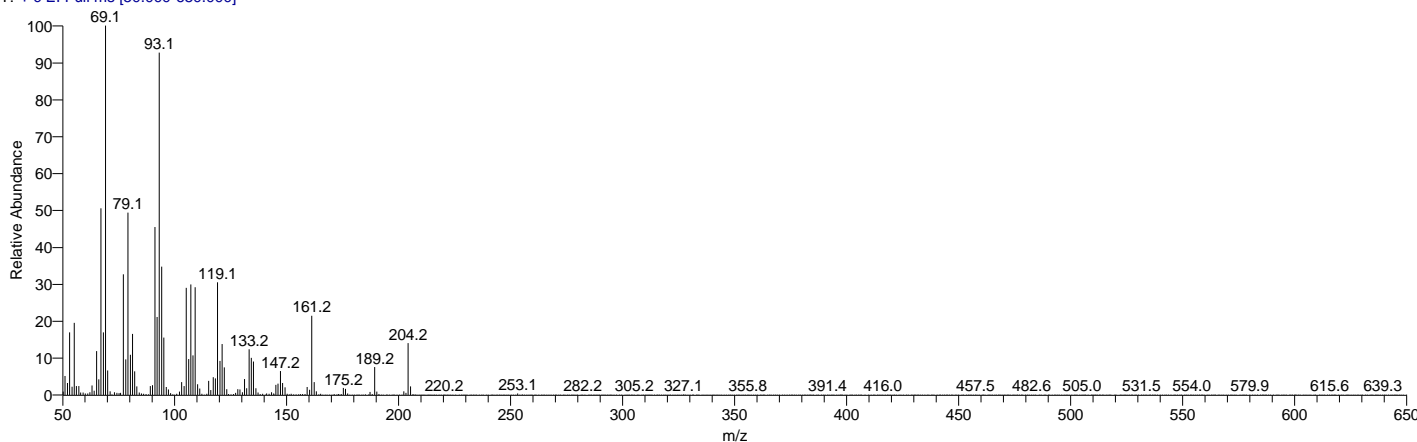

| RT    | Compound Name                                                   | Area % | Molecular Formula               | Molecular Weight | Cas #    | MF  | Library         |
|-------|-----------------------------------------------------------------|--------|---------------------------------|------------------|----------|-----|-----------------|
| 19.66 | CYCLOHEXENE, 1-METHYL-4-(5-METHYL-1-METHYLENE-4-HEXENYL)-, (S)- | 0.12   | C <sub>15</sub> H <sub>24</sub> | 204              | 495-61-4 | 933 | WileyRegistry8e |
| 19.66 | à-Bisabolene                                                    | 0.12   | C <sub>15</sub> H <sub>24</sub> | 204              | 495-61-4 | 896 | replib          |

# My GC-MS Report

| RT                 | Compound Name                                             | Area % | Molecular Formula | Molecular Weight | Cas # | MF  | Library         |
|--------------------|-----------------------------------------------------------|--------|-------------------|------------------|-------|-----|-----------------|
| 19.66              | 1-METHYL-4-(5-METHYL-1-METHYLENE-4-HEXENYL)-1-CYCLOHEXENE | 0.12   | C15H24            | 204              | NA    | 896 | WileyRegistry8e |
| Compound Structure |                                                           |        |                   | Hit Spectrum     |       |     |                 |

CYCLOHEXENE, 1-METHYL-4-(5-METHYL-1-METHYLENE-4-HEXENYL)-, (S)-  
Formula C15H24, MW 204, CAS# 495-61-4, Entry# 89082  
1-METHYL-4-(5-METHYL-1-METHYLENE-4-HEXENYL)-1-CYCLOHEXENE #

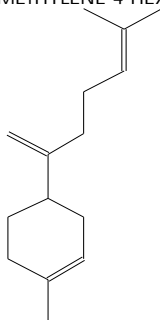

α-Bisabolene

Formula C15H24, MW 204, CAS# 495-61-4, Entry# 8536  
Cyclohexene, 1-methyl-4-(5-methyl-1-methylene-4-hexenyl)-, (S)-

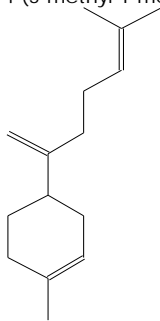

1-METHYL-4-(5-METHYL-1-METHYLENE-4-HEXENYL)-1-CYCLOHEXENE  
Formula C15H24, MW 204, CAS# NA, Entry# 388678  
BETA-BISABOLEN

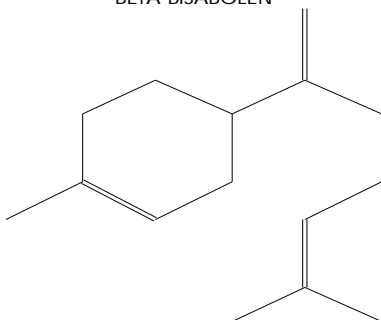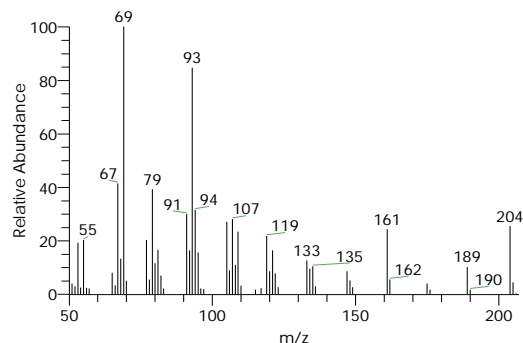

SI 889, RSI 896, replib, Entry# 8536, CAS# 495-61-4, α-Bisabolene

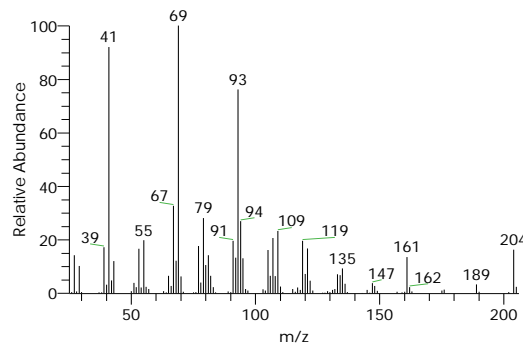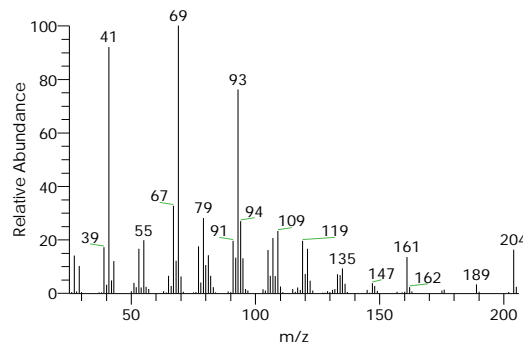

gerfa\_EA #4704 RT: 19.77 AV: 1 NL: 3.33E6  
T: + c EI Full ms [50.000-650.000]

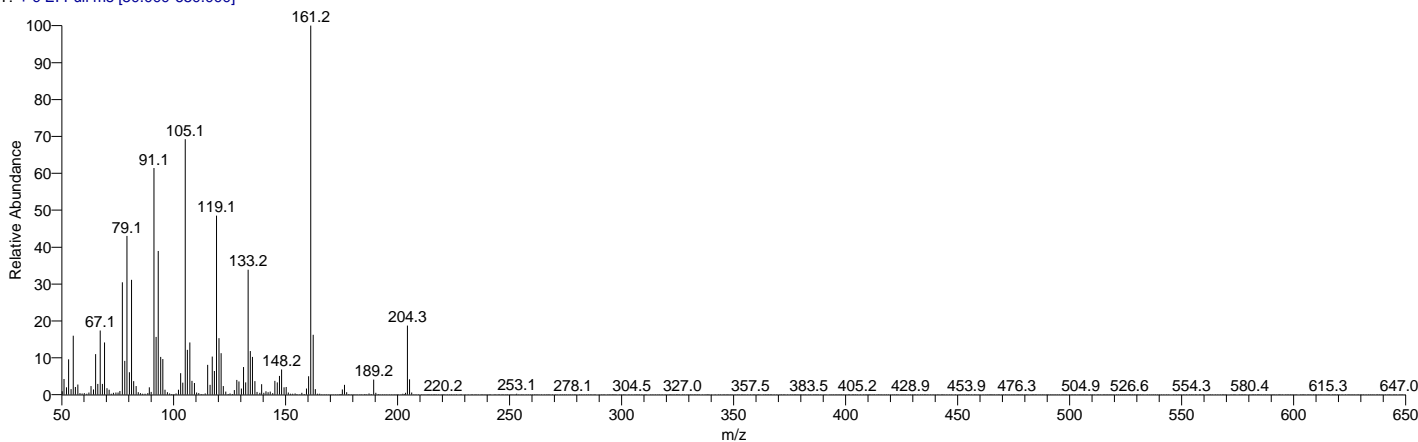

# My GC-MS Report

| RT    | Compound Name                                                                                          | Area % | Molecular Formula | Molecular Weight | Cas #          | MF  | Library |
|-------|--------------------------------------------------------------------------------------------------------|--------|-------------------|------------------|----------------|-----|---------|
| 19.77 | Naphthalene,<br>1,2,3,4,4a,5,6,8a-octahydro-7-methyl-4-methyle<br>ne-1-(1-methylethyl)-, (1à,4aá,8aà)- | 0.18   | C15H24            | 204              | 39029-4<br>1-9 | 932 | replib  |
| 19.77 | Naphthalene,<br>1,2,3,4,4a,5,6,8a-octahydro-7-methyl-4-methyle<br>ne-1-(1-methylethyl)-, (1à,4aá,8aà)- | 0.18   | C15H24            | 204              | 39029-4<br>1-9 | 932 | replib  |
| 19.77 | ç-Muurolene                                                                                            | 0.18   | C15H24            | 204              | 30021-7<br>4-0 | 929 | replib  |

Compound Structure

Hit Spectrum

Formula C15H24, MW 204, CAS# 39029-41-9, Entry# 24895  
ç-Cadinene

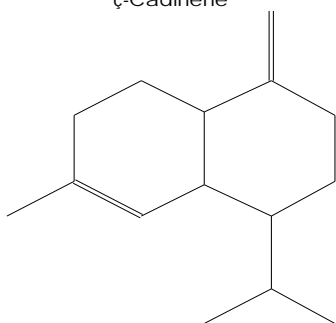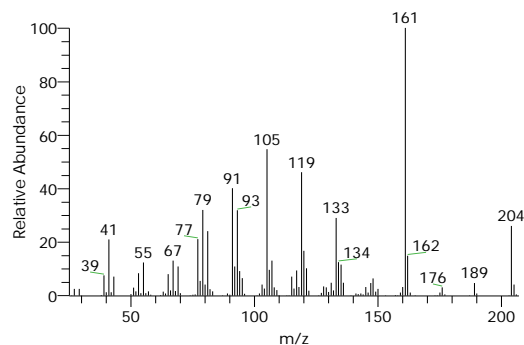

Formula C15H24, MW 204, CAS# 39029-41-9, Entry# 24890  
ç-Cadinene

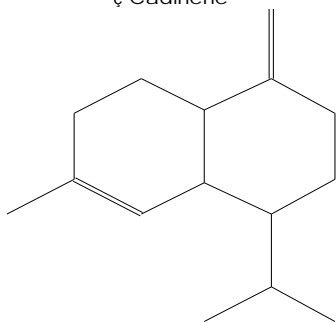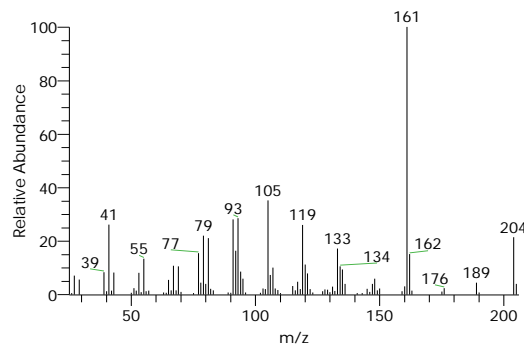

ç-Muurolene

Formula C15H24, MW 204, CAS# 30021-74-0, Entry# 24906

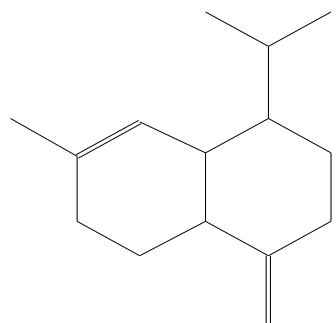

SI 921, RSI 929, replib, Entry# 24906, CAS# 30021-74-0, ç-Muurolene

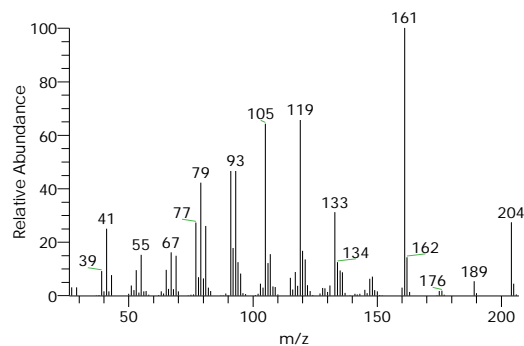



# My GC-MS Report

gerfa\_EA #4785 RT: 20.04 AV: 1 NL: 6.19E7  
T: + c EI Full ms [50.000-650.000]

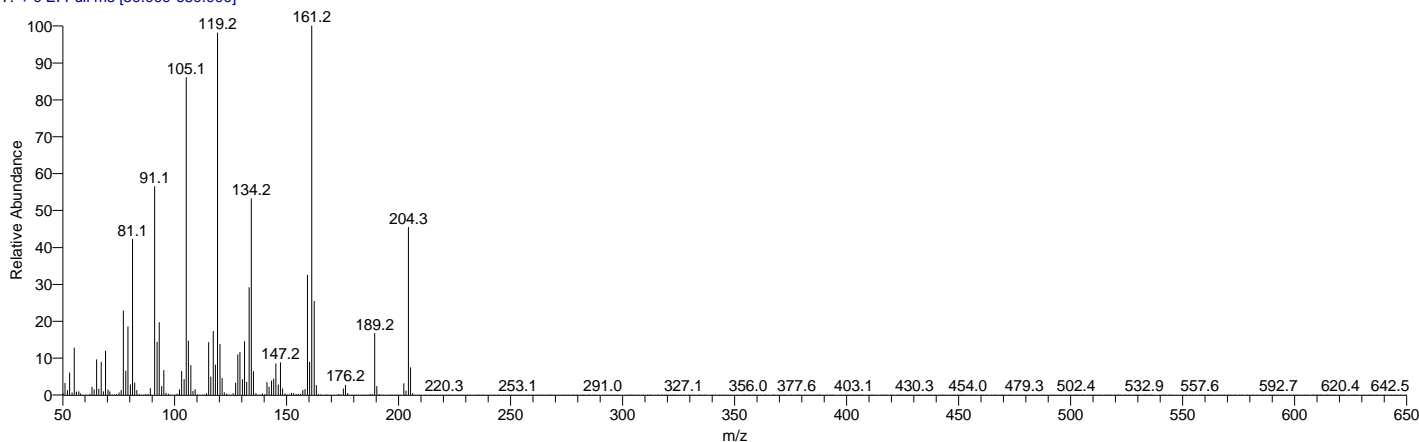

| RT    | Compound Name                                                                  | Area % | Molecular Formula | Molecular Weight | Cas #      | MF  | Library         |
|-------|--------------------------------------------------------------------------------|--------|-------------------|------------------|------------|-----|-----------------|
| 20.04 | NAPHTHALENE, 1,2,3,5,6,8A-HEXAHYDRO-4,7-DIMETHYL-1-(1-METHYLETHYL)-, (1S-CIS)- | 4.78   | C15H24            | 204              | 483-76-1   | 942 | WileyRegistry8e |
| 20.04 | NAPHTHALENE, 1,2,3,5,6,8A-HEXAHYDRO-4,7-DIMETHYL-1-(1-METHYLETHYL)-, (1S-CIS)- | 4.78   | C15H24            | 204              | 483-76-1   | 900 | WileyRegistry8e |
| 20.04 | 1-Isopropyl-4,7-dimethyl-1,2,3,5,6,8a-hexahydronaphthalene                     | 4.78   | C15H24            | 204              | 16729-01-4 | 921 | mainlib         |

## Compound Structure

## Hit Spectrum

NAPHTHALENE, 1,2,3,5,6,8A-HEXAHYDRO-4,7-DIMETHYL-1-(1-METHYLETHYL)-, (1S-CIS)-  
Formula C15H24, MW 204, CAS# 483-76-1, Entry# 89277  
1-ISOPROPYL-4,7-DIMETHYL-1,2,3,5,6,8A-HEXAHYDRONAPHTHALENE #

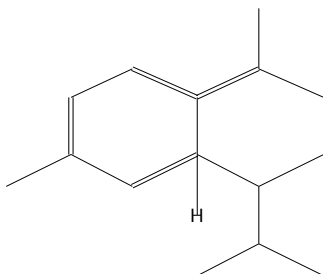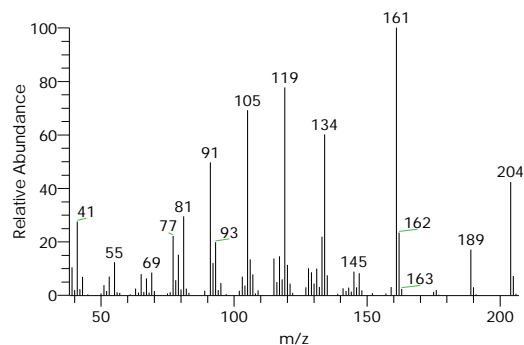

NAPHTHALENE, 1,2,3,5,6,8A-HEXAHYDRO-4,7-DIMETHYL-1-(1-METHYLETHYL)-, (1S-CIS)-  
Formula C15H24, MW 204, CAS# 483-76-1, Entry# 89273  
1-ISOPROPYL-4,7-DIMETHYL-1,2,3,5,6,8A-HEXAHYDRONAPHTHALENE #

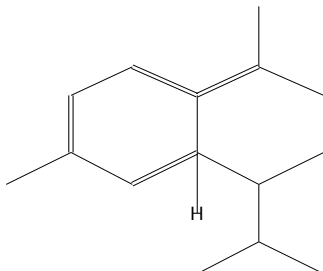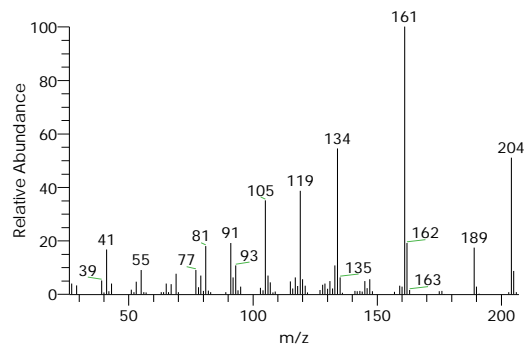

# My GC-MS Report

Compound Structure

Hit Spectrum

1-Isopropyl-4,7-dimethyl-1,2,3,5,6,8a-hexahydronaphthalene  
Formula C<sub>15</sub>H<sub>24</sub>, MW 204, CAS# 16729-01-4, Entry# 150583  
Cadina-1(10),4-diene

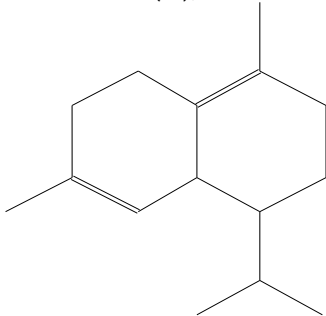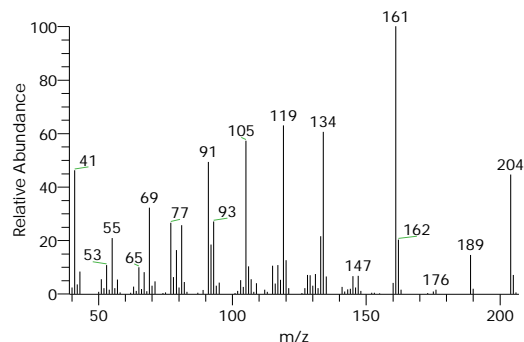

gerfa\_EA #4838 RT: 20.22 AV: 1 NL: 9.18E7  
T: + c EI Full ms [50.000-650.000]

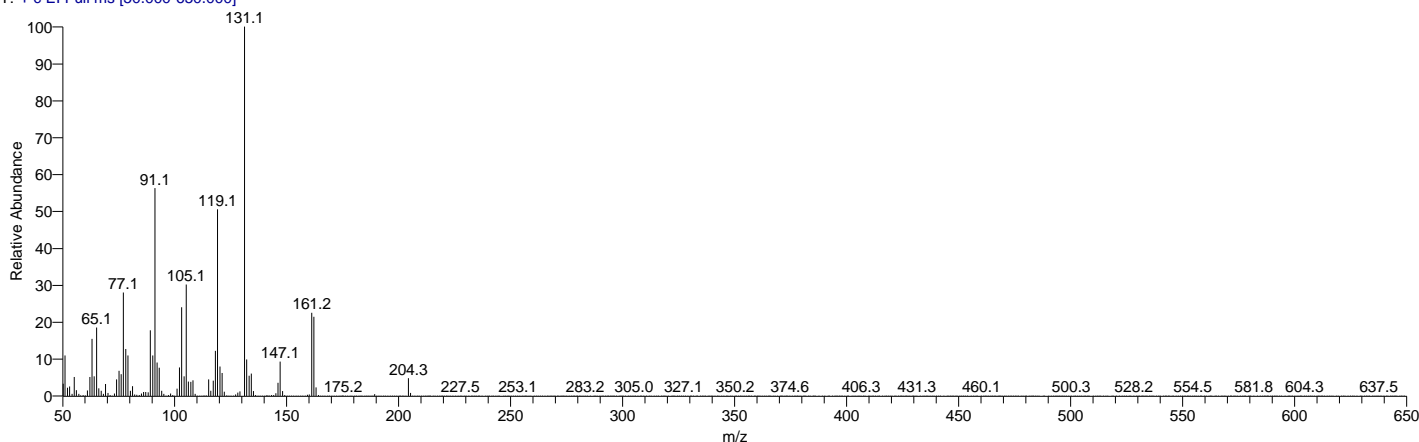

| RT    | Compound Name                         | Area % | Molecular Formula                              | Molecular Weight | Cas #  | MF  | Library   |
|-------|---------------------------------------|--------|------------------------------------------------|------------------|--------|-----|-----------|
| 20.22 | 2-PROPENAL, 3-(4-METHOXYPHENYL)-      | 4.91   | C <sub>10</sub> H <sub>10</sub> O <sub>2</sub> | 162              | 1963-3 | 883 | WileyRegi |
| 20.22 | (2E)-3-(2-METHOXYPHENYL)-2-PROPENAL # | 4.91   | C <sub>10</sub> H <sub>10</sub> O <sub>2</sub> | 162              | 1504-7 | 891 | WileyRegi |
| 20.22 | 2-Propenal, 3-(2-methoxyphenyl)-      | 4.91   | C <sub>10</sub> H <sub>10</sub> O <sub>2</sub> | 162              | 1504-7 | 876 | mainlib   |

Compound Structure

Hit Spectrum

2-PROPENAL, 3-(4-METHOXYPHENYL)-  
Formula C<sub>10</sub>H<sub>10</sub>O<sub>2</sub>, MW 162, CAS# 1963-36-6, Entry# 45236  
CINNAMALDEHYDE, P-METHOXY-

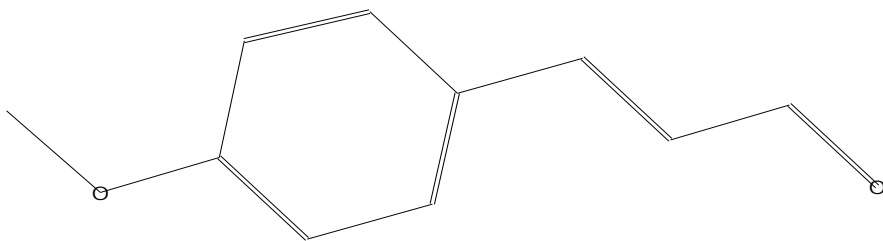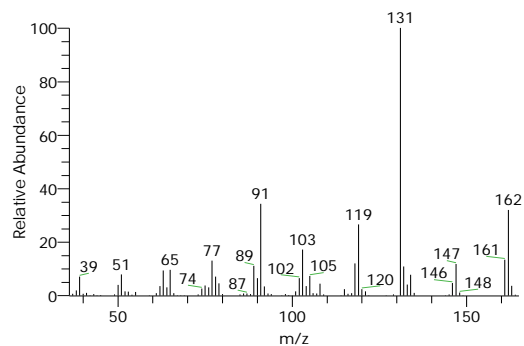

# My GC-MS Report

Compound Structure

Hit Spectrum

(2E)-3-(2-METHOXYPHENYL)-2-PROPENAL #  
Formula C<sub>10</sub>H<sub>10</sub>O<sub>2</sub>, MW 162, CAS# 1504-74-1, Entry# 45156  
(2E)-3-(2-METHOXYPHENYL)-2-PROPENAL

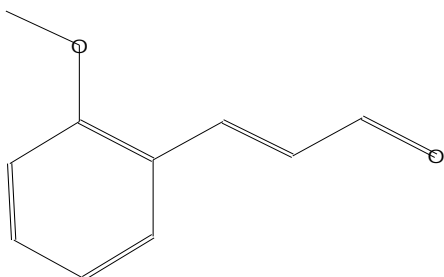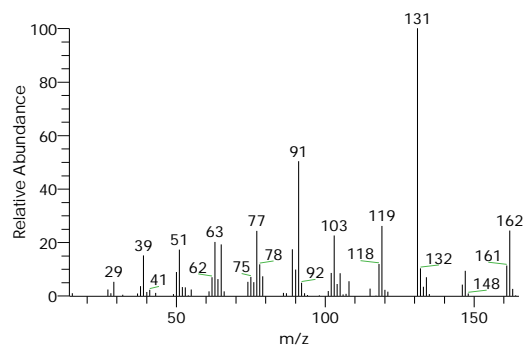

2-Propenal, 3-(2-methoxyphenyl)-  
Formula C<sub>10</sub>H<sub>10</sub>O<sub>2</sub>, MW 162, CAS# 1504-74-1, Entry# 115637  
Cinnamaldehyde, o-methoxy-

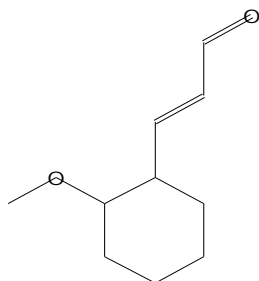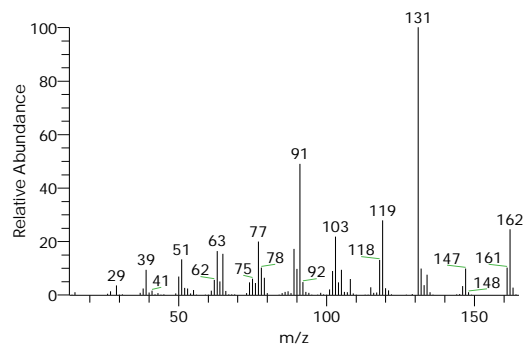

gerfa\_EA #4912 RT: 20.47 AV: 1 NL: 1.55E7  
T: + c EI Full ms [50.000-650.000]

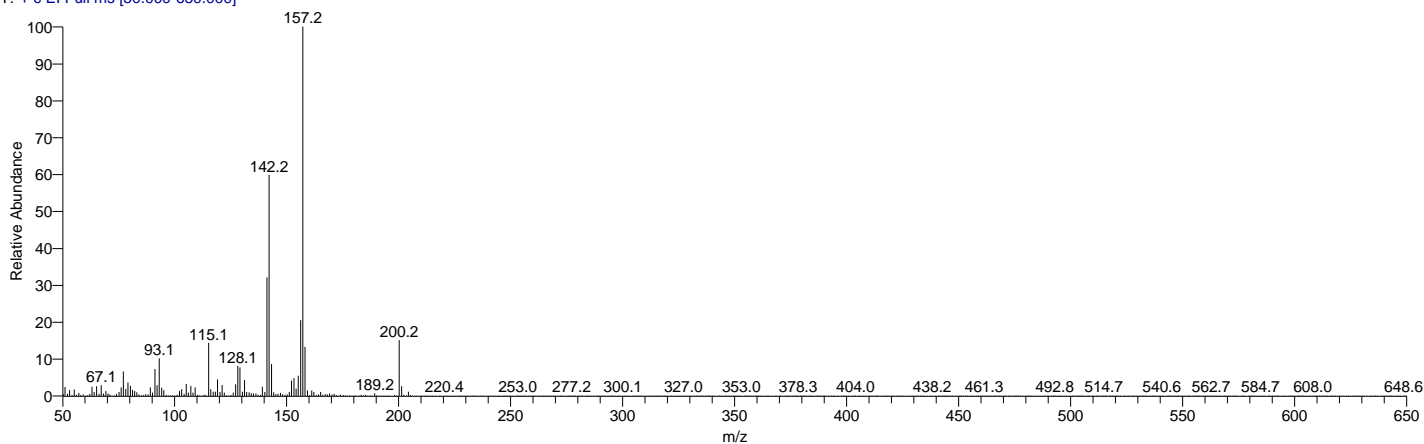

| RT    | Compound Name                                                  | Area % | Molecular Formula               | Molecular Weight | Cas #      | MF  | Library         |
|-------|----------------------------------------------------------------|--------|---------------------------------|------------------|------------|-----|-----------------|
| 20.47 | 4-Isopropyl-6-methyl-1-methylene-1,2,3,4-tetrahydronaphthalene | 0.43   | C <sub>15</sub> H <sub>20</sub> | 200              | 50277-34-4 | 934 | mainlib         |
| 20.47 | 1,1,6-TRIMETHYL-1,2-DIHYDRO NAPHTHALENE                        | 0.43   | C <sub>13</sub> H <sub>16</sub> | 172              | NA         | 956 | WileyRegistry8e |
| 20.47 | à-Calacorene                                                   | 0.43   | C <sub>15</sub> H <sub>20</sub> | 200              | 21391-99-1 | 940 | mainlib         |

# My GC-MS Report

Compound Structure

Hit Spectrum

4-Isopropyl-6-methyl-1-methylene-1,2,3,4-tetrahydronaphthalene  
Formula C<sub>15</sub>H<sub>20</sub>, MW 200, CAS# 50277-34-4, Entry# 146807  
Naphthalene, 1,2,3,4-tetrahydro-6-methyl-1-methylene-4-(1-methylethyl)-

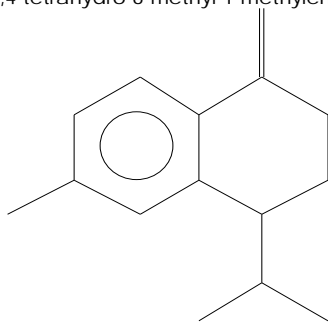

1,1,6-TRIMETHYL-1,2-DIHYDRO NAPHTHALENE  
Formula C<sub>13</sub>H<sub>16</sub>, MW 172, CAS# NA, Entry# 56092  
CALACORENE

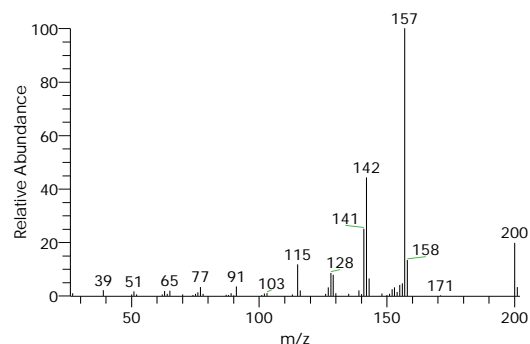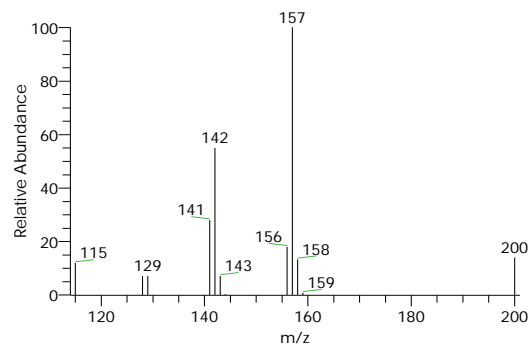

à-Calacorene  
Formula C<sub>15</sub>H<sub>20</sub>, MW 200, CAS# 21391-99-1, Entry# 146806  
1-Isopropyl-4,7-dimethyl-1,2-dihydronaphthalene, (S)-

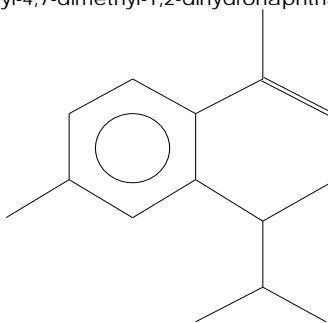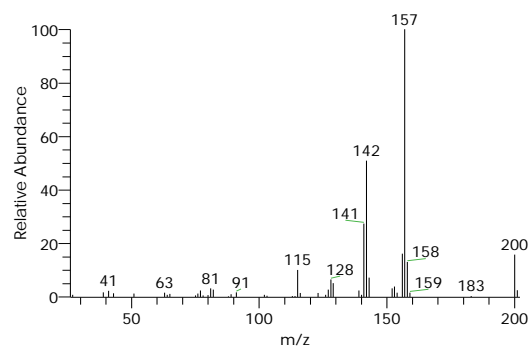

gerfa\_EA #5102 RT: 21.11 AV: 1 NL: 3.41E6  
T: + c EI Full ms [50.000-650.000]

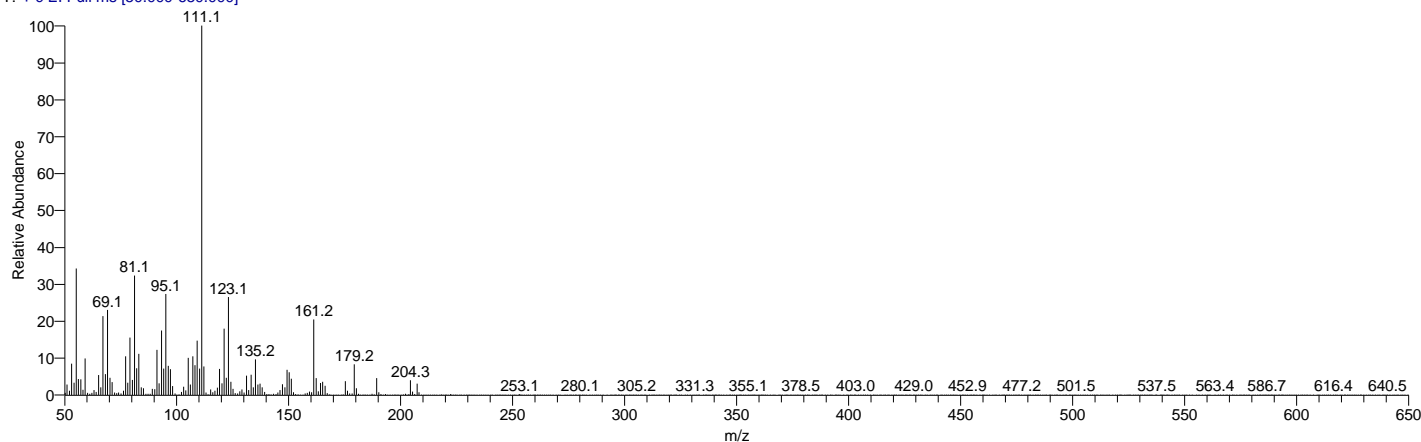

| RT    | Compound Name          | Area % | Molecular Formula                 | Molecular Weight | Cas #       | MF  | Library |
|-------|------------------------|--------|-----------------------------------|------------------|-------------|-----|---------|
| 21.11 | Caryophyllenyl alcohol | 0.14   | C <sub>15</sub> H <sub>26</sub> O | 222              | 913176-41-7 | 901 | mainlib |
| 21.11 | Caryophyllenyl alcohol | 0.14   | C <sub>15</sub> H <sub>26</sub> O | 222              | 913176-41-7 | 856 | replib  |

# My GC-MS Report

| RT                 | Compound Name                                                                               | Area % | Molecular Formula | Molecular Weight | Cas #     | MF  | Library |
|--------------------|---------------------------------------------------------------------------------------------|--------|-------------------|------------------|-----------|-----|---------|
| 21.11              | 4aH-Cycloprop[e]azulen-4a-ol, decahydro-1,1,4,7-tetramethyl-, [1aR-(1aà,4á,4á,7à,7aá,7bà)]- | 0.14   | C15H26O           | 222              | 5986-49-2 | 804 | replib  |
| Compound Structure |                                                                                             |        |                   | Hit Spectrum     |           |     |         |

Caryophyllenyl alcohol  
Formula C15H26O, MW 222, CAS# 913176-41-7, Entry# 88498  
4,8,11,11-Tetramethylbicyclo[7.2.0]undec-3-en-5-ol #

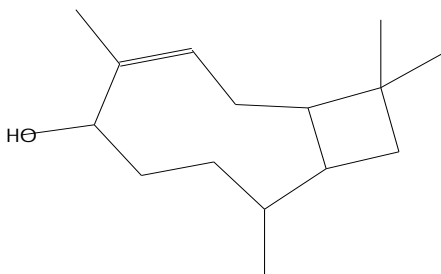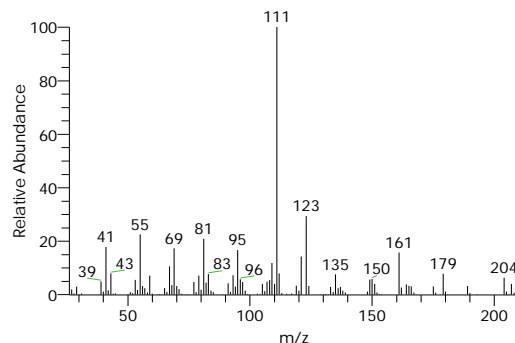

Caryophyllenyl alcohol  
Formula C15H26O, MW 222, CAS# 913176-41-7, Entry# 17579  
4,8,11,11-Tetramethylbicyclo[7.2.0]undec-3-en-5-ol #

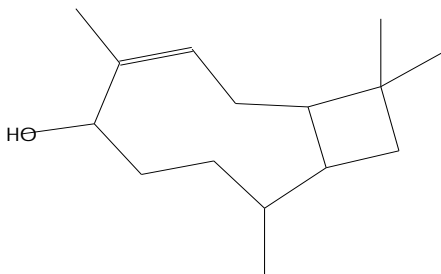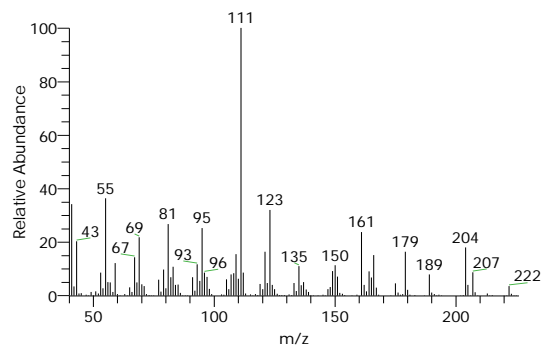

Formula C15H26O, MW 222, CAS# 5986-49-2, Entry# 17563  
(1aR,4S,4aS,7R,7aS,7bR)-1,1,4,7-Tetramethyldecahydro-1H-cyclopropa[e]azulen-4a-ol

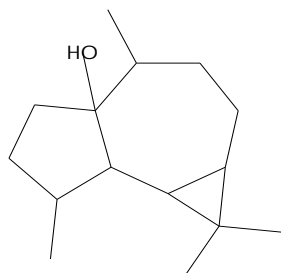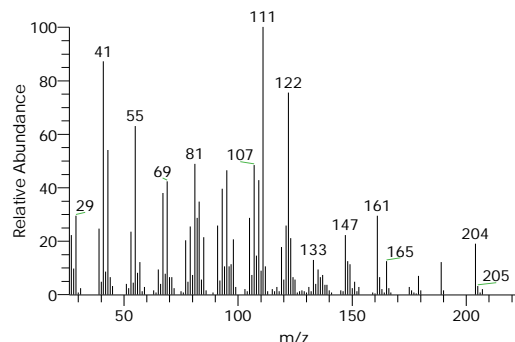

gerfa\_EA #5193 RT: 21.41 AV: 1 NL: 1.68E6  
T: + c EI Full ms [50.000-650.000]

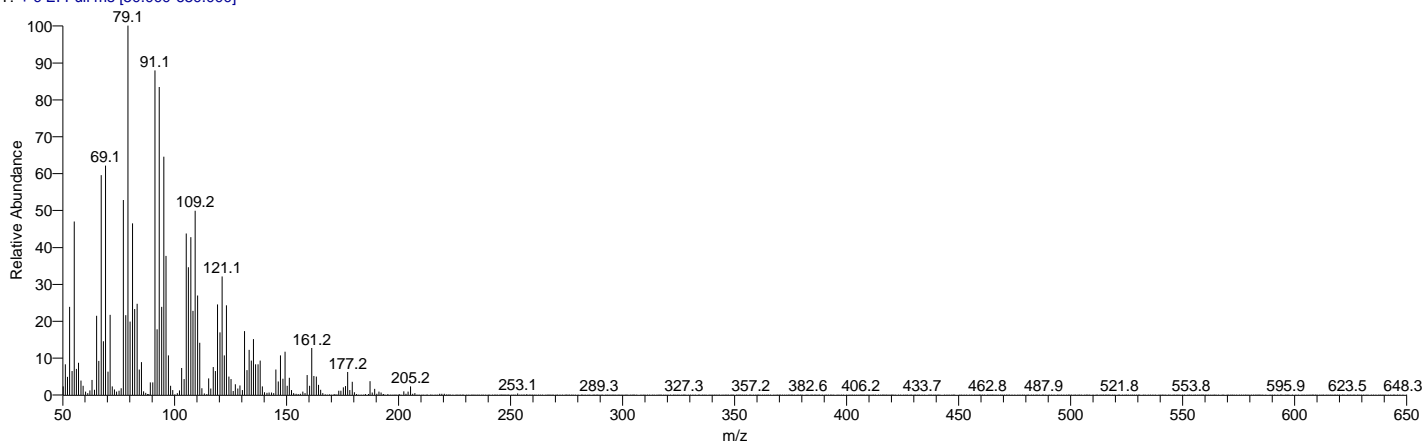

# My GC-MS Report

| RT    | Compound Name                                                                                | Area % | Molecular Formula | Molecular Weight | Cas #     | MF  | Library         |
|-------|----------------------------------------------------------------------------------------------|--------|-------------------|------------------|-----------|-----|-----------------|
| 21.41 | (-)-5-OXATRICYCLO[8.2.0.0(4,6)]DODECANE,,12-TRIMETHYL-9-METHYLENE-, [1R-(1R*,4R*,6R*,10S*)]- | 0.14   | C15H24O           | 220              | 1139-30-6 | 921 | WileyRegistry8e |
| 21.41 | (-)-5-OXATRICYCLO[8.2.0.0(4,6)]DODECANE,,12-TRIMETHYL-9-METHYLENE-, [1R-(1R*,4R*,6R*,10S*)]- | 0.14   | C15H24O           | 220              | 1139-30-6 | 925 | WileyRegistry8e |
| 21.41 | Caryophyllene oxide                                                                          | 0.14   | C15H24O           | 220              | 1139-30-6 | 913 | mainlib         |

Compound Structure

Hit Spectrum

Formula C15H24O, MW 220, CAS# 1139-30-6, Entry# 107245  
5-OXATRICYCLO[8.2.0.0(4,6)]DODECANE, 4,12,12-TRIMETHYL-9-METHYLENE-, (1R,4R,6R,10S)-

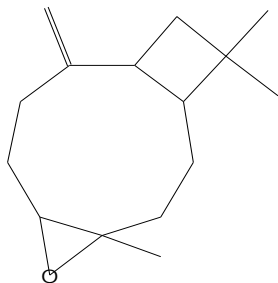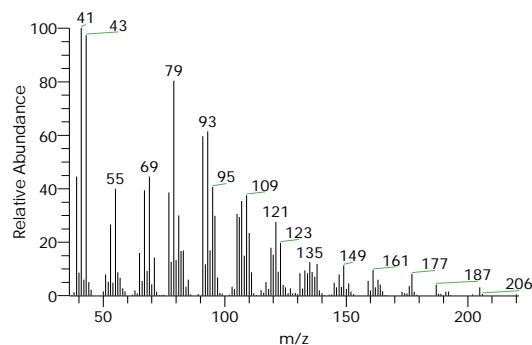

Formula C15H24O, MW 220, CAS# 1139-30-6, Entry# 107244  
5-OXATRICYCLO[8.2.0.0(4,6)]DODECANE, 4,12,12-TRIMETHYL-9-METHYLENE-, (1R,4R,6R,10S)-

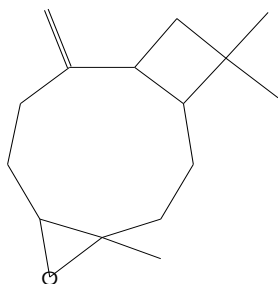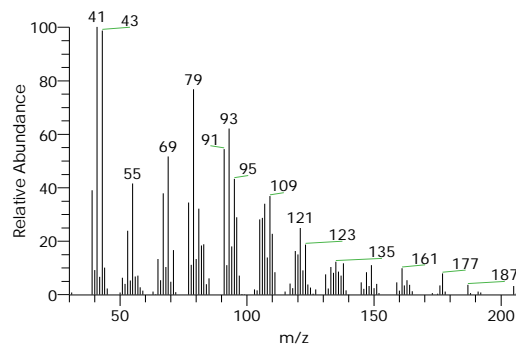

Caryophyllene oxide

Formula C15H24O, MW 220, CAS# 1139-30-6, Entry# 6247

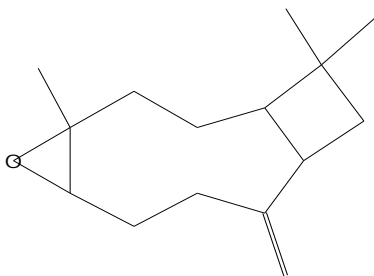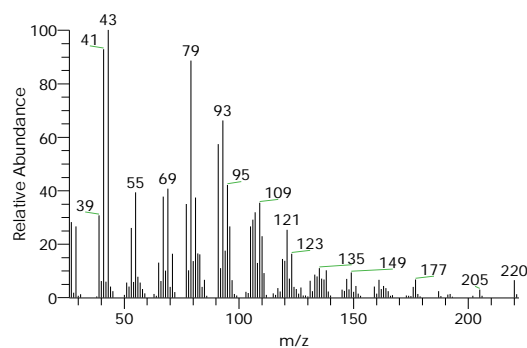

# My GC-MS Report

gerfa\_EA #5213 RT: 21.48 AV: 1 NL: 4.55E6  
T: + c EI Full ms [50.000-650.000]

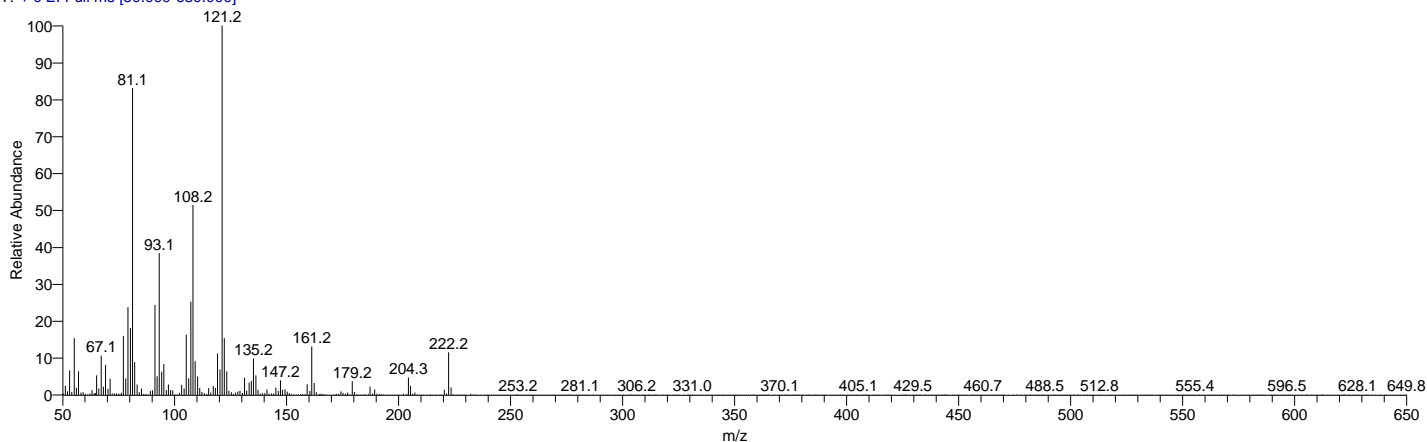

| RT    | Compound Name                                                   | Area % | Molecular Formula | Molecular Weight | Cas #   | MF  | Library |
|-------|-----------------------------------------------------------------|--------|-------------------|------------------|---------|-----|---------|
| 21.48 | (5S,6R,7S,10R)-7-Isopropyl-2,10-dimethylspiro[4.5]dec-1-en-6-ol | 0.16   | C15H26O           | 222              | 72203-9 | 905 | mainlib |
| 21.48 | gleenol                                                         | 0.16   | C15H26O           | 222              | NA      | 877 | mainlib |
| 21.48 | ç-Elemene                                                       | 0.16   | C15H24            | 204              | 29873-9 | 820 | mainlib |

## Compound Structure

## Hit Spectrum

(5S,6R,7S,10R)-7-Isopropyl-2,10-dimethylspiro[4.5]dec-1-en-6-ol  
Formula C15H26O, MW 222, CAS# 72203-99-7, Entry# 102652  
Spiro[4.5]dec-1-en-6-ol, 2,10-dimethyl-7-(1-methylethyl)-, (5S,6R,7S,10R)-

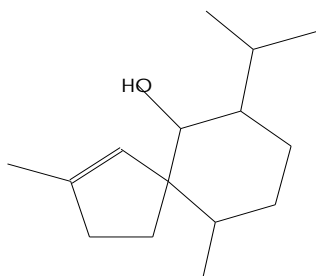

gleenol

Formula C15H26O, MW 222, CAS# NA, Entry# 102651  
\$:28MYLXGCVCCZCOHU-UHFFFAOYSA-N

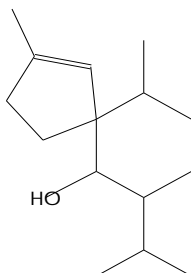

ç-Elemene

Formula C15H24, MW 204, CAS# 29873-99-2, Entry# 102784  
1-Methyl-2-(1-methylethenyl)-4-(1-methylethylidene)-1-vinylcyclohexane, (1R-trans)-

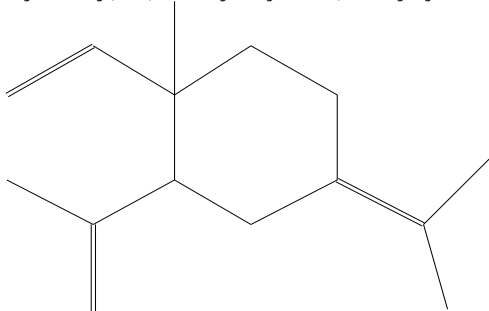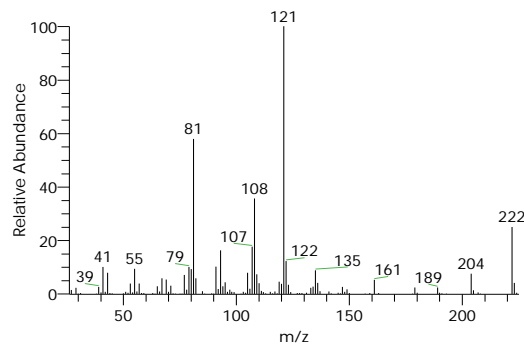

SI 864, RSI 877, mainlib, Entry# 102651, CAS# NA, gleenol

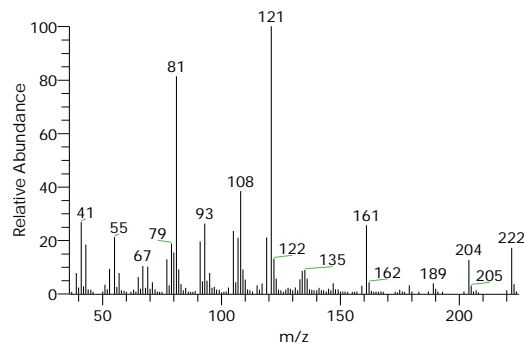

SI 775, RSI 820, mainlib, Entry# 102784, CAS# 29873-99-2, ç-Elemene

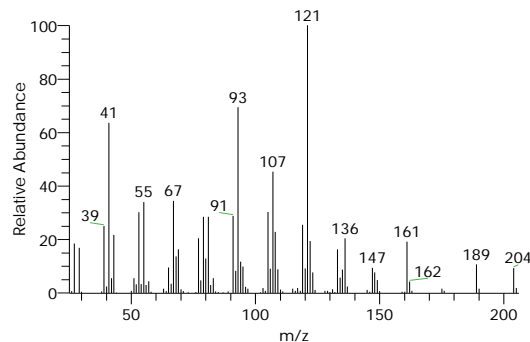

# My GC-MS Report

gerfa\_EA #5324 RT: 21.85 AV: 1 NL: 3.15E6  
T: + c EI Full ms [50.000-650.000]

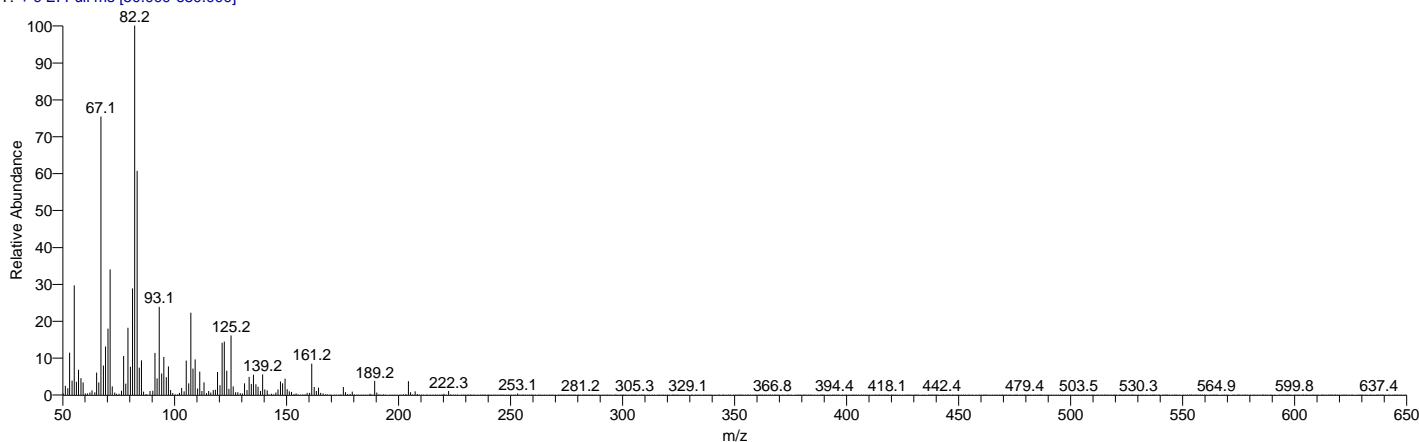

| RT    | Compound Name                                  | Area % | Molecular Formula | Molecular Weight | Cas #       | MF  | Library         |
|-------|------------------------------------------------|--------|-------------------|------------------|-------------|-----|-----------------|
| 21.85 | 3,7-Cycloundecadien-1-ol, 1,5,5,8-tetramethyl- | 0.11   | C15H26O           | 222              | 118014-38-3 | 889 | mainlib         |
| 21.85 | 1,5,5,8-TETRAMETHYL-3,7-CYCLOUNDECADIEN-1-OL # | 0.11   | C15H26O           | 222              | 118014-38-3 | 889 | WileyRegistry8e |
| 21.85 | 1,5,5,8-TETRAMETHYL-3,7-CYCLOUNDECADIEN-1-OL # | 0.11   | C15H26O           | 222              | 118014-38-3 | 889 | WileyRegistry8e |

Compound Structure

Hit Spectrum

3,7-Cycloundecadien-1-ol, 1,5,5,8-tetramethyl-  
Formula C15H26O, MW 222, CAS# 118014-38-3, Entry# 51254  
1,5,5,8-Tetramethyl-3,7-cycloundecadien-1-ol #

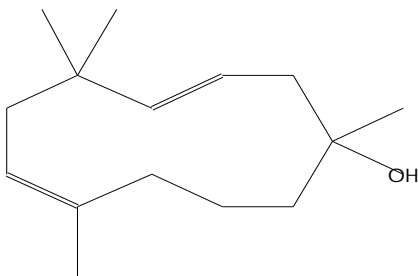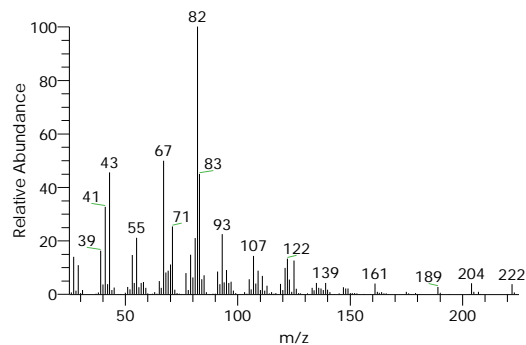

1,5,5,8-TETRAMETHYL-3,7-CYCLOUNDECADIEN-1-OL #  
Formula C15H26O, MW 222, CAS# 118014-38-3, Entry# 109756  
1,5,5,8-TETRAMETHYL-3,7-CYCLOUNDECADIEN-1-OL

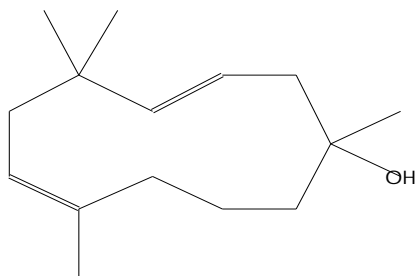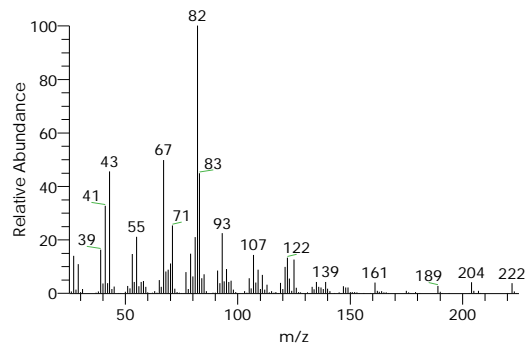

1,5,5,8-TETRAMETHYL-3,7-CYCLOUNDECADIEN-1-OL #  
Formula C15H26O, MW 222, CAS# 118014-38-3, Entry# 385407  
1,5,5,8-TETRAMETHYL-3,7-CYCLOUNDECADIEN-1-OL

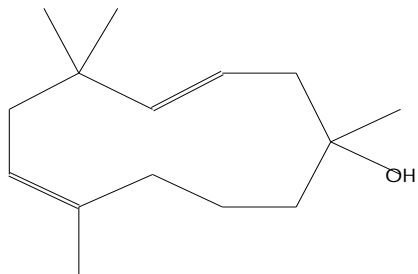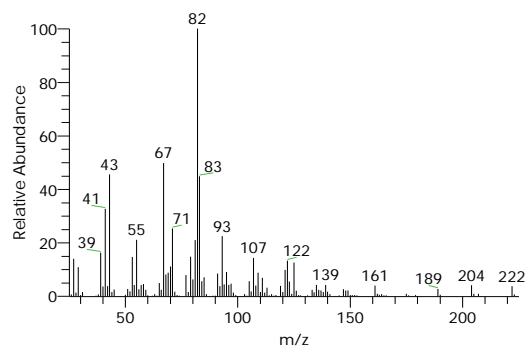



# My GC-MS Report

gerfa\_EA #5344 RT: 21.92 AV: 1 NL: 1.69E6  
T: + c EI Full ms [50.000-650.000]

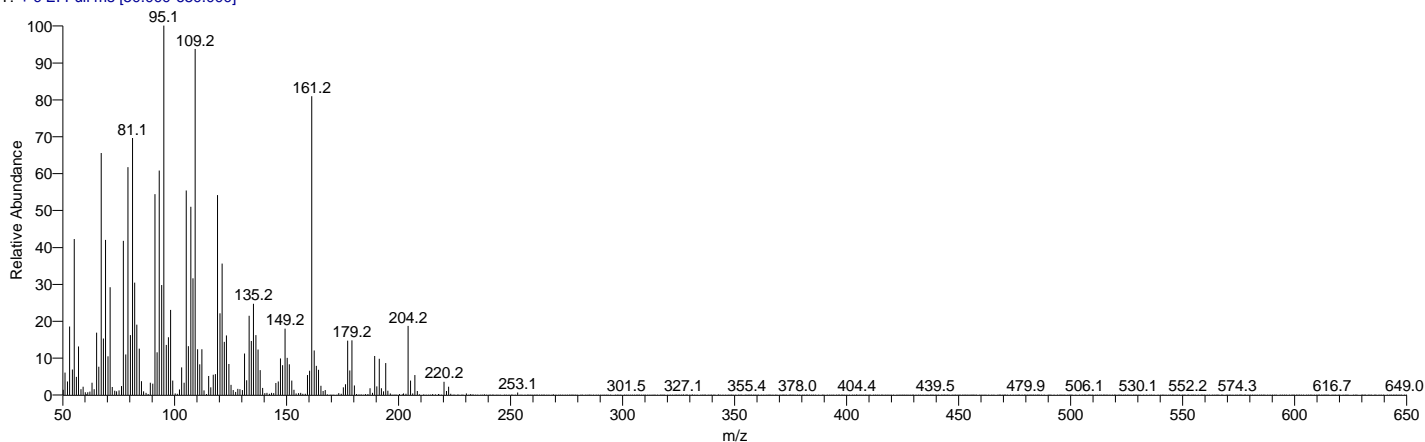

| RT    | Compound Name                                                                    | Area % | Molecular Formula | Molecular Weight | Cas #      | MF  | Library         |
|-------|----------------------------------------------------------------------------------|--------|-------------------|------------------|------------|-----|-----------------|
| 21.92 | (1S,3aS,4S,5S,7aR,8R)-5-Isopropyl-1,7a-dimethyloctahydro-1H-1,4-methaninden-8-ol | 0.14   | C15H26O           | 222              | 21966-93-8 | 896 | mainlib         |
| 21.92 | Globulol                                                                         | 0.14   | C15H26O           | 222              | 51371-47-2 | 844 | mainlib         |
| 21.92 | 1,1,4,7-TETRAMETHYLDECAHYDRO-1H-CYCLOPROPA[E]AZULEN-4-OL #                       | 0.14   | C15H26O           | 222              | 51371-47-2 | 844 | WileyRegistry8e |

Compound Structure

Hit Spectrum

(1S,3aS,4S,5S,7aR,8R)-5-Isopropyl-1,7a-dimethyloctahydro-1H-1,4-methaninden-8-ol  
Formula C15H26O, MW 222, CAS# 21966-93-8, Entry# 86038  
Copaborneol

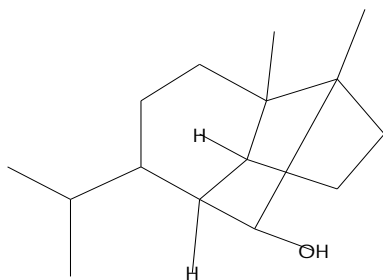

Globulol

Formula C15H26O, MW 222, CAS# 51371-47-2, Entry# 6178

1,1,4,7-Tetramethyldecahydro-1H-cyclopropa[e]azulen-4-ol, (1a,4a,4a,7a,7a,7b)-

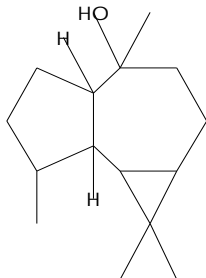

1,1,4,7-TETRAMETHYLDECAHYDRO-1H-CYCLOPROPA[E]AZULEN-4-OL #

Formula C15H26O, MW 222, CAS# 51371-47-2, Entry# 390796

1,1,4,7-TETRAMETHYLDECAHYDRO-1H-CYCLOPROPA[E]AZULEN-4-OL

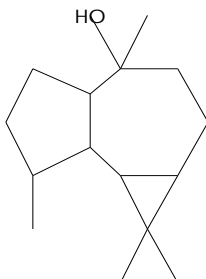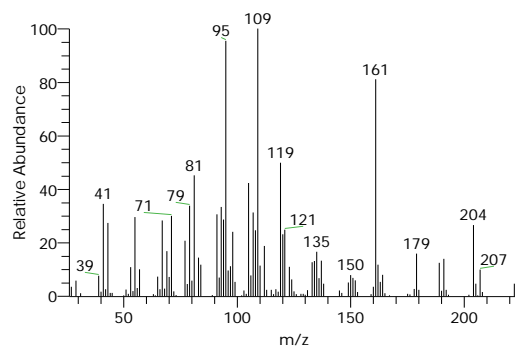

SI 816, RSI 844, mainlib, Entry# 6178, CAS# 51371-47-2, Globulol

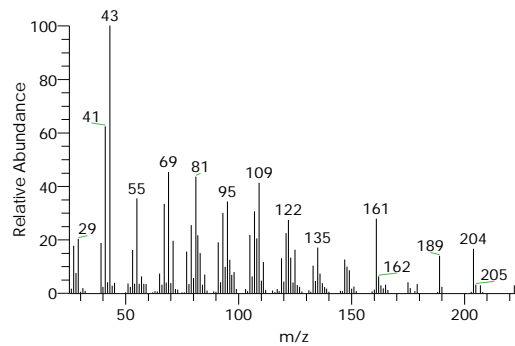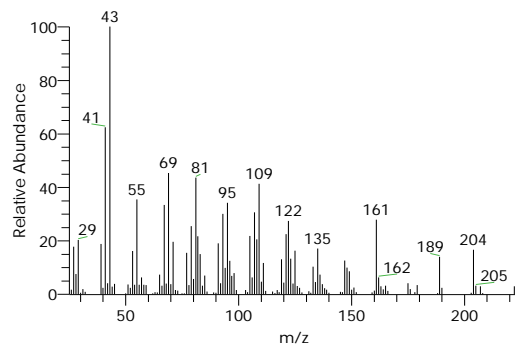

# My GC-MS Report

gerfa\_EA #5403 RT: 22.12 AV: 1 NL: 2.07E6  
T: + c EI Full ms [50.000-650.000]

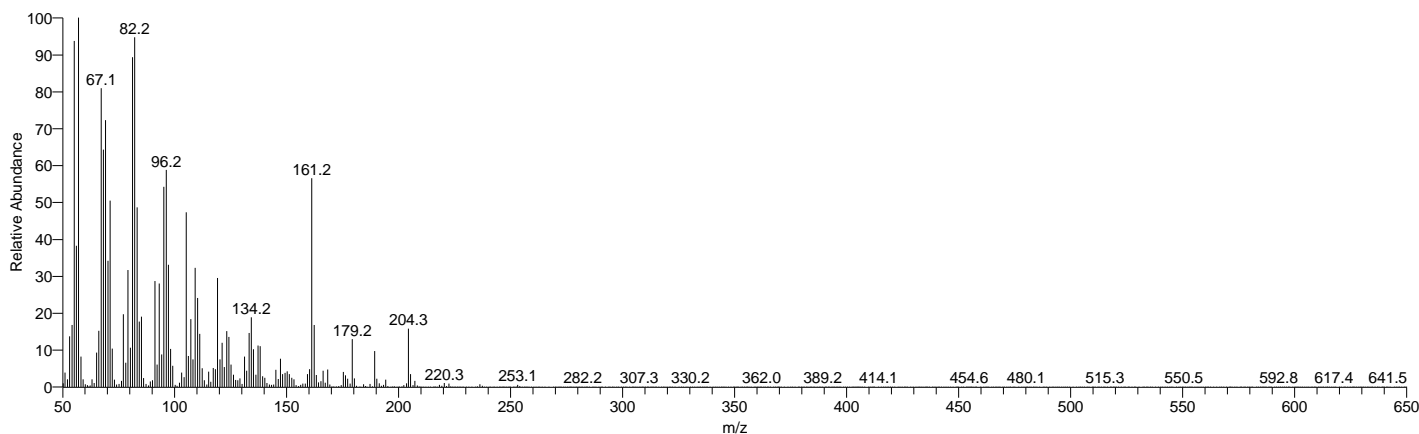

| RT    | Compound Name                                                                                | Area % | Molecular Formula | Molecular Weight | Cas #    | MF  | Library         |
|-------|----------------------------------------------------------------------------------------------|--------|-------------------|------------------|----------|-----|-----------------|
| 22.12 | 6-epi-shyobunol                                                                              | 0.22   | C15H26O           | 222              | NA       | 806 | mainlib         |
| 22.12 | Carotol                                                                                      | 0.22   | C15H26O           | 222              | 465-28-1 | 813 | replib          |
| 22.12 | 3A(1H)-AZULENOL, 2,3,4,5,8,8A-HEXAHYDRO-6,8A-DIMETHYL-3-(1-METHYLETHYL)-, [3R-(3à,3Aà,8Aà)]- | 0.22   | C15H26O           | 222              | 465-28-1 | 808 | WileyRegistry8e |

## Compound Structure

## Hit Spectrum

6-epi-shyobunol  
Formula C15H26O, MW 222, CAS# NA, Entry# 49759  
elema-1,3-dien-6à-ol

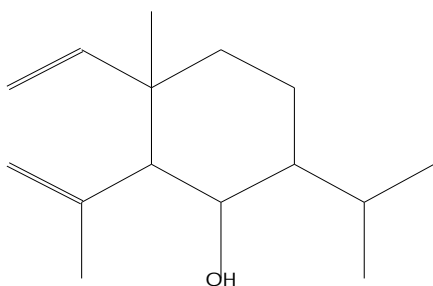

SI 794, RSI 806, mainlib, Entry# 49759, CAS# NA, 6-epi-shyobunol

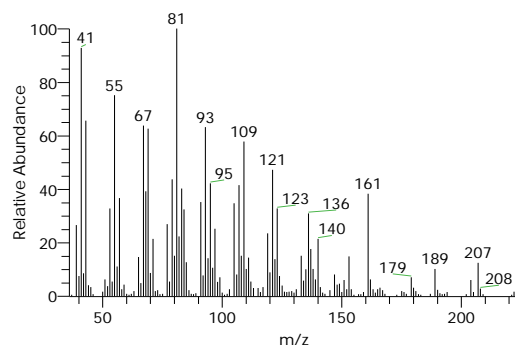

Carotol  
Formula C15H26O, MW 222, CAS# 465-28-1, Entry# 24838  
3a(1H)-Azulenol, 2,3,4,5,8,8a-hexahydro-6,8a-dimethyl-3-(1-methylethyl)-, [3R-(3à,3Aà,8Aà)]-

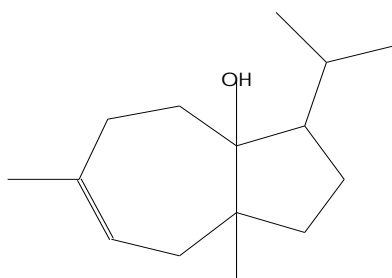

SI 774, RSI 813, replib, Entry# 24838, CAS# 465-28-1, Carotol

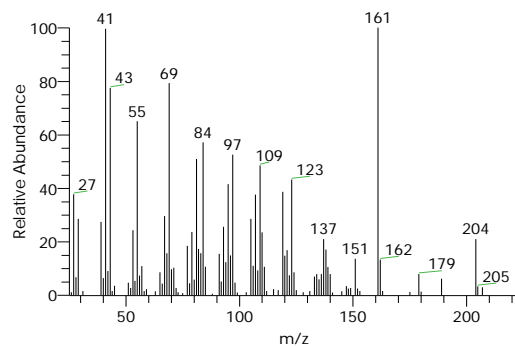

Formula C15H26O, MW 222, CAS# 465-28-1, Entry# 109801  
3-ISOPROPYL-6,8A-DIMETHYL-2,3,4,5,8,8A-HEXAHYDRO-3A(1H)-AZULENOL #

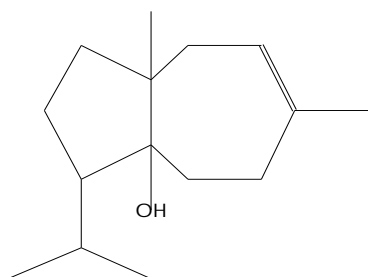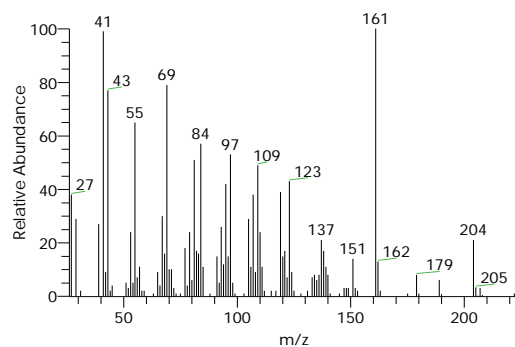

# My GC-MS Report

gerfa\_EA #5510 RT: 22.48 AV: 1 NL: 9.95E6  
T: + c EI Full ms [50.000-650.000]

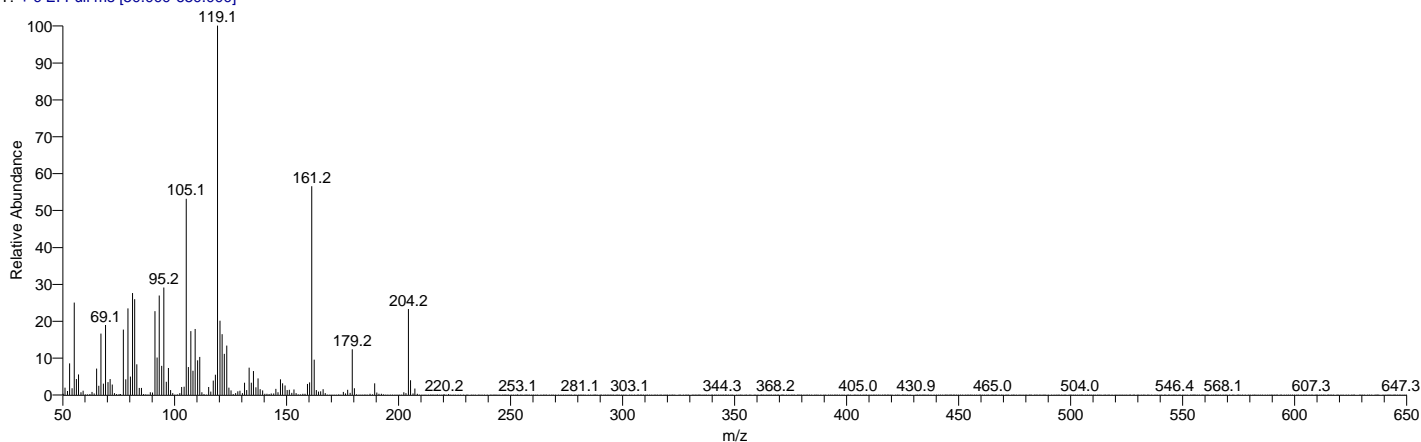

| RT    | Compound Name       | Area % | Molecular Formula | Molecular Weight | Cas #   | MF  | Library |
|-------|---------------------|--------|-------------------|------------------|---------|-----|---------|
| 22.48 | Di-epi-1,10-cubenol | 0.53   | C15H26O           | 222              | 73365-7 | 939 | mainlib |
| 22.48 | Epicubenol          | 0.53   | C15H26O           | 222              | 19912-6 | 919 | mainlib |
| 22.48 | Cubenol             | 0.53   | C15H26O           | 222              | 21284-2 | 914 | mainlib |

## Compound Structure

## Hit Spectrum

### Di-epi-1,10-cubenol

Formula C15H26O, MW 222, CAS# 73365-77-2, Entry# 100531  
(1S,4S,4aS,8aR)-1-Isopropyl-4,7-dimethyl-1,3,4,5,6,8a-hexahydronaphthalen-4a(2H)-ol

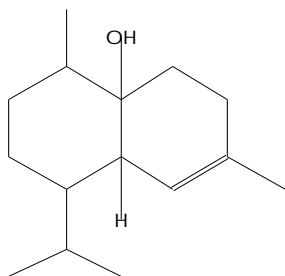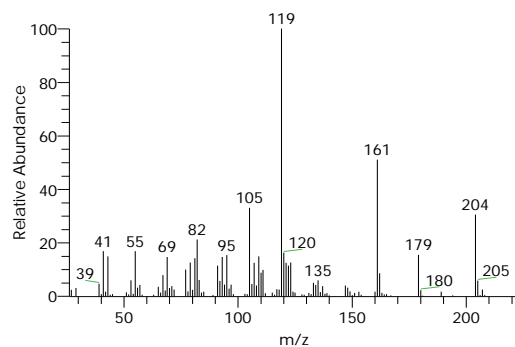

### Epicubenol

Formula C15H26O, MW 222, CAS# 19912-67-5, Entry# 100535  
(1S,4R,4aS,8aR)-1-Isopropyl-4,7-dimethyl-1,2,3,4,4a,5,6,8a-octahydronaphthalen-4a-ol

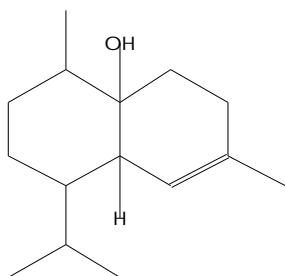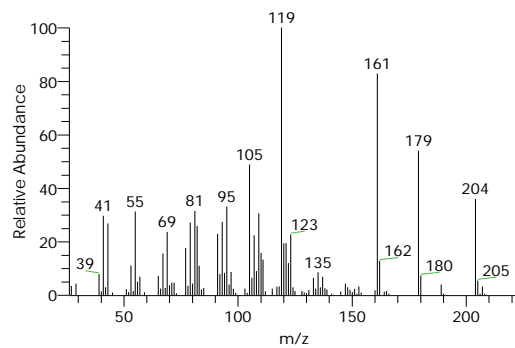

### Cubenol

Formula C15H26O, MW 222, CAS# 21284-22-0, Entry# 98767  
1-Isopropyl-4,7-dimethyl-1,3,4,5,6,8a-hexahydro-4a(2H)-naphthalenol-, [1S-(1à,4á,4aâ,8aâ)]-

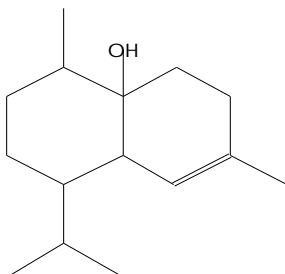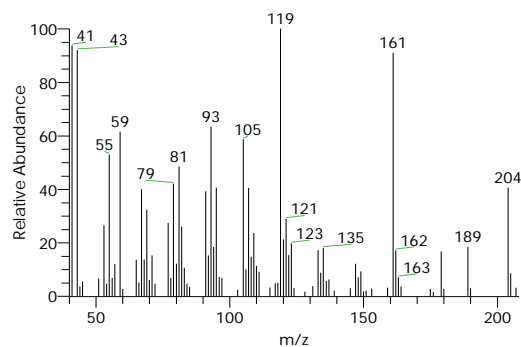

# My GC-MS Report

gerfa\_EA #5606 RT: 22.80 AV: 1 NL: 1.35E7  
T: + c EI Full ms [50.000-650.000]

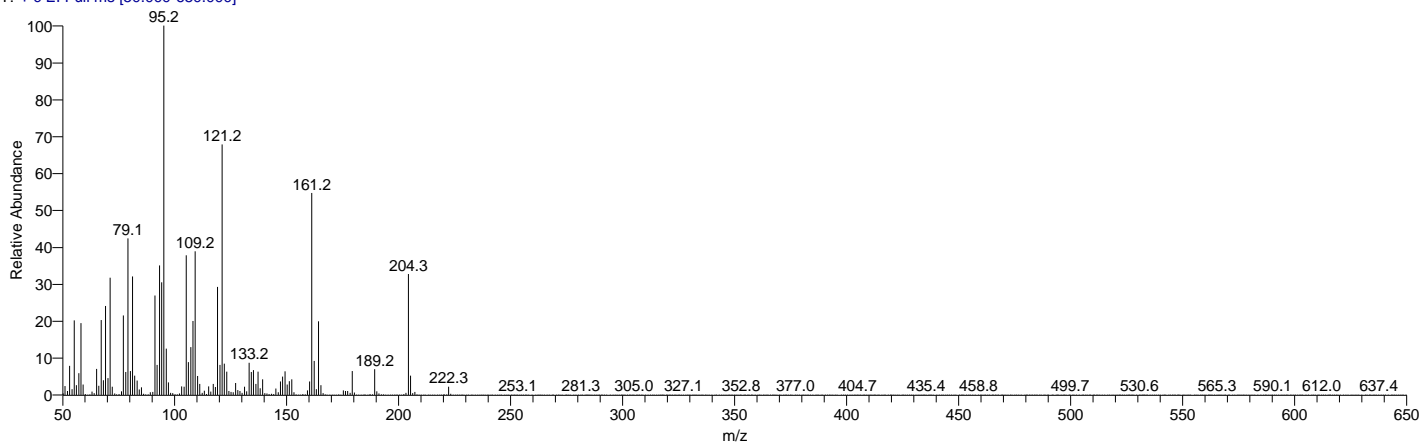

| RT    | Compound Name  | Area % | Molecular Formula | Molecular Weight | Cas #      | MF  | Library |
|-------|----------------|--------|-------------------|------------------|------------|-----|---------|
| 22.80 | .tau.-Muurolol | 0.77   | C15H26O           | 222              | 19912-62-0 | 949 | replib  |
| 22.80 | à-Cadinol      | 0.77   | C15H26O           | 222              | 481-34-5   | 934 | replib  |
| 22.80 | .tau.-Muurolol | 0.77   | C15H26O           | 222              | 19912-62-0 | 923 | mainlib |

## Compound Structure

## Hit Spectrum

.tau.-Muurolol

Formula C15H26O, MW 222, CAS# 19912-62-0, Entry# 3342

4-Isopropyl-1,6-dimethyl-1,2,3,4,4a,7,8,8a-octahydro-1-naphthalenol-, [1S-(1à,4à,4aà,8aà)]-

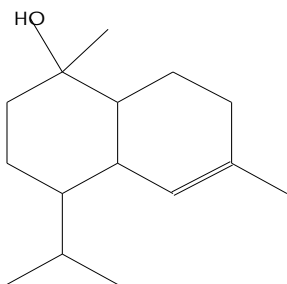

SI 932, RSI 949, replib, Entry# 3342, CAS# 19912-62-0, .tau.-Muurolol

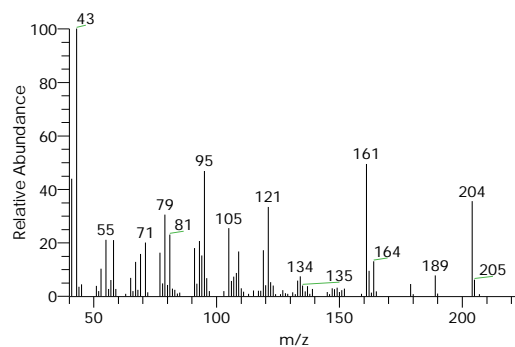

à-Cadinol

Formula C15H26O, MW 222, CAS# 481-34-5, Entry# 3029

4-Isopropyl-1,6-dimethyl-1,2,3,4,4a,7,8,8a-octahydro-1-naphthalenol #

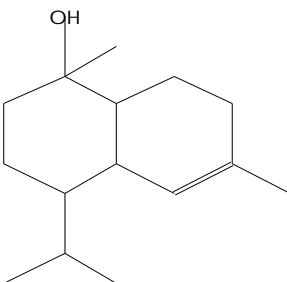

SI 924, RSI 934, replib, Entry# 3029, CAS# 481-34-5, à-Cadinol

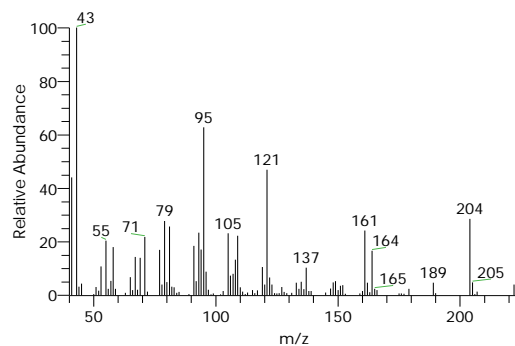

.tau.-Muurolol

Formula C15H26O, MW 222, CAS# 19912-62-0, Entry# 68534

4-Isopropyl-1,6-dimethyl-1,2,3,4,4a,7,8,8a-octahydro-1-naphthalenol-, [1S-(1à,4à,4aà,8aà)]-

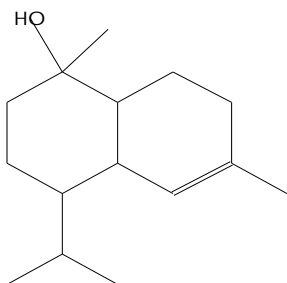

SI 923, RSI 923, mainlib, Entry# 68534, CAS# 19912-62-0, .tau.-Muurolol

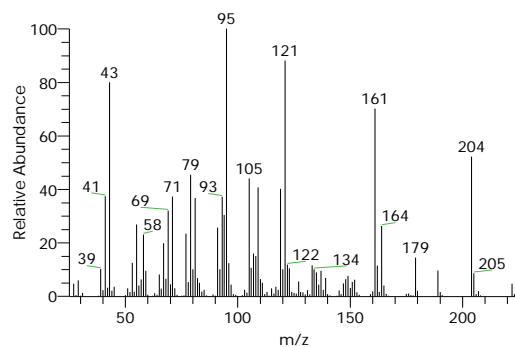

# My GC-MS Report

gerfa\_EA #5635 RT: 22.89 AV: 1 NL: 9.19E6  
T: + c EI Full ms [50.000-650.000]

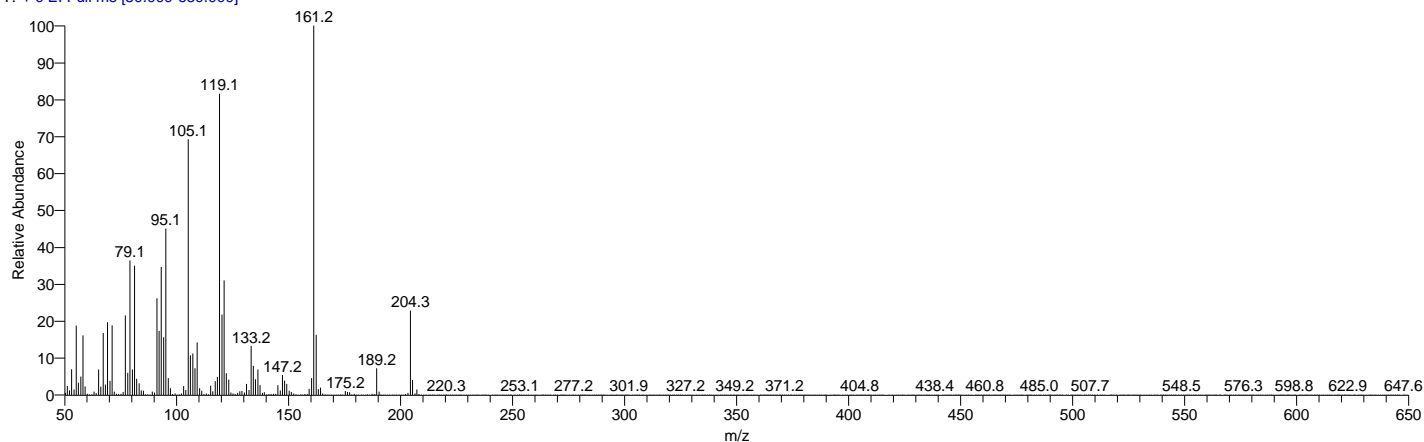

| RT    | Compound Name                                                                                                | Area % | Molecular Formula | Molecular Weight | Cas #          | MF  | Library             |
|-------|--------------------------------------------------------------------------------------------------------------|--------|-------------------|------------------|----------------|-----|---------------------|
| 22.89 | 1-Naphthalenol,<br>1,2,3,4,4a,7,8,8a-octahydro-1,6-dimethyl-4-(1-m<br>ethylethyl)-, [1R-(1à,4á,4aá,8aá)]-    | 0.37   | C15H26O           | 222              | 19435-9<br>7-3 | 947 | mainlib             |
| 22.89 | 1-NAPHTHALENOL,<br>1,2,3,4,4A,7,8,8A-OCTAHYDRO-1,6-DIMET<br>HYL-4-(1-METHYLETHYL)-,<br>[1R-(1à,4á,4Aá,8Aá)]- | 0.37   | C15H26O           | 222              | 19435-9<br>7-3 | 947 | WileyRegi<br>stry8e |
| 22.89 | 1-Naphthalenol,<br>1,2,3,4,4a,7,8,8a-octahydro-1,6-dimethyl-4-(1-m<br>ethylethyl)-, [1R-(1à,4á,4aá,8aá)]-    | 0.37   | C15H26O           | 222              | 19435-9<br>7-3 | 934 | replib              |

Compound Structure

Hit Spectrum

Formula C15H26O, MW 222, CAS# 19435-97-3, Entry# 150252  
(1R,4S,4aR,8aS)-4-Isopropyl-1,6-dimethyl-1,2,3,4,4a,7,8,8a-octahydronaphthalen-1-ol

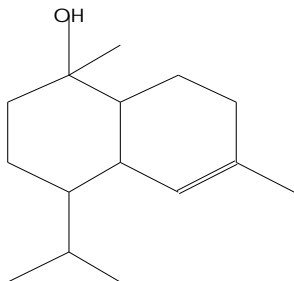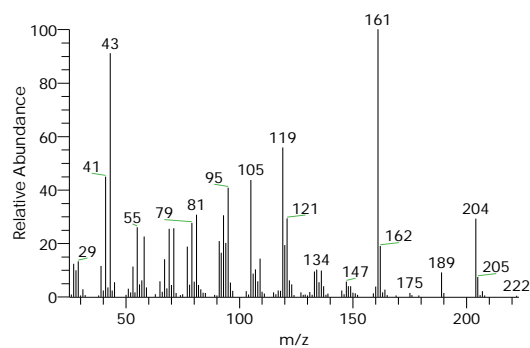

Formula C15H26O, MW 222, CAS# 19435-97-3, Entry# 109844  
4-ISOPROPYL-1,6-DIMETHYL-1,2,3,4,4A,7,8,8A-OCTAHYDRO-1-NAPHTHALENOL #

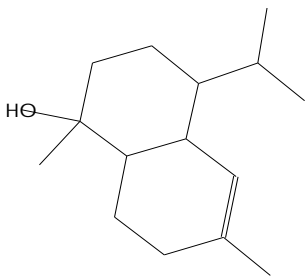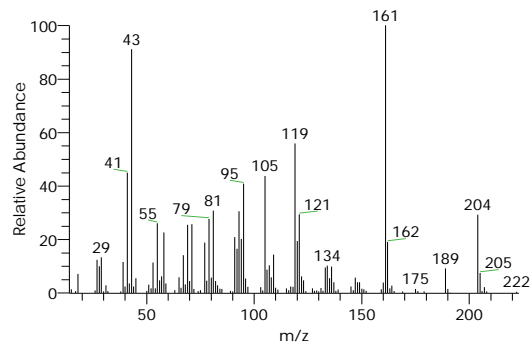

# My GC-MS Report

Compound Structure

Hit Spectrum

Formula C<sub>15</sub>H<sub>26</sub>O, MW 222, CAS# 19435-97-3, Entry# 24849  
(1R,4S,4aR,8aS)-4-Isopropyl-1,6-dimethyl-1,2,3,4,4a,7,8,8a-octahydronaphthalen-1-ol

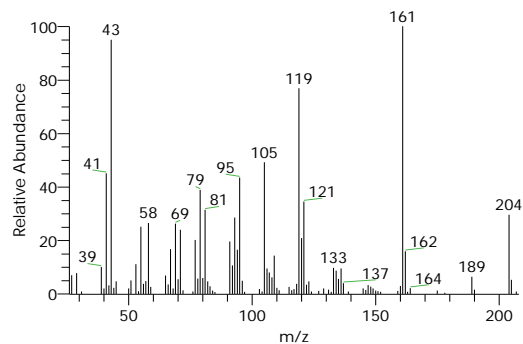

gerfa\_EA #7757 RT: 30.01 AV: 1 NL: 7.40E6  
T: + c EI Full ms [50.000-650.000]

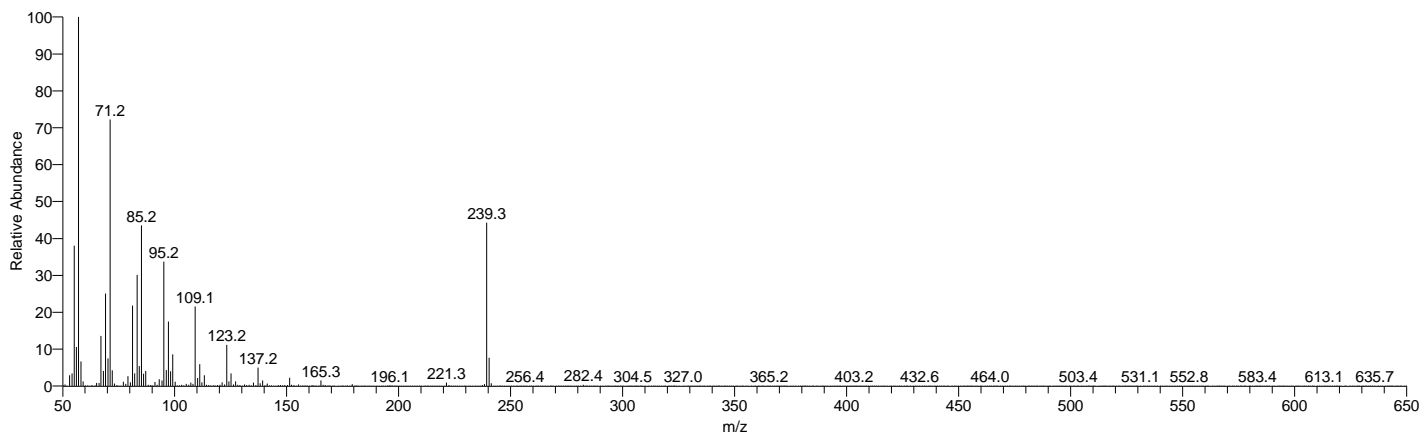

| RT    | Compound Name                          | Area % | Molecular Formula                               | Molecular Weight | Cas #     | MF  | Library |
|-------|----------------------------------------|--------|-------------------------------------------------|------------------|-----------|-----|---------|
| 30.01 | Palmitic acid vinyl ester              | 0.25   | C <sub>18</sub> H <sub>34</sub> O <sub>2</sub>  | 282              | 693-38-9  | 919 | replib  |
| 30.01 | Palmitic acid vinyl ester              | 0.25   | C <sub>18</sub> H <sub>34</sub> O <sub>2</sub>  | 282              | 693-38-9  | 862 | mainlib |
| 30.01 | Hexadecanoic acid, 4-nitrophenyl ester | 0.25   | C <sub>22</sub> H <sub>35</sub> NO <sub>4</sub> | 377              | 1492-30-4 | 823 | mainlib |

Compound Structure

Hit Spectrum

Palmitic acid vinyl ester  
Formula C<sub>18</sub>H<sub>34</sub>O<sub>2</sub>, MW 282, CAS# 693-38-9, Entry# 6202  
Hexadecanoic acid, ethenyl ester

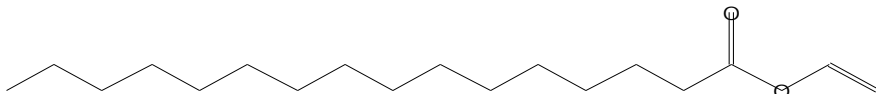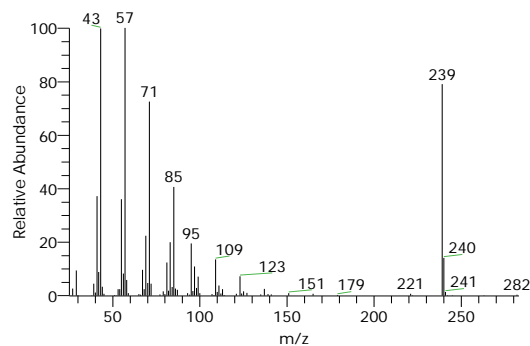

# My GC-MS Report

Compound Structure

Hit Spectrum

Palmitic acid vinyl ester  
Formula C18H34O2, MW 282, CAS# 693-38-9, Entry# 24552  
Hexadecanoic acid, ethenyl ester

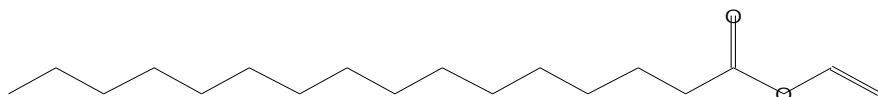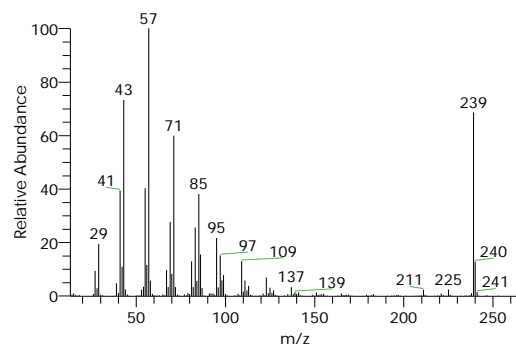

Hexadecanoic acid, 4-nitrophenyl ester  
Formula C22H35NO4, MW 377, CAS# 1492-30-4, Entry# 7638  
4-Nitrophenyl palmitate #

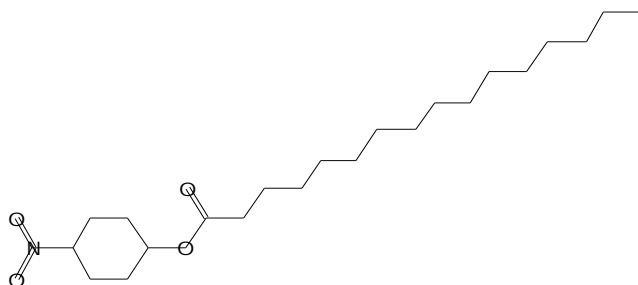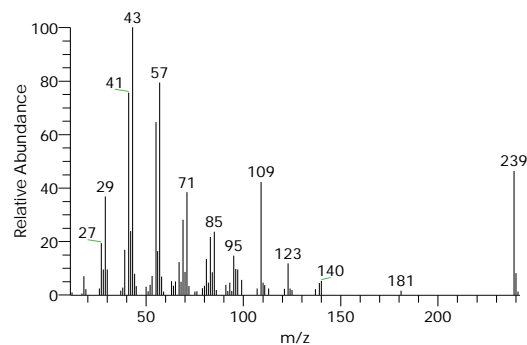

gerfa\_EA #8726 RT: 33.26 AV: 1 NL: 2.03E6  
T: + c EI Full ms [50.000-650.000]

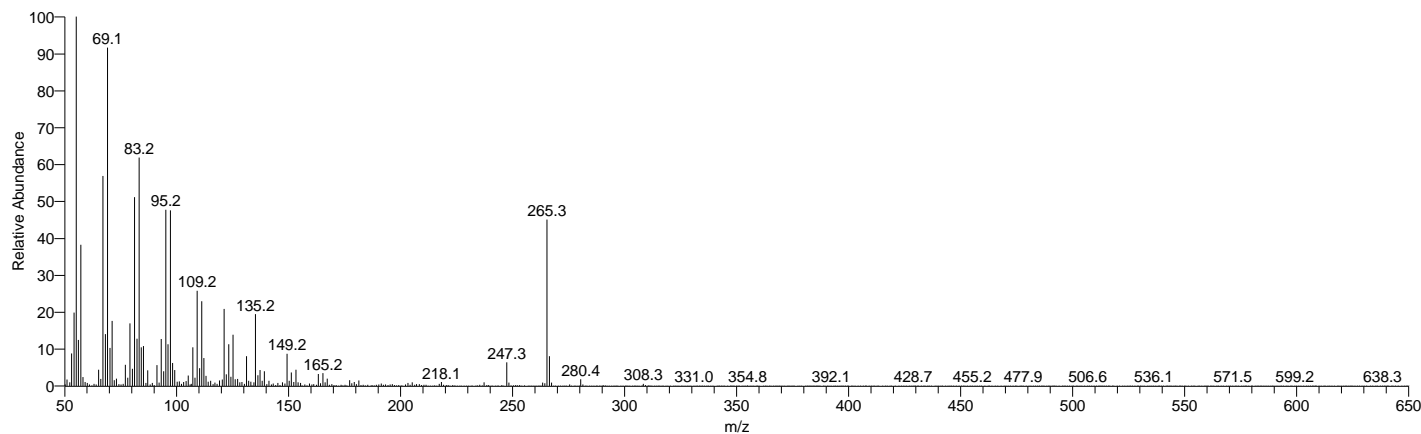

| RT    | Compound Name                         | Area % | Molecular Formula | Molecular Weight | Cas #   | MF  | Library   |
|-------|---------------------------------------|--------|-------------------|------------------|---------|-----|-----------|
| 33.26 | E,E,Z-1,3,12-Nonadecatriene-5,14-diol | 0.12   | C19H34O2          | 294              | NA      | 720 | mainlib   |
| 33.26 | 2,5-FURANDIONE,                       | 0.12   | C16H26O3          | 266              | 25377-7 | 797 | WileyRegi |
|       | 3-(DODECENYL)DIHYDRO-                 |        |                   |                  | 3-5     |     | stry8e    |
| 33.26 | 2-Dodecen-1-yl(-)succinic anhydride   | 0.12   | C16H26O3          | 266              | 19780-1 | 794 | mainlib   |
|       |                                       |        |                   |                  | 1-1     |     |           |

# My GC-MS Report

Compound Structure

Hit Spectrum

E,E,Z-1,3,12-Nonadecatriene-5,14-diol  
Formula C<sub>19</sub>H<sub>34</sub>O<sub>2</sub>, MW 294, CAS# NA, Entry# 21026  
(3E,12Z)-1,3,12-Nonadecatriene-5,14-diol #

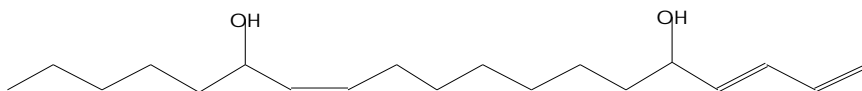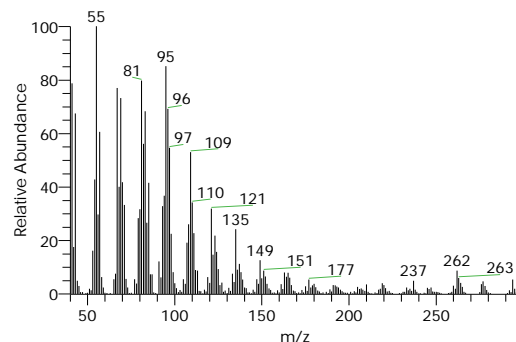

2,5-FURANDIONE, 3-(DODECENYL)DIHYDRO-  
Formula C<sub>16</sub>H<sub>26</sub>O<sub>3</sub>, MW 266, CAS# 25377-73-5, Entry# 156913  
2,5-FURANDIONE, 3-DODECYL-

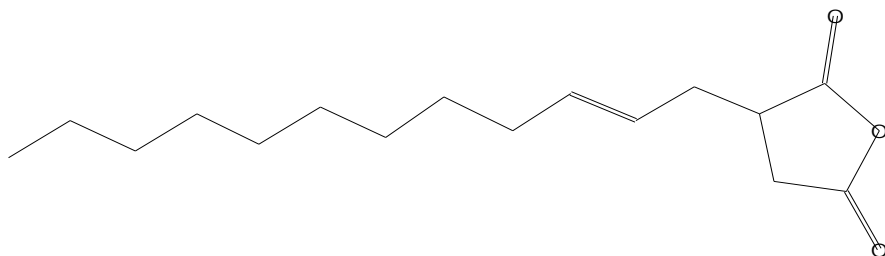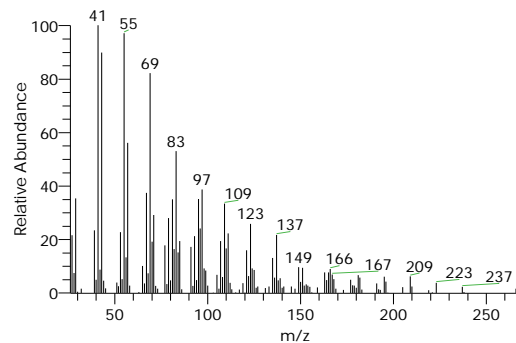

2-Dodecen-1-yl(-)succinic anhydride  
Formula C<sub>16</sub>H<sub>26</sub>O<sub>3</sub>, MW 266, CAS# 19780-11-1, Entry# 2686  
2,5-Furandione, 3-dodecenyl-

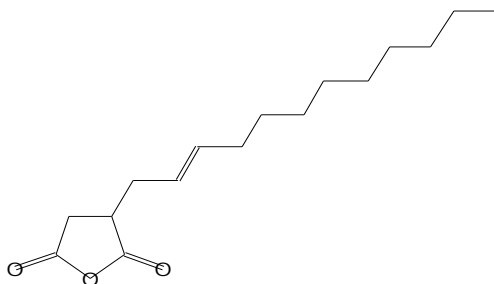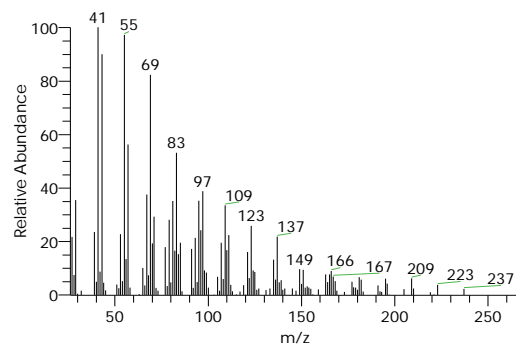

gerfa\_EA #9386 RT: 35.47 AV: 1 NL: 1.07E7  
T: + c EI Full ms [50.000-650.000]

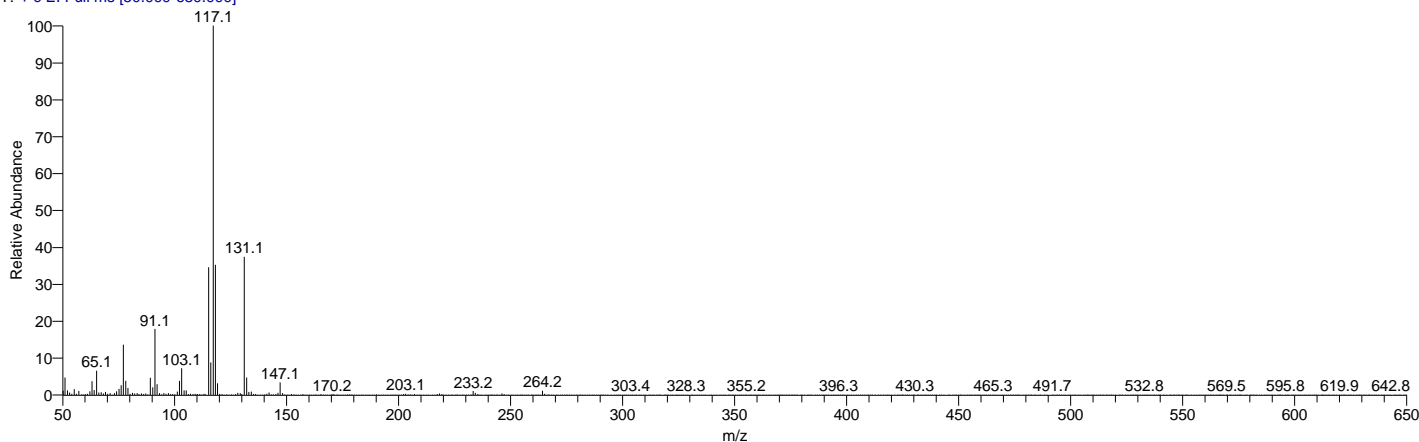

| RT    | Compound Name                | Area % | Molecular Formula               | Molecular Weight | Cas #         | MF  | Library             |
|-------|------------------------------|--------|---------------------------------|------------------|---------------|-----|---------------------|
| 35.47 | (1-METHYLCYCLOPROPYL)BENZENE | 0.21   | C <sub>10</sub> H <sub>12</sub> | 132              | NA            | 814 | WileyRegi<br>stry8e |
| 35.47 | DELTACYCLENE                 | 0.21   | C <sub>9</sub> H <sub>10</sub>  | 118              | 7785-1<br>0-6 | 897 | WileyRegi<br>stry8e |



# My GC-MS Report

| RT                 | Compound Name | Area % | Molecular Formula              | Molecular Weight | Cas #     | MF  | Library |
|--------------------|---------------|--------|--------------------------------|------------------|-----------|-----|---------|
| 35.47              | Deltacyclene  | 0.21   | C <sub>9</sub> H <sub>10</sub> | 118              | 7785-10-6 | 896 | mainlib |
| Compound Structure |               |        |                                | Hit Spectrum     |           |     |         |

(1-METHYLCYCLOPROPYL)BENZENE  
Formula C<sub>10</sub>H<sub>12</sub>, MW 132, CAS# NA, Entry# 380177  
CYCLOPROPAN, 1-METHYL-1-PHENYL-

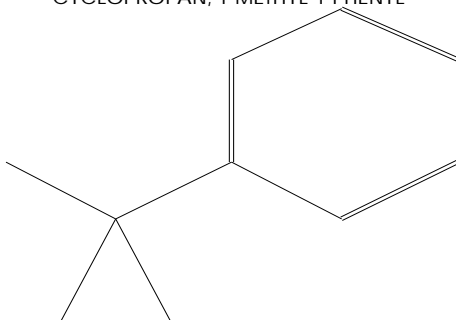

DELTACYCLENE

Formula C<sub>9</sub>H<sub>10</sub>, MW 118, CAS# 7785-10-6, Entry# 358032  
TETRACYCLO[4,3,0,0(4,9),0(5,7)]NON-2-ENE

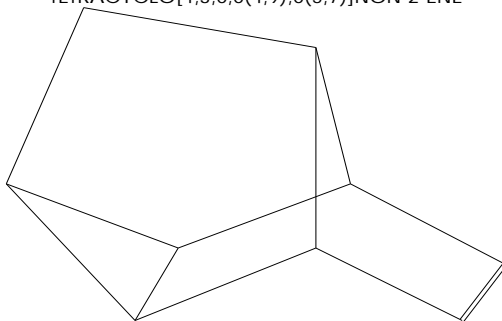

Deltacyclene

Formula C<sub>9</sub>H<sub>10</sub>, MW 118, CAS# 7785-10-6, Entry# 97452  
Tetracyclo[4,3,0,0(4,9),0(5,7)]non-2-ene

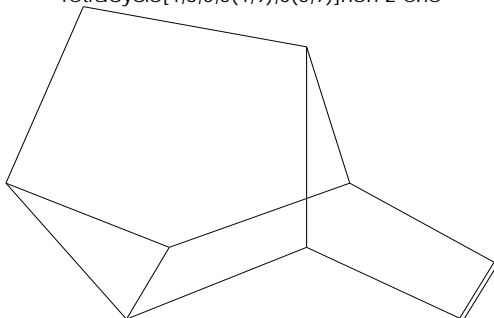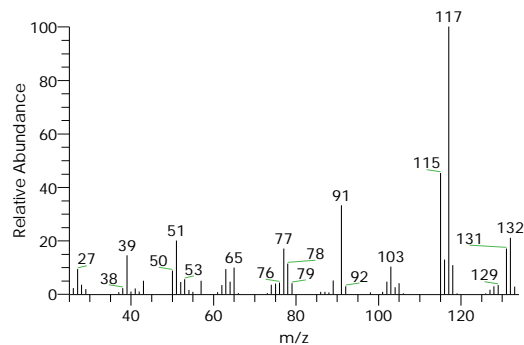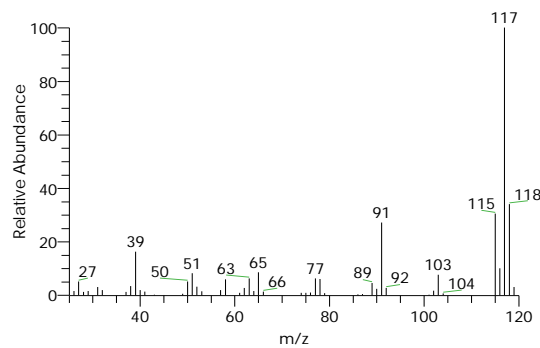

SI 769, RSI 896, mainlib, Entry# 97452, CAS# 7785-10-6, Deltacyclene

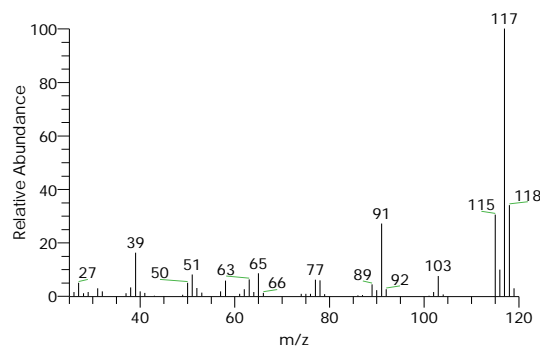

Supplement: s1 [file s1]
