# Supplementary material for: Phytochemical Characterization and Chemotherapeutic Potential of Cinnamomum verum Extracts on the Multiplication of Protozoan Parasites In Vitro and In Vivo
Source: MDPI journal article supplement (doi:10.3390/molecules25040996), 2020-02-24
Supplement: s1 [file s1]

**Table S1.** The IC<sub>50</sub> and selectivity index of diminazene aceturate (DA), methanolic *S. aromaticum* (MESA) and methanolic *O. europaea* (MEOE).

| Drug              | Parasite            | IC <sub>50</sub> ( µg/mL ) <sup>a</sup><br>parasites | EC <sub>50</sub> (µg/mL) <sup>b</sup> |         |       | Selective indices <sup>c</sup> |         |         |
|-------------------|---------------------|------------------------------------------------------|---------------------------------------|---------|-------|--------------------------------|---------|---------|
|                   |                     |                                                      | MDBK                                  | NIH/3T3 | HFF   | MDBK                           | NIH/3T3 | HFF     |
| DA                | <i>B. bovis</i>     | 0.25 ± 0.02                                          | > 100                                 | > 100   | > 100 | > 400                          | > 400   | > 400   |
|                   | <i>B. bigemina</i>  | 0.11 ± 0.01                                          | > 100                                 | > 100   | > 100 | > 909                          | > 909   | > 909   |
|                   | <i>B. divergens</i> | 0.35 ± 0.03                                          | > 100                                 | > 100   | > 100 | > 285.7                        | > 285.7 | > 285.7 |
|                   | <i>B. caballi</i>   | 0.003 ± 0.001                                        | > 100                                 | > 100   | > 100 | > 33333                        | > 33333 | > 33333 |
|                   | <i>T. equi</i>      | 0.37 ± 0.01                                          | > 100                                 | > 100   | > 100 | > 270.3                        | > 270.3 | > 270.3 |
| MESA <sup>d</sup> | <i>B. bovis</i>     | 109.8 ± 3.8                                          | 894.7± 4.9                            | >1000   | >1000 | 8.1                            | > 9.1   | > 9.1   |
|                   | <i>B. bigemina</i>  | 8.7 ± 0.09                                           | 894.7± 4.9                            | >1000   | >1000 | 102.8                          | > 114.9 | >114.9  |
|                   | <i>B. divergens</i> | 76.4 ± 4.5                                           | 894.7± 4.9                            | >1000   | >1000 | 11.7                           | > 13.1  | > 13.1  |
|                   | <i>B. caballi</i>   | 19.6 ± 2.2                                           | 894.7± 4.9                            | >1000   | >1000 | 45.6                           | > 51.1  | > 51.1  |
|                   | <i>T. equi</i>      | 60.0 ± 7.3                                           | 894.7± 4.9                            | >1000   | >1000 | 14.9                           | > 16.7  | > 16.7  |
| MEOE <sup>e</sup> | <i>B. bovis</i>     | 107.1 ± 9.2                                          | 794.7± 41.9                           | >1500   | >1500 | 7.4                            | > 14    | > 14    |
|                   | <i>B. bigemina</i>  | 47.7 ± 2.3                                           | 794.7± 41.9                           | >1500   | >1500 | 16.7                           | > 31.4  | > 31.4  |
|                   | <i>B. divergens</i> | 101.1 ± 8.9                                          | 794.7± 41.9                           | >1500   | >1500 | 7.9                            | > 14.8  | > 14.8  |
|                   | <i>B. caballi</i>   | 105.5 ± 11.1                                         | 794.7± 41.9                           | >1500   | >1500 | 7.5                            | > 14.2  | > 14.2  |
|                   | <i>T. equi</i>      | 19.3 ± 2.1                                           | 794.7± 41.9                           | >1500   | >1500 | 41.2                           | > 77.7  | > 77.7  |

<sup>a</sup> Half-maximal inhibitory concentration of extracts on piroplasm parasites *in vitro*. <sup>b</sup> Half-maximal effective concentration of extracts on cell lines. The values were determined from the dose-response curve using non-linear regression (curve fit analysis). The values are the means of triplicate experiments. <sup>c</sup> Ratio of the cell lines EC<sub>50</sub> to the parasite IC<sub>50</sub>. High numbers are favorable. <sup>d</sup>[7], <sup>e</sup>[9].
